# Supplementary material for: Pd( ii )-catalyzed B(9)-alkynylation of o / m -carboranes
Source: Royal Society of Chemistry journal article supplement (doi:10.1039/d4qo01428f), 2024-01-01

## Supporting Information

### **Pd(II)-catalyzed B(9)-alkynylation of *o*-carboranes and *m*-carboranes**

Hao-Tian Zhang,<sup>a</sup> Yan Gao,<sup>b</sup> Yan-Na Ma,<sup>a\*</sup> and Xuenian Chen<sup>a,b\*</sup>

<sup>a</sup> *College of Chemistry, and Institute of Green Catalysis, Zhengzhou University, Zhengzhou, Henan, 450001 (China)*

<sup>b</sup> *School of Chemistry and Chemical Engineering, Henan Key Laboratory of Boron Chemistry and Advanced Energy Materials, Henan Normal University, Xixiang, Henan 453007 (China)*

E-mail: mayanna@zzu.edu.cn; xuenian\_chen@zzu.edu.cn.

## Table of Contents

|                                          |     |
|------------------------------------------|-----|
| 1. General Information.....              | S3  |
| 2. Structure of starting carboranes..... | S3  |
| 3. Experimental Section .....            | S3  |
| 4. Mechanistic study.....                | S5  |
| 5. Characterization data.....            | S6  |
| 6. References.....                       | S13 |
| 7. NMR Spectra.....                      | S14 |

## 1. General Information

$^1\text{H}$ ,  $^{13}\text{C}$ ,  $^{11}\text{B}$ , and  $^{19}\text{F}$  NMR spectra were recorded on Bruker Advance III600 spectrometer at 600, 151, 193, and 565 MHz, respectively. All chemical shifts were reported in  $\delta$  units with references to the residual solvent resonances of the deuterated solvents for proton and carbon chemical shifts, and to external  $\text{BF}_3 \cdot \text{OEt}_2$  (0.00 ppm) for boron chemical shifts. High-Resolution Mass Spectra (HRMS (ESI-TOF)) were recorded on a Bruker Mass spectrometer using ESI-TOF (electrospray ionization-time of flight). GC-MS analyses were performed on SHIMADZU GCMS-QP 2020. Triisopropylsilylacetylenyl bromide can be purchased in the market. Starting *o*-carborane **1b**, 1,2-Ph<sub>2</sub>-*o*-carborane **1i**, *m*-carborane **1k** were purchased from Zhengzhou Yuanli technology. Carboranes **1a**, **1c**-**1h**, **1j**, **1l**-**1q**, **1r**, **1s**, **1t**, **1u**-**1w**, **1x**<sup>7</sup> were prepared according to literature procedures. All other chemicals were purchased from Aldrich, Acros Organics, J&K Chemicals, Energy Chemical, Aladdin, Macklin, or TCI and used without further purification. Thin-layer chromatography (TLC) was performed using 60 mesh silica gel plates visualized with short-wavelength UV light (254 nm).

## 2. Structure of starting carboranes

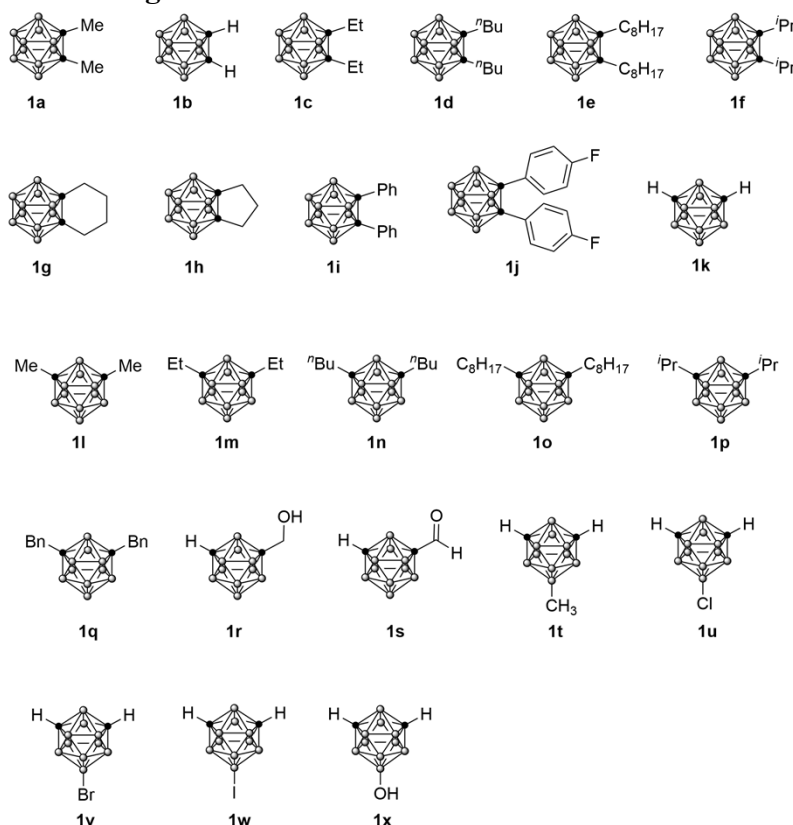

## 3. Experimental Section

### 3.1 General procedure for the B(9)-alkynylation of *o/m*-carboranes

Carborane **1** (0.20 mmol), (bromoethynyl)triisopropylsilane **2a** (2.0 equiv, 0.40 mmol),  $\text{Pd}(\text{OAc})_2$  (10 mol%, 0.02 mmol),  $\text{AgPF}_6$  (3.0 equiv, 0.60 mmol) were mixed in TFA (1 ml). The resulting mixture was stirred in a closed flask at room temperature for 24 h under air atmosphere. After removal of organic solvents under reduced pressure, the residue was subjected to flash column chromatography on silica gel (200-300 mesh) to give the product.

### 3.2 Synthesis of terminal alkyne **4**

Compound **31** (354 mg, 1 mmol) and TBAF (2 mL, 2 mmol, 1M in THF) were mixed in THF (5 mL). The resulting mixture was stirred at 0 °C for 1 h. After hydrolysis with water (20 mL) and extraction with ethyl acetate (20 mL x 3), the organic layers were combined and concentrated to dryness in vacuo. The residue was subjected to flash column chromatography to give the product **4**.

### 3.3 Synthesis of **5**

*N,N*-dimethyl aniline (51 mg, 0.42 mmol) was added to the reaction mixture of **4** (39.2mg, 0.2 mmol) and B<sub>10</sub>H<sub>14</sub> (26 mg, 0.21 mmol) in toluene. Then the reaction mixture was stirred at 115 °C for 24 hours. After cooling to room temperature, water (10 mL) was added to the mixture and extracted with ethyl acetate (10 mL x 3). The organic layers were combined and concentrated to dryness in vacuo. The residue was subjected to flash column chromatography to give the product **5**.

### 3.4 Synthesis of **6**

To a mixture of PPh<sub>3</sub> (52.4 mg, 0.2 mmol) and terminal alkyne **4** (39.2 mg, 0.2 mmol) in DCM (2.0 mL) was added NBS (71.2 mg, 0.4 mmol). The reaction mixture was stirring at room temperature for 6 hours. After removal of the solvent with a rotary evaporator, the residue was purified by column chromatography to give the product **6**. The reaction requires the recovery of raw materials and repeat again.

### 3.5 Synthesis of **7**

Compound **4** (39.2 mg, 0.2 mmol), PhI (81.6 mg, 0.4 mmol), Pd(PPh<sub>3</sub>)Cl<sub>2</sub> (7.0 mg, 0.01 mmol), CuI (3.8 mg, 0.02 mmol) and NEt<sub>3</sub> (1 mL) were mixed in toluene (4 mL). The resulting mixture was heated at 80 °C for 12 h. After hydrolysis with water (10 mL) and extraction with ethyl acetate (10 mL x 3), the organic layers were combined and concentrated to dryness in vacuo. The residue was purified by column chromatography to give the product **7**.

### 3.6 Synthesis of **8**

Compound **4** (58.8 mg, 0.3 mmol), CrO<sub>3</sub> (178.2 mg, 1.8 mmol, 6 eq), H<sub>2</sub>SO<sub>4</sub> (16 μL, 0.3 mmol, 1 eq), were mixed in HOAc (1.5 mL), The resulting mixture was stirring at room temperature for 1 h, quenching the mixture with saturated NaHCO<sub>3</sub>, and extracting with EA (10 mL x 3). The residue was purified by column chromatography to give the product **8**.

### 3.6 Synthesis of **9 and 10**

Under N<sub>2</sub> atmosphere, *n*-BuLi (1.38 ml, 1.6 M / hexane, 2.2 mmol) was added to the solution of **4** in THF (20 mL) at -78 °C. After that, the reaction mixture was warmed up to room temperature and stirred for 1 hour. Then the mixture was cooled to -78 °C, benzaldehyde (224 μL, 2.2 mmol) or acetone (163μL, 2 mmol) in THF (10 mL) was added. The reaction was slowly warmed up to room temperature and was stirred for 1 hour. Saturated aqueous solution of NH<sub>4</sub>Cl was added, and extract the aqueous layer with Et<sub>2</sub>O. Dry the organic phase over Na<sub>2</sub>SO<sub>4</sub>. Filter the mixture and concentrate in vacuo. Purify the crude product by flash column chromatography on silica gel to obtain the final product.

### 3.7 Synthesis of product **11**

To a solution of alkyne (39.2 mg, 0.2 mmol) in acetone (50 mL) was added N-bromosuccinimide (3.36 mg, 0.02 mmol) and AgNO<sub>3</sub> (39.16 mg, 0.22 mmol). The reaction mixture was stirred at room



temperature under exclusion of light for 2 h. Upon completion the reaction mixture was concentrated under reduced pressure and filtered through a celite plug to afford crude **11** which was submitted to the next step without further purification.

#### 4. Mechanistic study

(a) 1,2-Me<sub>2</sub>-*o*-carborane **1a** (0.1 mmol) was stirred in CF<sub>3</sub>COOH (1 mL) at room temperature for 30 minutes; (b) 1,2-Me<sub>2</sub>-*o*-carborane **1a** (0.1 mmol) and Pd(OAc)<sub>2</sub> (0.01 mmol, 10 mol%) were stirred in CF<sub>3</sub>COOH (1 mL) at room temperature for 30 minutes; (c) 1,2-Me<sub>2</sub>-*o*-carborane **1a** (0.1 mmol), Pd(OAc)<sub>2</sub> (0.01 mmol, 10 mol%) and AgPF<sub>6</sub> (0.3 mmol) were stirred in CF<sub>3</sub>COOH (1 mL) at room temperature for 30 minutes; (d) 1,2-Me<sub>2</sub>-*o*-carborane **1a** (0.1 mmol) and AgPF<sub>6</sub> (0.3 mmol) were stirred in CF<sub>3</sub>COOH (1 mL) at room temperature for 30 minutes.

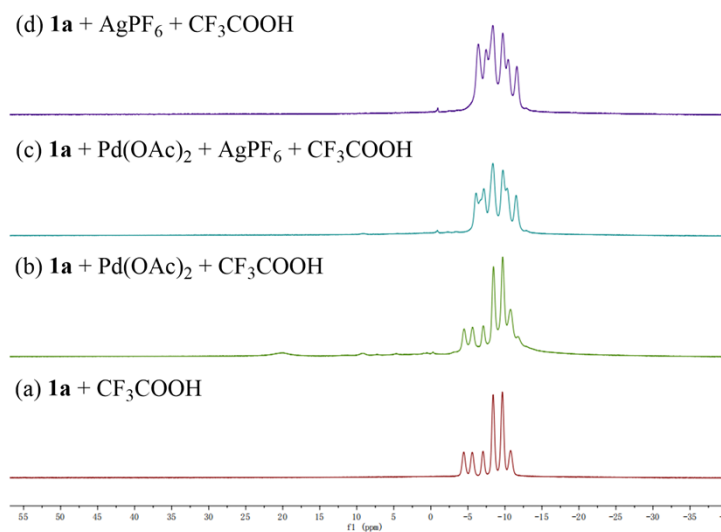

Figure S1 <sup>11</sup>B NMR.

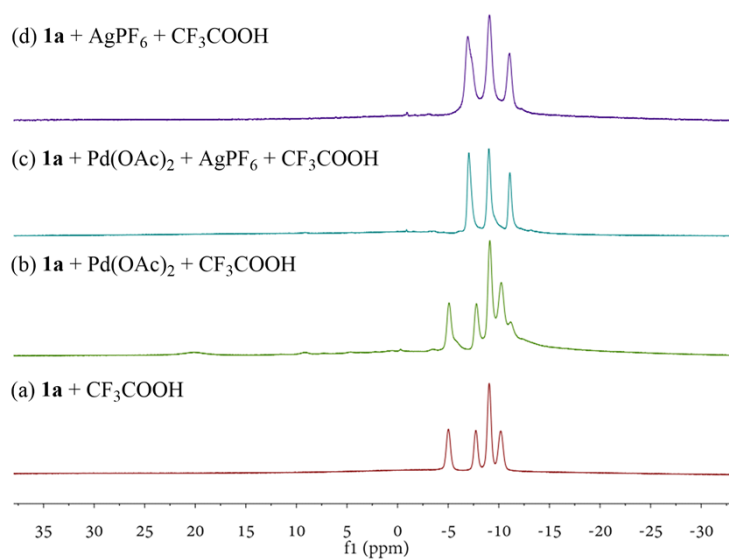

Figure S2 <sup>11</sup>B{<sup>1</sup>H} NMR

## 5. Characterization data

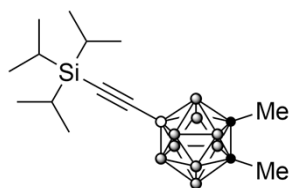

**3a.** Yield 60% . Yellow liquid. **Eluent:** PE:EA = 20:1

**<sup>1</sup>H NMR (400 MHz, CDCl<sub>3</sub>)** δ 2.02 (d, *J* = 3.5 Hz, 7H), 1.16 – 0.94 (m, 21H). **<sup>13</sup>C NMR (101 MHz, CDCl<sub>3</sub>)** δ 29.73, 18.57, 11.33. **<sup>11</sup>B{<sup>1</sup>H} NMR (128 MHz, CDCl<sub>3</sub>)** δ -4.55 (2B), -7.50 (6B), 11.93 (2B). **HRMS(ESI-TOF):** *m/z* calcd for C<sub>15</sub><sup>10</sup>B<sub>2</sub><sup>11</sup>B<sub>8</sub>H<sub>36</sub>Si [M+Na]<sup>+</sup>: 375.3490. Found: 375.3463.

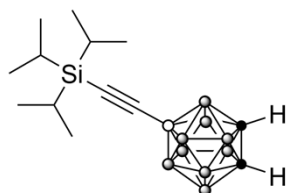

**3b.** Yield 59% . Yellow liquid. **Eluent:** PE:EA = 20:1

**<sup>1</sup>H NMR (400 MHz, CDCl<sub>3</sub>)** δ 3.58 – 3.36 (m, 2H), 1.16 – 0.95 (m, 21H). **<sup>13</sup>C NMR (101 MHz, CDCl<sub>3</sub>)** δ 52.75, 49.30, 29.73, 18.63, 11.26. **<sup>11</sup>B{<sup>1</sup>H} NMR (128 MHz, CDCl<sub>3</sub>)** δ -1.75 (1B), -2.46 (1B), -8.45 (2B), -13.39 (2B), -14.56 (2B), -15.66 (2B).

**HRMS(ESI-TOF):** *m/z* calcd for C<sub>13</sub><sup>10</sup>B<sub>2</sub><sup>11</sup>B<sub>8</sub>H<sub>29</sub>Si [M+Na]<sup>+</sup>: 347.3176. Found: 347.3177.

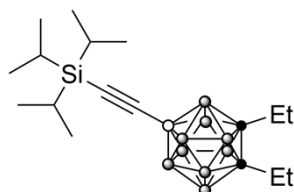

**3c.** Yield 61% . Yellow liquid. **Eluent:** PE:EA = 20:1

**<sup>1</sup>H NMR (400 MHz, CDCl<sub>3</sub>)** δ 2.22 (dq, *J* = 7.6, 1.3 Hz, 5H), 1.24 – 1.12 (m, 7H), 1.11 – 0.96 (m, 21H). **<sup>13</sup>C NMR (101 MHz, CDCl<sub>3</sub>)** δ 75.48, 28.55, 27.88, 18.64, 14.08, 14.00, 11.30. **<sup>11</sup>B{<sup>1</sup>H} NMR (128 MHz, CDCl<sub>3</sub>)** δ -4.33 (2B) -9.64 (2B) -10.79 (4B) -11.94 (2B).

**HRMS(ESI-TOF):** *m/z* calcd for C<sub>17</sub><sup>10</sup>B<sub>2</sub><sup>11</sup>B<sub>8</sub>H<sub>40</sub>Si [M+Na]<sup>+</sup>: 403.3804. Found: 403.3804.

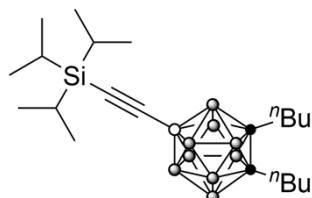

**3d.** Yield 62% . Yellow liquid. **Eluent:** PE:EA = 20:1

**<sup>1</sup>H NMR (400 MHz, CDCl<sub>3</sub>)** δ 2.16 – 2.07 (m, 5H), 1.56 – 1.45 (m, 6H), 1.31 (dtd, *J* = 14.6, 7.5, 2.8 Hz, 5H), 1.08 – 0.98 (m, 21H), 0.92 (td, *J* = 7.3, 4.7 Hz, 6H). **<sup>13</sup>C NMR (101 MHz, CDCl<sub>3</sub>)** δ 74.69, 34.83, 34.15, 31.82, 31.70, 22.43, 18.64, 13.64, 11.30. **<sup>11</sup>B{<sup>1</sup>H} NMR (128 MHz, CDCl<sub>3</sub>)** δ -4.36 (2B), -9.67 (2B), -10.87 (4B), -11.79 (2B).

**HRMS(ESI-TOF):** *m/z* calcd for C<sub>21</sub><sup>10</sup>B<sub>1</sub><sup>11</sup>B<sub>9</sub>H<sub>48</sub>Si [M+Na]<sup>+</sup>: 460.4402. Found: 460.4395.

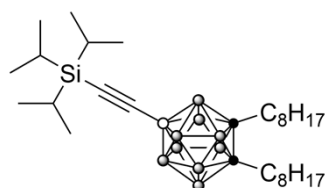

**3e.** Yield 63%. Yellow liquid. **Eluent:** PE:EA = 20:1

**<sup>1</sup>H NMR (400 MHz, CDCl<sub>3</sub>)** δ 2.15 – 2.03 (m, 5H), 1.59 – 1.47 (m, 5H), 1.27 (s, 20H), 1.04 (d, *J* = 5.1 Hz, 20H), 0.88 (t, *J* = 6.1 Hz, 6H). **<sup>13</sup>C NMR (101 MHz, CDCl<sub>3</sub>)** δ 74.73, 35.09, 34.42, 31.75, 29.75, 29.65, 29.26, 29.09, 22.61, 18.64, 14.06, 11.30. **<sup>11</sup>B{<sup>1</sup>H} NMR (128 MHz, CDCl<sub>3</sub>)** δ -4.58 (2B), -11.56 (8B).

**HRMS(ESI-TOF):** *m/z* calcd for C<sub>29</sub><sup>10</sup>B<sub>1</sub><sup>11</sup>B<sub>9</sub>H<sub>64</sub>Si [M+Na]<sup>+</sup>: 572.5660. Found: 572.5663.

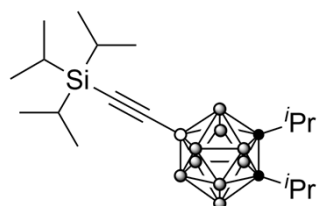

**3f.** Yield 47%. Yellow liquid. **Eluent:** PE:EA = 20:1

**<sup>1</sup>H NMR (400 MHz, CDCl<sub>3</sub>)** δ 2.29 (dq, *J* = 13.8, 6.9, 5.9, 4.0 Hz, 3H), 1.21 (dd, *J* = 8.8, 6.9 Hz, 12H), 1.14 – 0.92 (m, 21H). **<sup>13</sup>C NMR (101 MHz, CDCl<sub>3</sub>)** δ 86.97, 83.27, 30.71, 30.24, 24.45, 24.32, 18.66, 11.30. **<sup>11</sup>B{<sup>1</sup>H} NMR (128 MHz, CDCl<sub>3</sub>)** δ -3.85 (2B), -8.68 (2B), -11.65 (2B) -12.78 (4B).

**HRMS(ESI-TOF):** *m/z* calcd for C<sub>19</sub><sup>10</sup>B<sub>1</sub><sup>11</sup>B<sub>9</sub>H<sub>44</sub>Si [M+Na]<sup>+</sup>: 432.4088 Found: 432.4089.

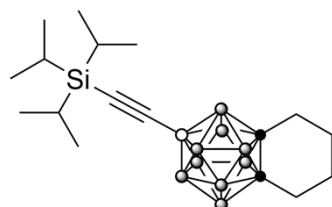

**3g.** Yield 48%. Yellow liquid. **Eluent:** PE:EA = 20:1

**<sup>1</sup>H NMR (400 MHz, CDCl<sub>3</sub>)** δ 2.42-2.43 (m, 4H), 1.56-1.58 (m, 4H), 1.08 – 0.96 (m, 21H). **<sup>13</sup>C NMR (101 MHz, CDCl<sub>3</sub>)** δ 71.48, 68.10, 32.75, 32.19, 19.74, 19.55, 18.64, 18.46, 11.28. **<sup>11</sup>B{<sup>1</sup>H} NMR (128 MHz, CDCl<sub>3</sub>)** δ -5.12 (2B), -8.39 (2B), -9.33 (2B), -10.45 (2B), -12.48 (2B).

**HRMS(ESI-TOF):** *m/z* calcd for C<sub>17</sub><sup>10</sup>B<sub>2</sub><sup>11</sup>B<sub>8</sub>H<sub>38</sub>Si [M+Na]<sup>+</sup>: 401.3648. Found: 401.3649.

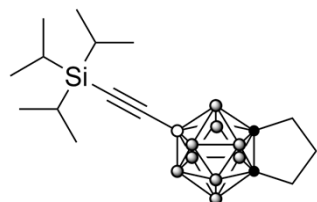

**3h.** Yield 45%. Yellow liquid. **Eluent:** PE:EA = 20:1

**<sup>1</sup>H NMR (400 MHz, CDCl<sub>3</sub>)** δ 2.47 – 2.31 (m, 6H), 1.02 – 0.90 (m, 21H). **<sup>13</sup>C NMR (101 MHz, CDCl<sub>3</sub>)** δ 82.48, 34.51, 34.01, 32.21, 18.64, 11.28. **<sup>11</sup>B{<sup>1</sup>H} NMR (128 MHz, CDCl<sub>3</sub>)** δ -5.97 (2B), -7.24 (2B), -9.91 (2B), -11.41 (2B), -12.56 (2B).

**HRMS(ESI-TOF):** *m/z* calcd for C<sub>16</sub><sup>10</sup>B<sub>2</sub><sup>11</sup>B<sub>8</sub>H<sub>36</sub>Si [M+Na]<sup>+</sup>: 387.3491. Found: 387.3506.

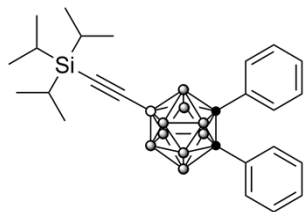

**3i.** Yield 34%. Yellow liquid. **Eluent:** PE

**<sup>1</sup>H NMR (400 MHz, CDCl<sub>3</sub>)** δ 7.41 (dq, *J* = 7.2, 1.5 Hz, 3H), 7.26 – 7.20 (m, 2H), 7.16 – 7.10 (m, 3H), 1.19 – 0.96 (m, 21H). **<sup>13</sup>C NMR (101 MHz, CDCl<sub>3</sub>)** δ 130.72, 130.61, 130.24, 128.29, 83.64, 18.66, 11.28. **<sup>11</sup>B{<sup>1</sup>H} NMR (128 MHz, CDCl<sub>3</sub>)** δ -2.09 (2B), -9.54 (6B) -12.04 (2B).

**HRMS(ESI-TOF):** *m/z* calcd for C<sub>25</sub><sup>10</sup>B<sub>1</sub><sup>11</sup>B<sub>9</sub>H<sub>40</sub>Si [M+Na]<sup>+</sup>: 500.3780. Found: 500.3774.

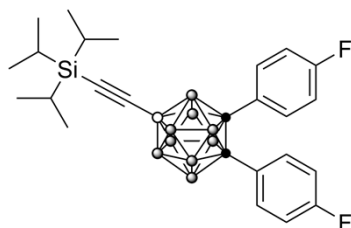

**3j.** Yield 28%. Yellow liquid. **Eluent:** PE:EA = 20:1

**<sup>1</sup>H NMR (400 MHz, CDCl<sub>3</sub>)** δ 7.30 – 7.05 (m, 6H), 6.99 – 6.85 (m, 2H), 0.98 (d, *J* = 4.7 Hz, 21H). **<sup>13</sup>C NMR (101 MHz, CDCl<sub>3</sub>)** δ 163.29, 160.83, 132.41, 132.32, 132.24, 130.07, 130.06, 129.99, 129.98, 126.51, 126.48, 126.39, 126.36, 118.20, 118.09, 117.96, 117.84, 117.79, 117.58, 82.16, 18.64, 11.25. **<sup>19</sup>F NMR (376 MHz, CDCl<sub>3</sub>)** δ -111.43. **<sup>11</sup>B{<sup>1</sup>H} NMR (128 MHz, CDCl<sub>3</sub>)** δ -1.60 (2B), -9.35 (6B), -12.08 (2B).

**HRMS(ESI-TOF):** *m/z* calcd for C<sub>25</sub><sup>10</sup>B<sub>1</sub><sup>11</sup>B<sub>9</sub>H<sub>38</sub>SiF<sub>2</sub> [M+Na]<sup>+</sup>: 536.3591. Found: 536.3582.

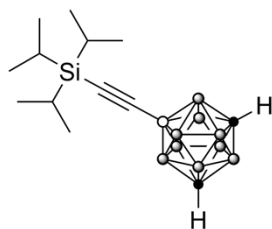

**3k.** Yield 48%. Yellow liquid. **Eluent:** PE

**<sup>1</sup>H NMR (400 MHz, CDCl<sub>3</sub>)** δ 2.88 (s, 2H), 1.13 – 0.99 (m, 21H). **<sup>13</sup>C NMR (101 MHz, CDCl<sub>3</sub>)** δ 29.71, 18.63, 11.27. **<sup>11</sup>B{<sup>1</sup>H} NMR (128 MHz, CDCl<sub>3</sub>)** δ -6.08 (2B), -9.52 (2B), -12.80 (2B), -14.12 (2B), -17.81 (1B), -19.69 (1B)

**HRMS(ESI-TOF):** *m/z* calcd for C<sub>13</sub><sup>10</sup>B<sub>2</sub><sup>11</sup>B<sub>8</sub>H<sub>32</sub>Si [M+Na]<sup>+</sup>: 347.3176. Found: 347.3150.

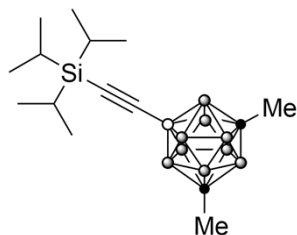

**3l.** Yield 64%. Yellow liquid. **Eluent:** PE

**<sup>1</sup>H NMR (400 MHz, CDCl<sub>3</sub>)** δ 1.52 (s, 6H), 0.98 – 0.79 (m, 21H). **<sup>13</sup>C NMR (101 MHz, CDCl<sub>3</sub>)** δ 24.33, 18.65, 11.28. **<sup>11</sup>B{<sup>1</sup>H} NMR (128 MHz, CDCl<sub>3</sub>)** δ -6.80 (2B), -9.47 (4B), -10.88 (2B), -12.94 (1B), -15.88 (1B).

**HRMS(ESI-TOF):** m/z calcd for C<sub>15</sub><sup>10</sup>B<sub>2</sub><sup>11</sup>B<sub>8</sub>H<sub>36</sub>Si [M+Na]<sup>+</sup>: 375.3490. Found: 375.3485.

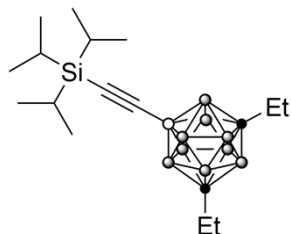

**3m.** Yield 59%. Yellow liquid. **Eluent:** PE

**<sup>1</sup>H NMR (400 MHz, CDCl<sub>3</sub>)** δ 1.98 (q, *J* = 7.6 Hz, 4H), 1.17 – 1.00 (m, 21H), 0.97 (t, *J* = 7.6 Hz, 6H). **<sup>13</sup>C NMR (101 MHz, CDCl<sub>3</sub>)** δ 30.31, 18.66, 14.25, 11.30. **<sup>11</sup>B{<sup>1</sup>H} NMR (128 MHz, CDCl<sub>3</sub>)** δ -6.94 (2B), -10.18 (2B), -10.81 (2B), -12.19 (2B), -14.63 (1B), -16.08 (1B).

**HRMS(ESI-TOF):** m/z calcd for C<sub>17</sub><sup>10</sup>B<sub>2</sub><sup>11</sup>B<sub>8</sub>H<sub>40</sub>Si [M+Na]<sup>+</sup>: 403.3804. Found: 403.3790.

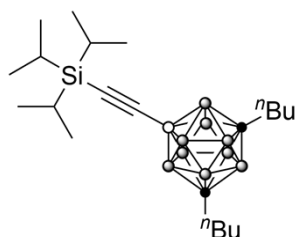

**3n.** Yield 61%. Yellow liquid. **Eluent:** PE

**<sup>1</sup>H NMR (400 MHz, CDCl<sub>3</sub>)** δ 1.92 – 1.86 (m, 4H), 1.32 (ddd, *J* = 12.1, 6.0, 3.1 Hz, 4H), 1.25 – 1.19 (m, 4H), 1.13 – 0.99 (m, 20H), 0.87 (t, *J* = 7.2 Hz, 6H). **<sup>13</sup>C NMR (101 MHz, CDCl<sub>3</sub>)** δ 36.73, 32.03, 22.33, 18.66, 13.70, 11.30. **<sup>11</sup>B{<sup>1</sup>H} NMR (128 MHz, CDCl<sub>3</sub>)** δ -6.82 (2B), -10.38 (4B), -12.10 (2B), -14.54 (1B), -16.02 (1B).

**HRMS(ESI-TOF):** m/z calcd for C<sub>21</sub><sup>10</sup>B<sub>1</sub><sup>11</sup>B<sub>9</sub>H<sub>48</sub>Si [M+Na]<sup>+</sup>: 460.4402. Found: 460.4394.

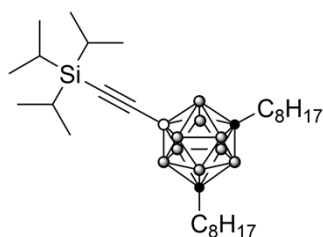

**3o.** Yield 62%. Yellow liquid. **Eluent:** PE

**<sup>1</sup>H NMR (400 MHz, CDCl<sub>3</sub>)** δ 1.92 – 1.85 (m, 4H), 1.37 – 1.16 (m, 24H), 1.13 – 1.03 (m, 21H), 0.88 (t, *J* = 6.9 Hz, 6H). **<sup>13</sup>C NMR (101 MHz, CDCl<sub>3</sub>)** δ 36.98, 31.78, 29.95, 29.17, 29.14, 22.62, 18.66, 14.08, 11.30. **<sup>11</sup>B{<sup>1</sup>H} NMR (128 MHz, CDCl<sub>3</sub>)** δ -6.81 (2B), -10.32 (4B), -10.47 (4B), -14.15 (2B).

**HRMS(ESI-TOF):** m/z calcd for C<sub>29</sub><sup>10</sup>B<sub>1</sub><sup>11</sup>B<sub>9</sub>H<sub>64</sub>Si [M+Na]<sup>+</sup>: 572.5660. Found: 572.5675.

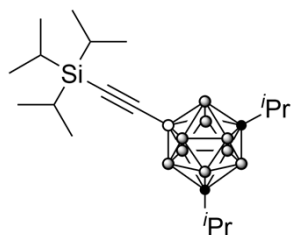

**3p.** Yield 48% . Yellow liquid. **Eluent:** PE

$^1\text{H NMR}$  (400 MHz,  $\text{CDCl}_3$ )  $\delta$  2.19 – 2.14 (m, 2H), 1.11 – 1.04 (m, 21H), 1.03 (s, 6H), 1.02 (s, 6H).  $^{13}\text{C NMR}$  (101 MHz,  $\text{CDCl}_3$ )  $\delta$  80.23, 33.81, 23.89, 18.67, 11.31.  $^{11}\text{B}\{^1\text{H}\}$  NMR (128 MHz,  $\text{CDCl}_3$ )  $\delta$  - 6.61 (2B), -10.54 (2B), -11.49 (2B), -12.87 (2B), -15.26 (1B), -16.69 (1B).

**HRMS(ESI-TOF):**  $m/z$  calcd for  $\text{C}_{19}^{10}\text{B}_1^{11}\text{B}_9\text{H}_{44}\text{Si}$   $[\text{M}+\text{Na}]^+$ : 432.4088. Found: 432.4081.

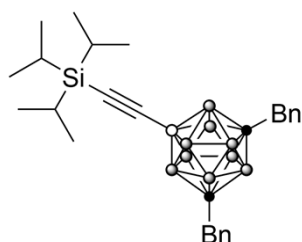

**3q.** Yield 38%. Yellow liquid. **Eluent:** PE

$^1\text{H NMR}$  (400 MHz,  $\text{CDCl}_3$ )  $\delta$  7.29 (d,  $J = 1.9$  Hz, 2H), 7.27 (d,  $J = 2.0$  Hz, 3H), 7.05 – 7.02 (m, 3H), 3.12 (s, 4H), 2.44 – 2.04 (m, 9H), 1.06 (d,  $J = 4.7$  Hz, 21H).  $^{13}\text{C NMR}$  (101 MHz,  $\text{CDCl}_3$ )  $\delta$  136.82, 129.83, 128.39, 127.51, 42.97, 29.73, 18.66, 11.28.  $^{11}\text{B}\{^1\text{H}\}$  NMR (128 MHz,  $\text{CDCl}_3$ )  $\delta$  -6.33 (2B), - 9.85 (4B), -11.94 (2B), -14.76 (1B), -16.36 (1B).

**HRMS(ESI-TOF):**  $m/z$  calcd for  $\text{C}_{27}^{10}\text{B}_1^{11}\text{B}_9\text{H}_{44}\text{Si}$   $[\text{M}+\text{Na}]^+$ : 528.4094. Found: 528.4082.

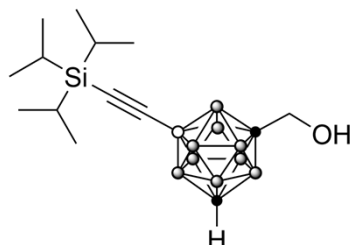

**3r.** Yield 37%. Yellow liquid. **Eluent:** PE

$^1\text{H NMR}$  (400 MHz,  $\text{CDCl}_3$ )  $\delta$  4.28 (s, 1H), 2.91 (s, 1H), 2.09 (s, 2H), 1.06 (s, 21H).  $^{13}\text{C NMR}$  (101 MHz,  $\text{CDCl}_3$ )  $\delta$  64.21, 20.46, 18.62, 11.26.  $^{11}\text{B}\{^1\text{H}\}$  NMR (128 MHz,  $\text{CDCl}_3$ )  $\delta$  -4.05 (2B), -20.30 – - 10.09 (8B).

**HRMS(ESI-TOF):**  $m/z$  calcd for  $\text{C}_{14}^{10}\text{B}_2^{11}\text{B}_8\text{H}_{34}\text{SiO}$   $[\text{M}+\text{Na}]^+$ : 377.3282. Found: 377.3242.

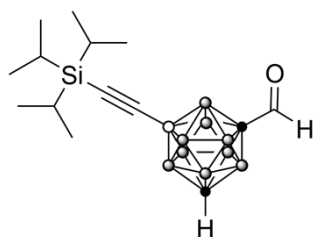

**3s.** Yield 33%. Yellow liquid. **Eluent:** PE

$^1\text{H}$  NMR (400 MHz,  $\text{CDCl}_3$ )  $\delta$  9.05 (s, 1H), 3.04 (s, 1H), 1.07 (d,  $J$  = 3.9 Hz, 21H).  $^{13}\text{C}$  NMR (101 MHz,  $\text{CDCl}_3$ )  $\delta$  185.04, 54.02, 18.62, 11.22.  $^{11}\text{B}\{^1\text{H}\}$  NMR (128 MHz,  $\text{CDCl}_3$ )  $\delta$  -5.77 (2B), -9.22 (2B), -12.13 (2B), -13.42 (2B), -17.16 (1B), -18.95 (1B).

HRMS(ESI-TOF):  $m/z$  calcd for  $\text{C}_{14}^{10}\text{B}_2^{11}\text{B}_8\text{H}_{32}\text{SiO}$   $[\text{M}+\text{H}]^+$ : 375.3126. Found: 375.3216.

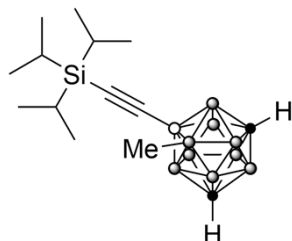

**3t.** Yield 27%. Yellow liquid. **Eluent:** PE

$^1\text{H}$  NMR (400 MHz,  $\text{CDCl}_3$ )  $\delta$  2.81 (s, 2H), 1.15 – 0.98 (m, 21H), 0.42 (s, 3H).  $^{13}\text{C}$  NMR (101 MHz,  $\text{CDCl}_3$ )  $\delta$  52.23, 18.65, 11.24.  $^{11}\text{B}\{^1\text{H}\}$  NMR (128 MHz,  $\text{CDCl}_3$ )  $\delta$  -0.01 (2B), -5.49 (2B), -9.12 (1B), -13.63 (3B), -20.00 (1B), -21.46 (1B).

HRMS(ESI-TOF):  $m/z$  calcd for  $\text{C}_{14}^{10}\text{B}_2^{11}\text{B}_8\text{H}_{34}\text{Si}$   $[\text{M}+\text{Na}]^+$ : 349.3332. Found: 349.3307.

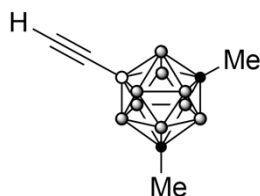

**4.** Yield 60%. White solid. Melting point: 46 – 48 °C. **Eluent:** PE

$^1\text{H}$  NMR (400 MHz,  $\text{CDCl}_3$ )  $\delta$  3.40 (s, 1H), 1.72 (s, 6H).  $^{13}\text{C}$  NMR (101 MHz,  $\text{CDCl}_3$ )  $\delta$  70.82, 61.24, 24.28.  $^{11}\text{B}\{^1\text{H}\}$  NMR (128 MHz,  $\text{CDCl}_3$ )  $\delta$  -6.82 (2B), -9.64 (3B), -10.64 (3B), -12.75 (1B), -14.04 (1B).

HRMS(ESI-TOF):  $m/z$  calcd for  $\text{C}_6^{10}\text{B}_2^{11}\text{B}_8\text{H}_{16}$   $[\text{M}+\text{H}]^+$ : 197.2331. Found: 197.2321.

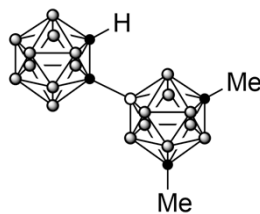

**5.** Yield 77%. White solid. Melting point: 230 – 232 °C. **Eluent:** PE:DCM = 5:1

$^1\text{H}$  NMR (400 MHz,  $\text{CDCl}_3$ )  $\delta$  3.40 (s, 1H), 1.72 (s, 6H).  $^{13}\text{C}$  NMR (101 MHz,  $\text{CDCl}_3$ )  $\delta$  70.82, 61.24, 24.28.  $^{11}\text{B}\{^1\text{H}\}$  NMR (128 MHz,  $\text{CDCl}_3$ )  $\delta$  -1.77 (1B), -2.78 (1B), -7.13 (1B), -8.16 (1B), -12.76 – -9.73 (5B), -14.09 (1B).

HRMS(ESI-TOF):  $m/z$  calcd for  $\text{C}_6^{10}\text{B}_4^{11}\text{B}_{16}\text{H}_{26}$   $[\text{M}+\text{H}]^+$ : 315.4117. Found: 315.4096.

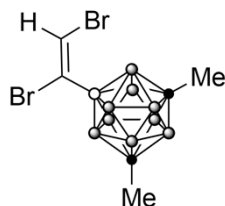

6. Yield 60%. Yellow solid. Melting point: 53 – 55°C. **Eluent:** PE

**<sup>1</sup>H NMR** (400 MHz, CDCl<sub>3</sub>) δ 7.08 (d, *J* = 9.1 Hz, 1H), 1.73 (s, 6H). **<sup>13</sup>C NMR** (101 MHz, CDCl<sub>3</sub>) δ 111.06, 70.18, 24.48. **<sup>11</sup>B{<sup>1</sup>H} NMR** (128 MHz, CDCl<sub>3</sub>) δ -2.85 (1B), -6.74 (2B), -9.48 (3B), -10.71 (2B), -12.89 (2B).

**HRMS(ESI-TOF):** *m/z* calcd for C<sub>6</sub><sup>110</sup>B<sub>2</sub><sup>11</sup>B<sub>8</sub>H<sub>16</sub>Br<sub>2</sub> [M+H]<sup>+</sup>: 356.0597. Found: 356.0519.

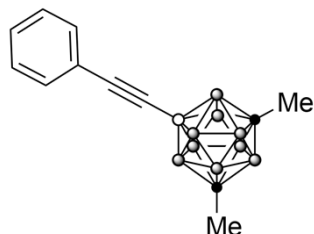

7. Yield 90%. Yellow liquid. **Eluent:** PE

**<sup>1</sup>H NMR** (400 MHz, CDCl<sub>3</sub>) δ 7.43 – 7.33 (m, 2H), 7.25 – 7.14 (m, 3H), 1.65 (s, 6H). **<sup>13</sup>C NMR** (101 MHz, CDCl<sub>3</sub>) δ 130.88, 127.00, 126.82, 122.96, 68.95, 23.34. **<sup>11</sup>B{<sup>1</sup>H} NMR** (128 MHz, CDCl<sub>3</sub>) δ -6.86 (2B), -9.46 (3B), -10.72 (3B), -12.79 (1B), -14.24 (1B).

**HRMS(ESI-TOF):** *m/z* calcd for C<sub>12</sub><sup>10</sup>B<sub>2</sub><sup>11</sup>B<sub>8</sub>H<sub>20</sub> [M+H]<sup>+</sup>: 273.2647 Found: 273.2628.

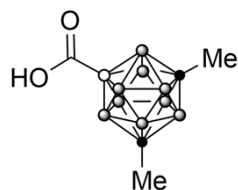

8. Yield 65%. White solid. Melting point: 169 – 170 °C. **Eluent:** EA

**<sup>1</sup>H NMR** (400 MHz, CDCl<sub>3</sub>) δ 1.74 (s, 6H). **<sup>13</sup>C NMR** (101 MHz, CDCl<sub>3</sub>) δ 70.98, 24.25. **<sup>11</sup>B{<sup>1</sup>H} NMR** (128 MHz, CDCl<sub>3</sub>) δ -7.36 (3B), -10.09 (5B), -12.33 (2B).

**HRMS(ESI-TOF):** *m/z* calcd for C<sub>5</sub><sup>10</sup>B<sub>2</sub><sup>11</sup>B<sub>8</sub>H<sub>16</sub>O<sub>2</sub> [M+H]<sup>+</sup>: 241.2230. Found: 241.2219.

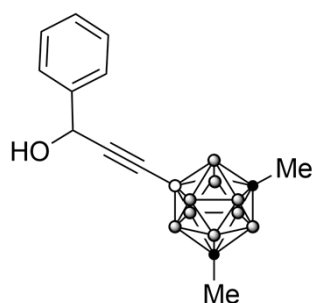

9. Yield 76% . White liquid. **Eluent:** PE:EA = 3:1

**<sup>1</sup>H NMR** (400 MHz, CDCl<sub>3</sub>) δ 7.57 (dd, *J* = 7.2, 1.8 Hz, 2H), 7.38 (dd, *J* = 8.2, 6.4 Hz, 2H), 7.34 – 7.29 (m, 1H), 5.46 (d, *J* = 6.3 Hz, 1H), 2.13 (d, *J* = 6.5 Hz, 1H), 1.71 (s, 6H). **<sup>13</sup>C NMR** (101 MHz, CDCl<sub>3</sub>) δ 128.49, 128.17, 126.89, 65.12, 24.35. **<sup>11</sup>B{<sup>1</sup>H} NMR** (128 MHz, CDCl<sub>3</sub>) δ -6.93 (2B), -9.62 (4B), -10.71 (2B), -12.71 (1B), -14.10 (1B).

**HRMS(ESI-TOF):** *m/z* calcd for C<sub>13</sub><sup>10</sup>B<sub>2</sub><sup>11</sup>B<sub>8</sub>H<sub>22</sub>O [M+Na]<sup>+</sup>: 325.2573. Found: 325.2570.



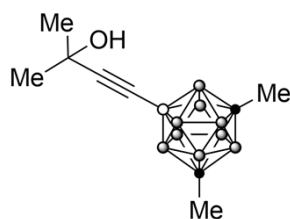

**10.** Yield 80%. White solid. Melting point: 133 – 135 °C. **Eluent:** PE:EA = 3:1  
 $^1\text{H NMR}$  (400 MHz,  $\text{CDCl}_3$ )  $\delta$  1.69 (s, 6H), 1.49 (s, 6H).  $^{13}\text{C NMR}$  (101 MHz,  $\text{CDCl}_3$ )  $\delta$  69.92, 65.45, 31.51, 24.33.  $^{11}\text{B}\{^1\text{H}\}$  NMR (128 MHz,  $\text{CDCl}_3$ )  $\delta$  -6.92, -10.17 (d,  $J = 162.4$  Hz), -13.63 (d,  $J = 191.2$  Hz).  $^{11}\text{B}\{^1\text{H}\}$  NMR (128 MHz,  $\text{CDCl}_3$ )  $\delta$  -5.92 (2B), -9.54 (4B), -10.81 (2B), -12.88 (1B), -14.37 (1B).  
**HRMS(ESI-TOF):**  $m/z$  calcd for  $\text{C}_9^{10}\text{B}_2^{11}\text{B}_8\text{H}_{23}\text{O}$   $[\text{M}+\text{H}]^+$ : 256.2829. Found: 256.2835

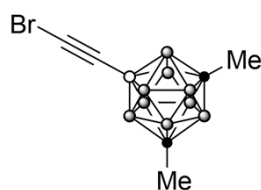

**11.** Yield 83%. Yellow solid. Melting point: 113 – 114 °C. **Eluent:** PE:DCM = 1:1  
 $^1\text{H NMR}$  (400 MHz,  $\text{CDCl}_3$ )  $\delta$  1.70 (s, 6H).  $^{13}\text{C NMR}$  (101 MHz,  $\text{CDCl}_3$ )  $\delta$  70.13, 24.33.  $^{11}\text{B}\{^1\text{H}\}$  NMR (128 MHz,  $\text{CDCl}_3$ )  $\delta$  -6.94 (2B), -9.69 (4B), -10.73 (2B), -12.83 (1B), -14.16 (1B).  
**HRMS(ESI-TOF):**  $m/z$  calcd for  $\text{C}_6^{10}\text{B}_1^{11}\text{B}_9\text{H}_{15}\text{Br}$   $[\text{M}+\text{Na}]^+$ : 298.1240. Found: 298.1269.

## 6. References

1. T. L. Heying, J. W. Ager Jr, S. L. Clark, R. P. Alexander, S. Papetti, J. A. Reid and S. I. Trotz, *Inorg. Chem.*, 1963, **2**, 1097.
2. S.-Y. Kim, Y.-J. Cho, H.-J. Son, C. H. Kim and S. O. Kang, *J. Organomet. Chem.*, 2018, **865**, 152.
3. L. Deng, H. S. Chan, Z. Xie, *J. Am. Chem. Soc.*, 2006, **128**, 7728.
4. P. Dozzo, R. A. Kasar and S. B. Kahl. *Inorg. Chem.*, 2005, **44**, 8053.
5. Z. Zheng, W. Jiang, A. A. Zinn, C. B. Knobler, M. F. Hawthorne, M. F. *Inorg. Chem.*, 1995, **34**, 2095
6. W. Lu, Y. Wu, Y.-N. Ma, F. Chen, X. Chen, *Inorg. Chem.*, 2023, **62**, 885.
7. Y.-N. Ma, H. Ren, Y. Wu, N. Li, F. Chen and X. Chen, *J. Am. Chem. Soc.*, 2023, **145**, 7331.

## 7. NMR spectra

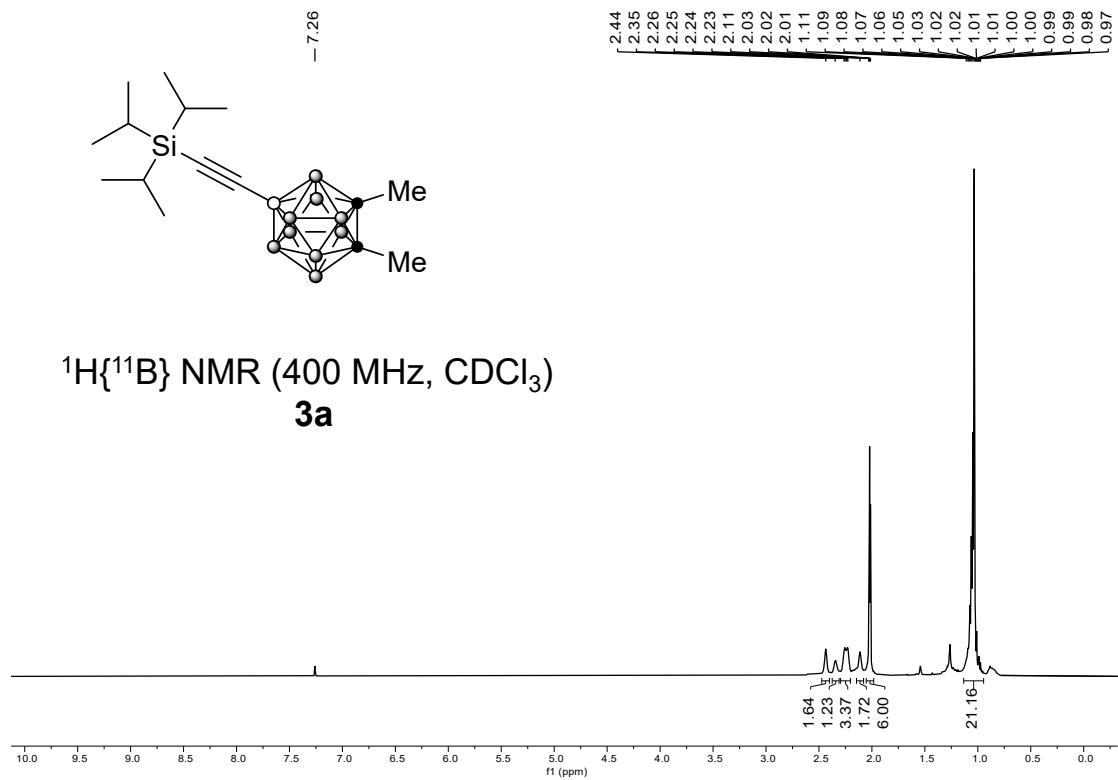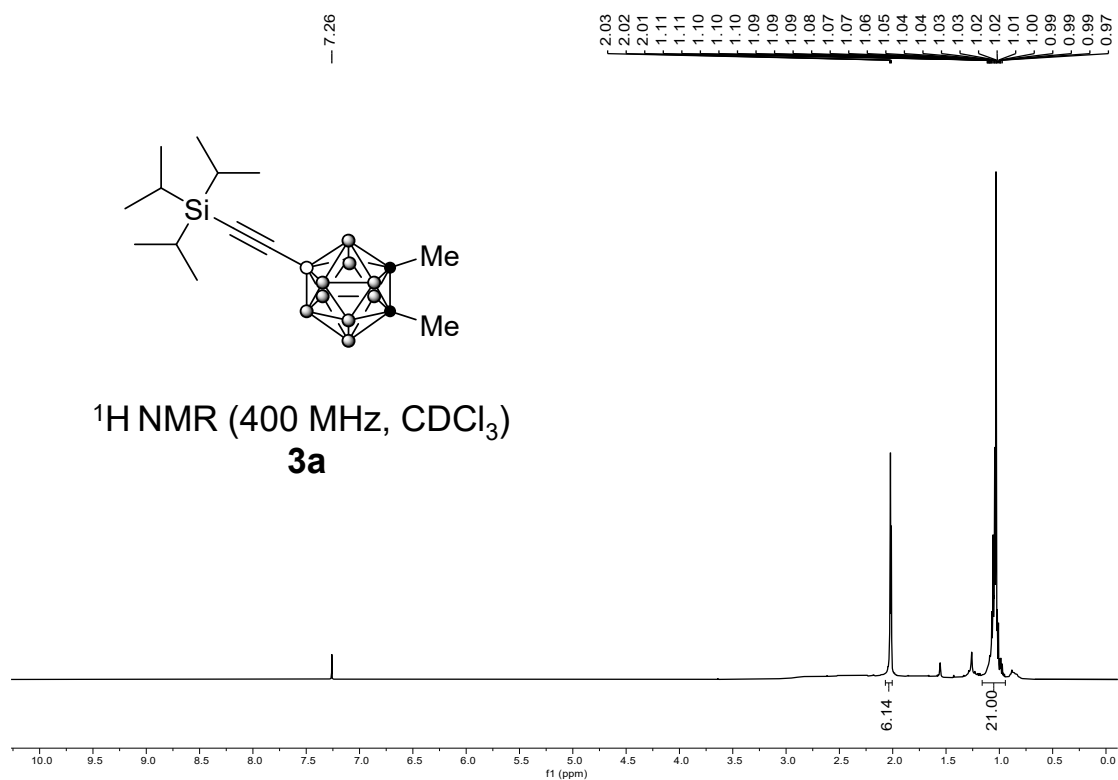

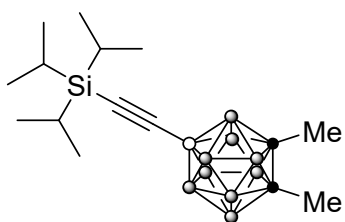

~ 29.73  
 ~ 26.93  
 ~ 18.57  
 ~ 11.33

$^{13}\text{C}$  NMR (101 MHz,  $\text{CDCl}_3$ )  
**3a**

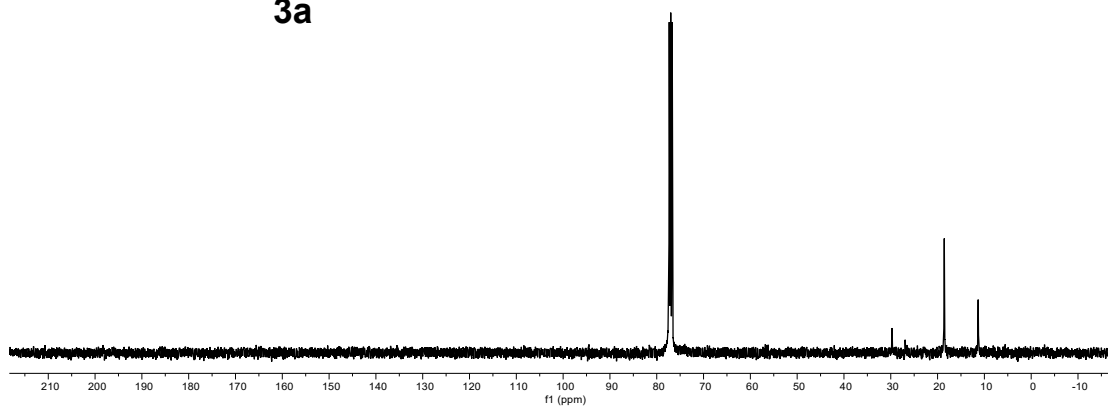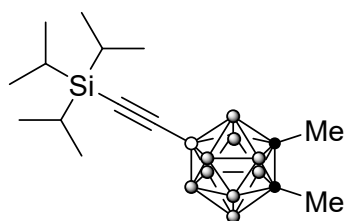

~ -4.55  
 ~ -9.37  
 ~ -9.43  
 ~ -10.34

$^{11}\text{B}\{^1\text{H}\}$  NMR (128 MHz,  $\text{CDCl}_3$ )  
**3a**

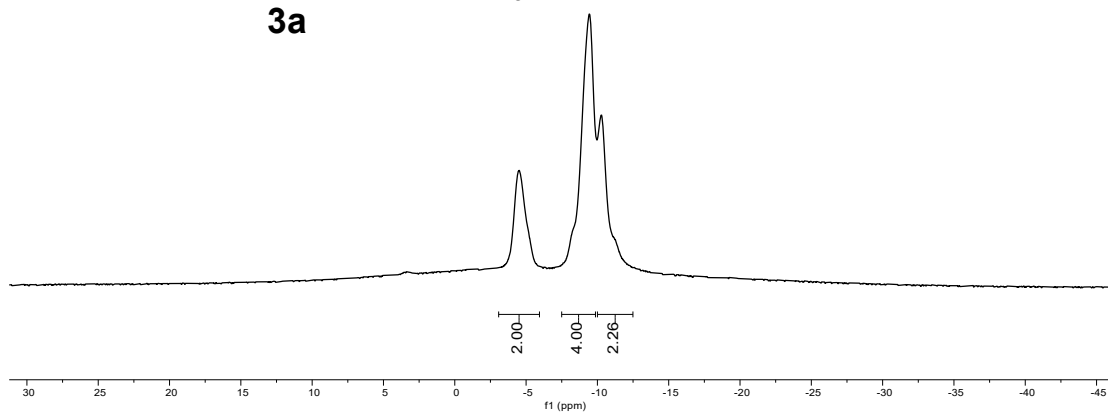

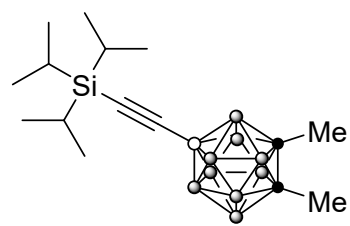

-3.74  
-4.78  
-7.59  
-8.37  
-8.87  
-9.69  
-10.08  
-10.92

$^{11}\text{B}$  NMR (128 MHz,  $\text{CDCl}_3$ )  
**3a**

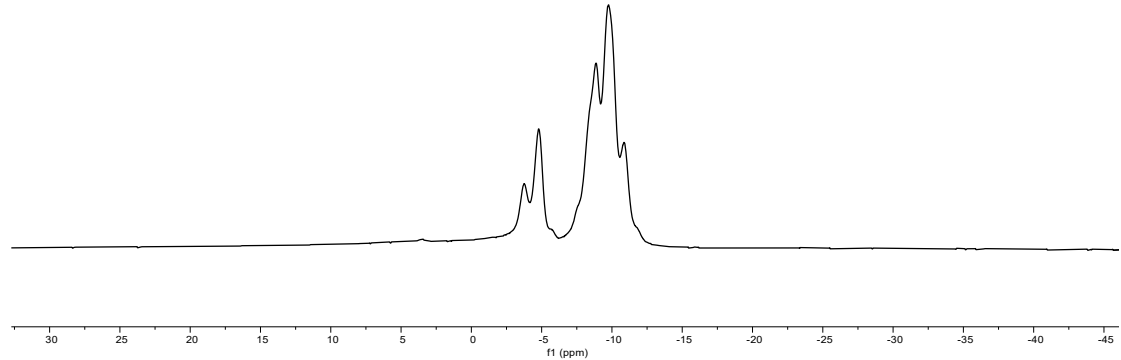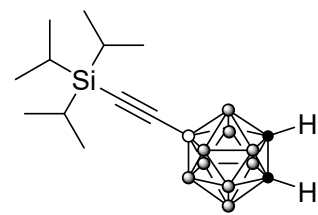

-7.26

3.52  
3.51  
3.51  
3.50  
3.42  
3.41  
3.41  
3.39  
2.36  
2.35  
2.28  
2.08  
1.11  
1.10  
1.08  
1.07  
1.06  
1.05  
1.04  
1.03  
1.02  
1.02  
1.01  
1.01

$^1\text{H}\{^{11}\text{B}\}$  NMR (400 MHz,  $\text{CDCl}_3$ )  
**3b**

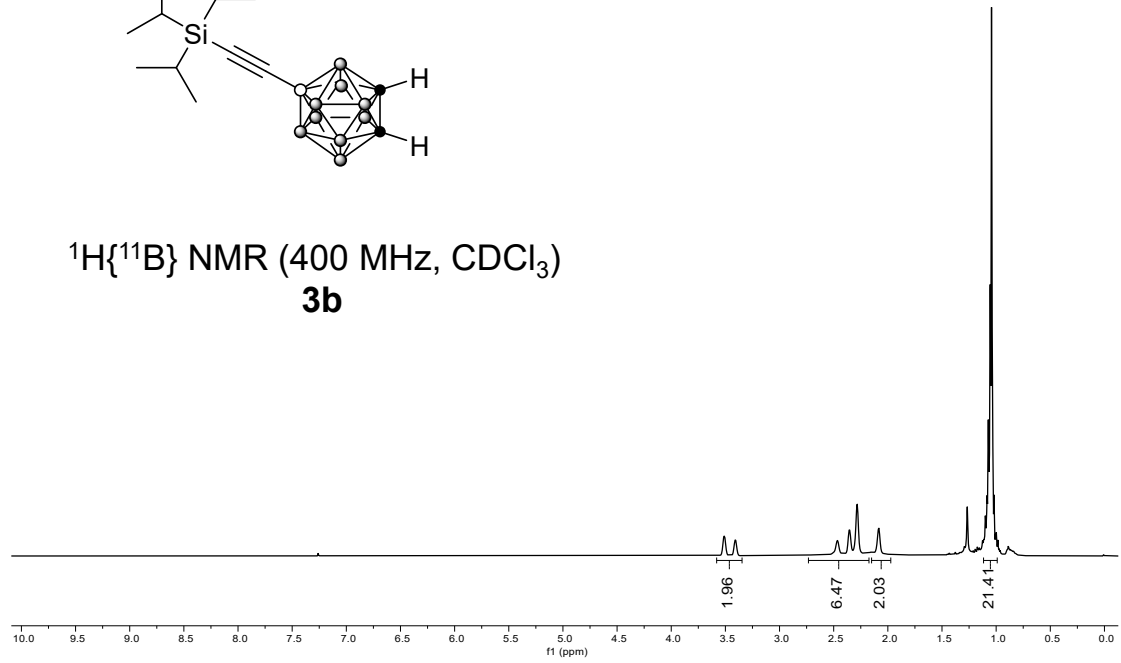

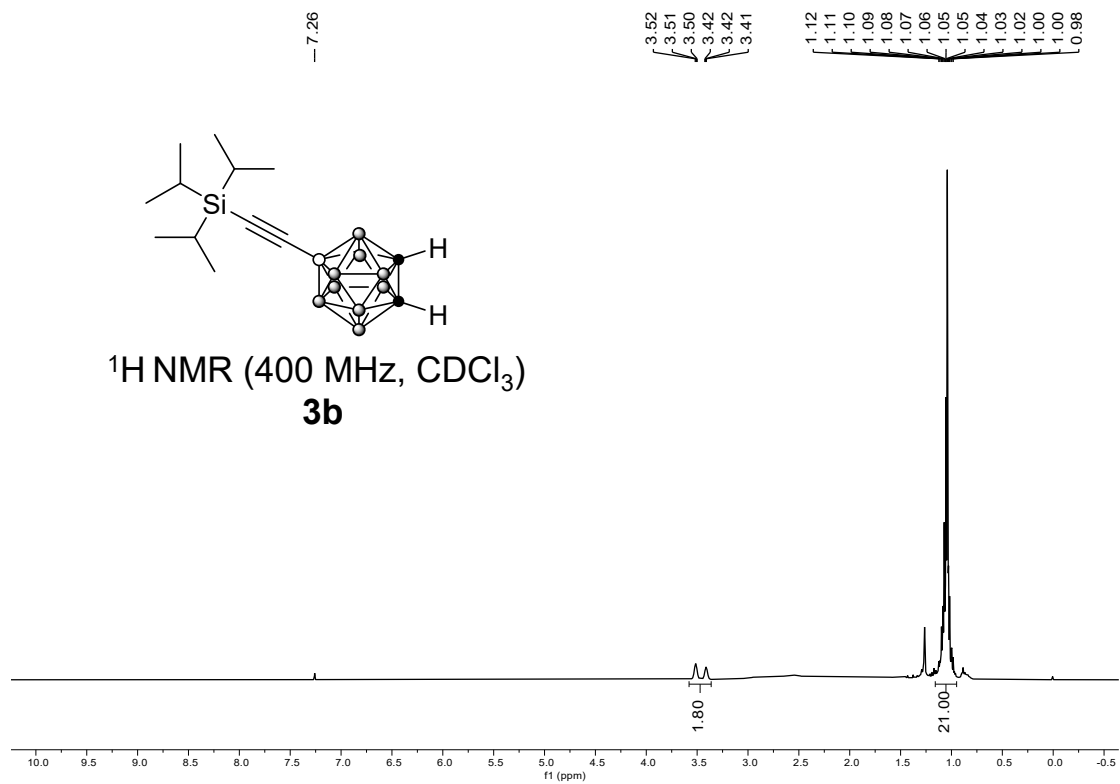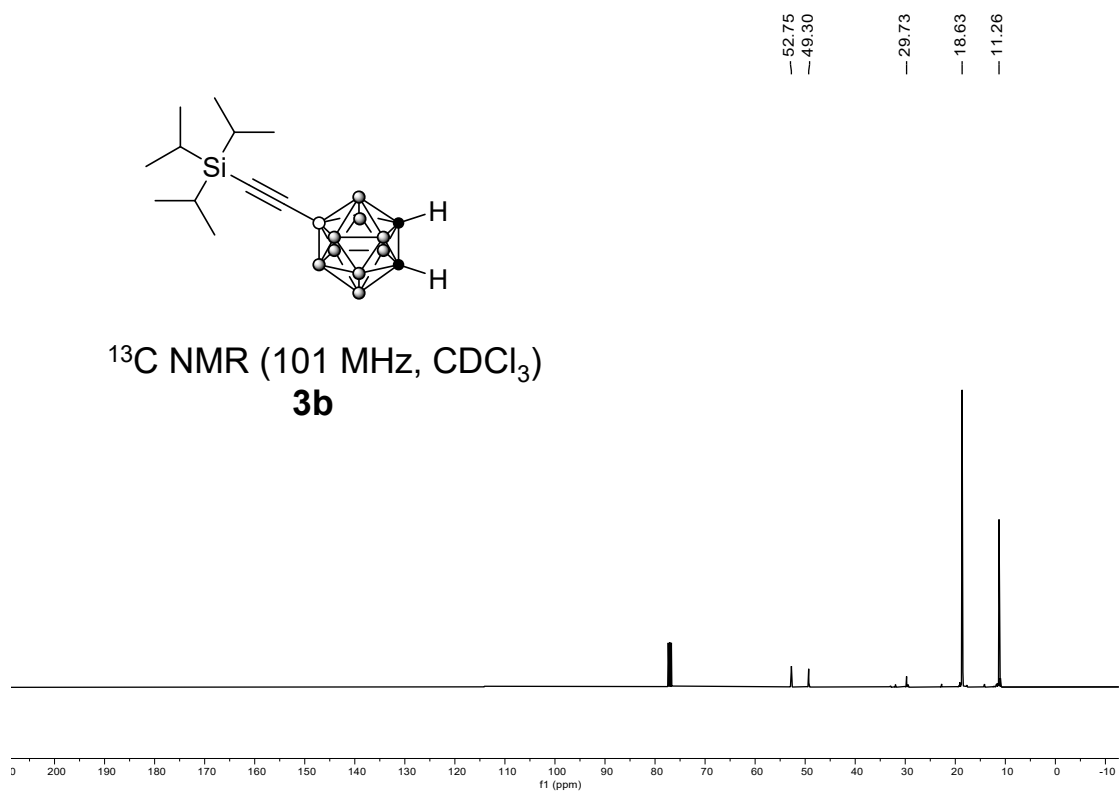

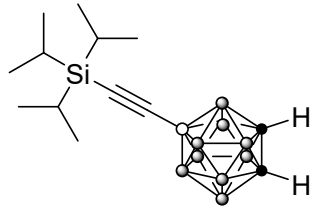

~ -1.71  
~ -2.43  
- -8.41  
~ -13.33  
~ -14.52  
~ -15.61

<sup>11</sup>B{<sup>1</sup>H} NMR (128 MHz, CDCl<sub>3</sub>)  
**3b**

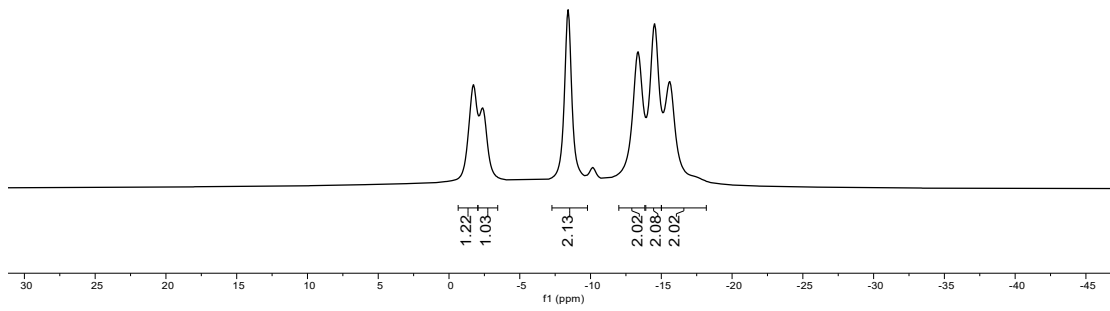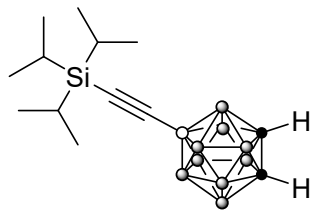

- -1.08  
- -2.35  
- -7.82  
- -9.01  
~ -12.69  
~ -13.94  
~ -15.10  
~ -16.33

<sup>11</sup>B NMR (128 MHz, CDCl<sub>3</sub>)  
**3b**

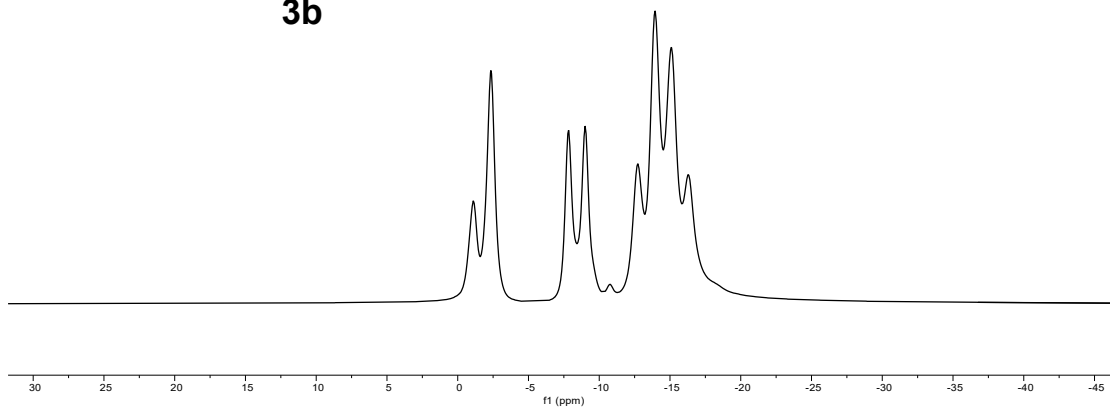

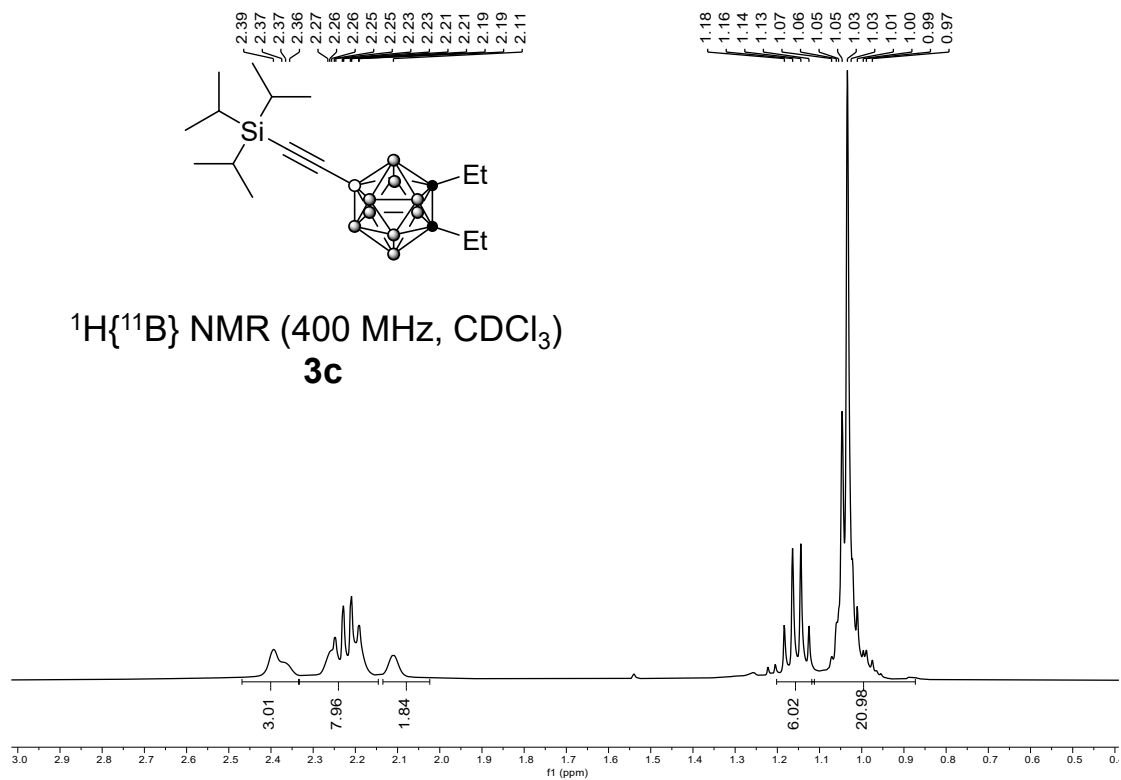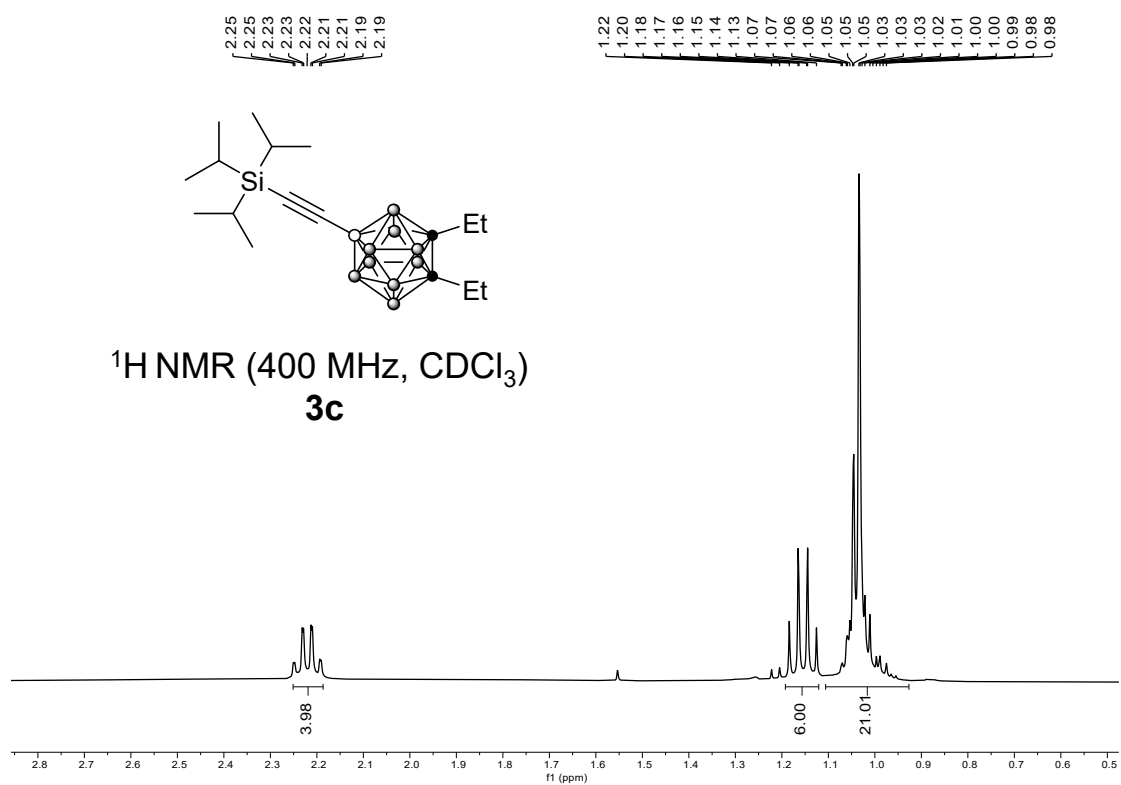

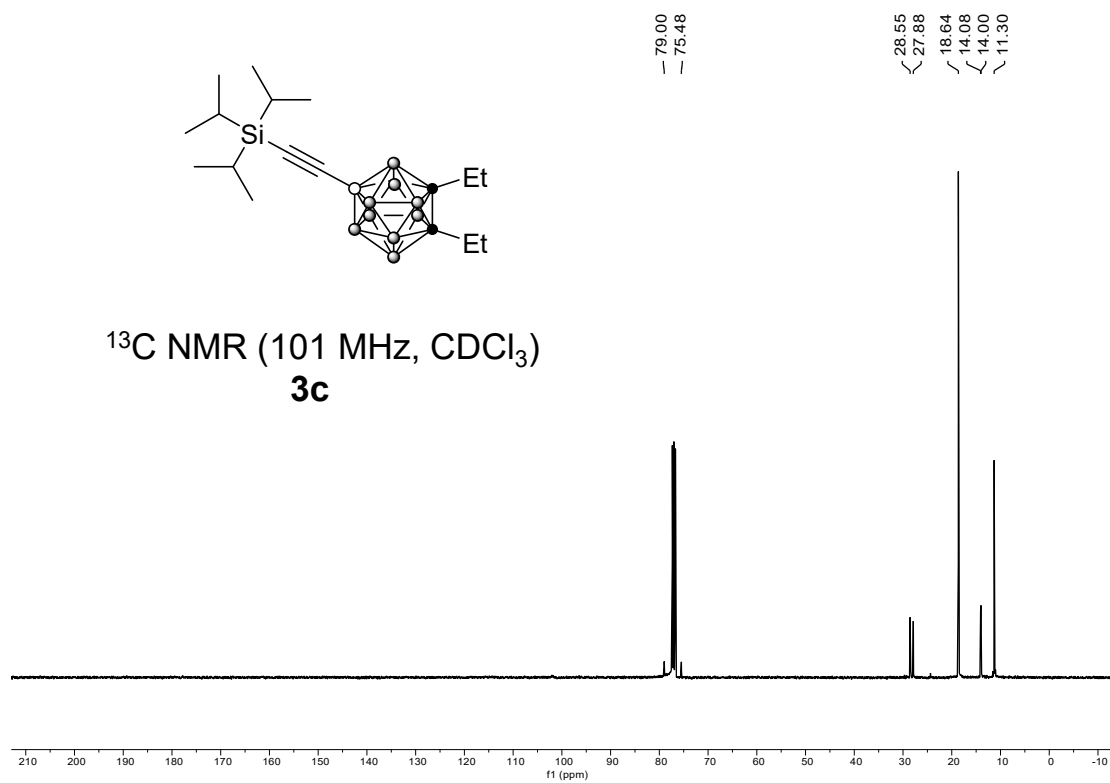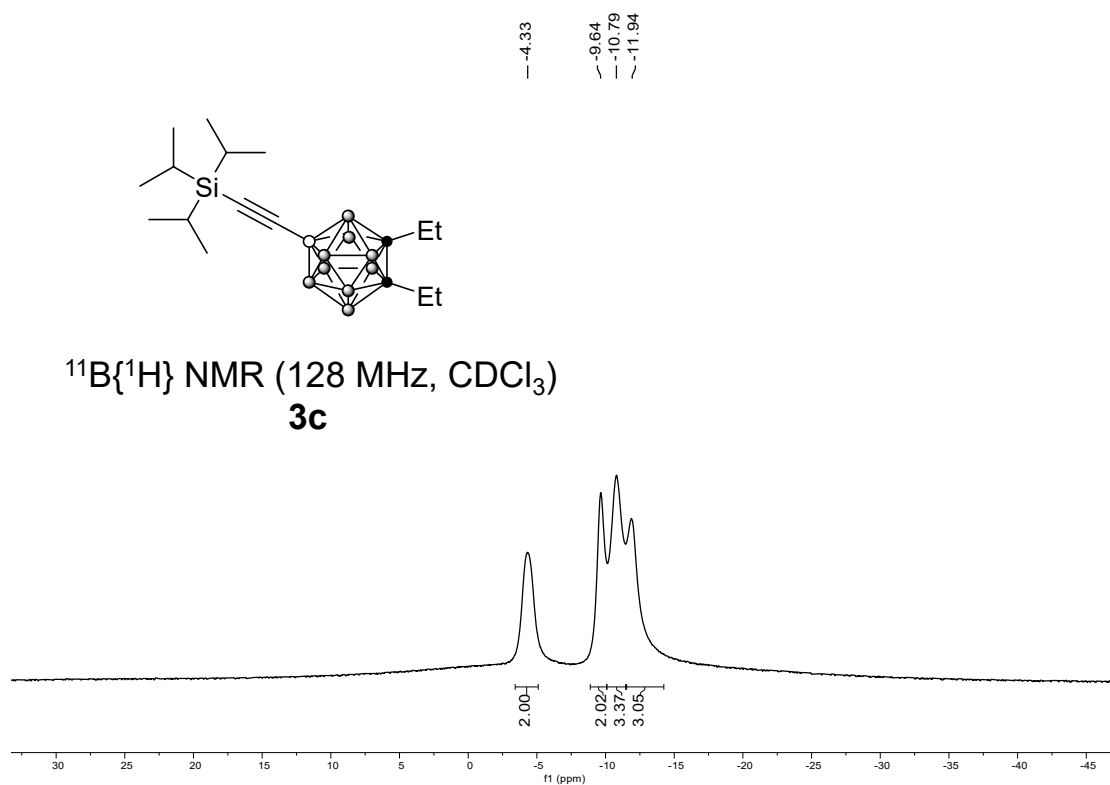



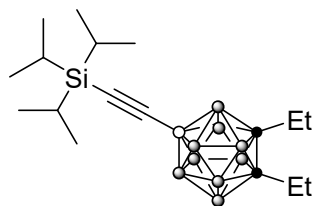

$^{11}\text{B}$  NMR (128 MHz,  $\text{CDCl}_3$ )  
**3c**

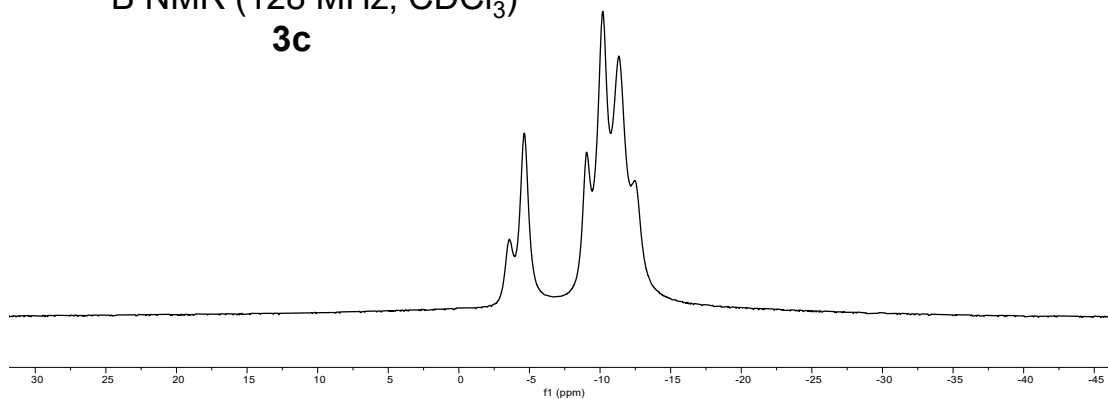

~ -3.55  
~ -4.64  
~ -9.04  
~ -10.17  
~ -11.35  
~ -12.57

7.26  
2.39  
2.36  
2.26  
2.19  
2.14  
2.14  
2.13  
2.12  
2.11  
2.10  
2.09  
1.57  
1.55  
1.54  
1.53  
1.52  
1.51  
1.51  
1.50  
1.49  
1.48  
1.47  
1.46  
1.36  
1.35  
1.34  
1.33  
1.32  
1.31  
1.30  
1.29  
1.06  
1.05  
1.04  
1.02  
1.01  
1.00  
0.99  
0.95  
0.94  
0.93  
0.92  
0.91  
0.90

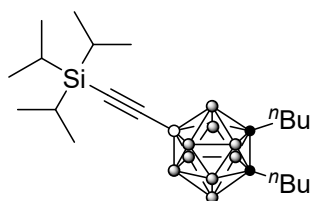

$^1\text{H}\{^{11}\text{B}\}$  NMR (400 MHz,  $\text{CDCl}_3$ )  
**3d**

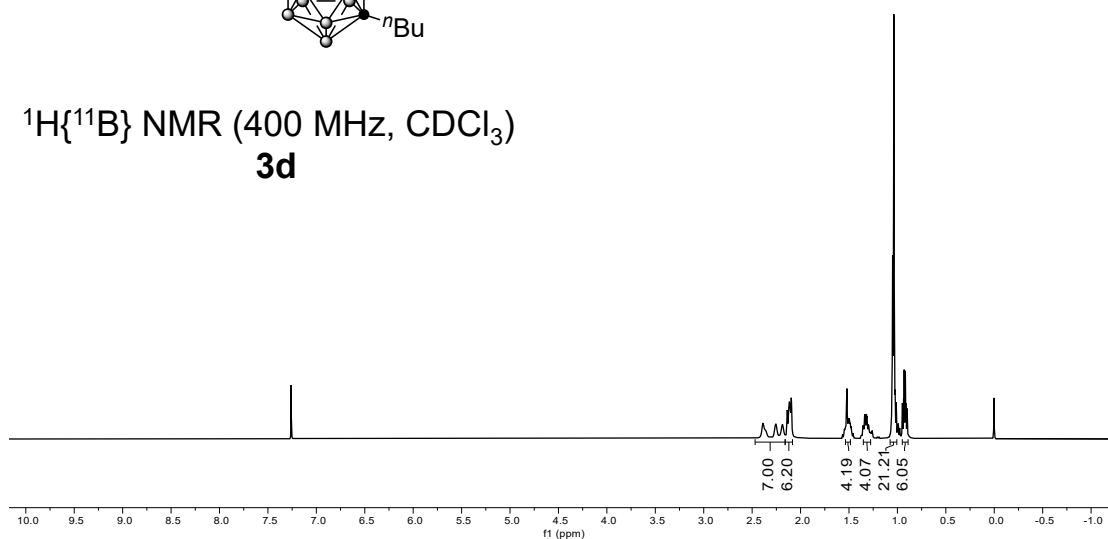

7.00  
6.20

4.19  
4.07

21.21  
6.05

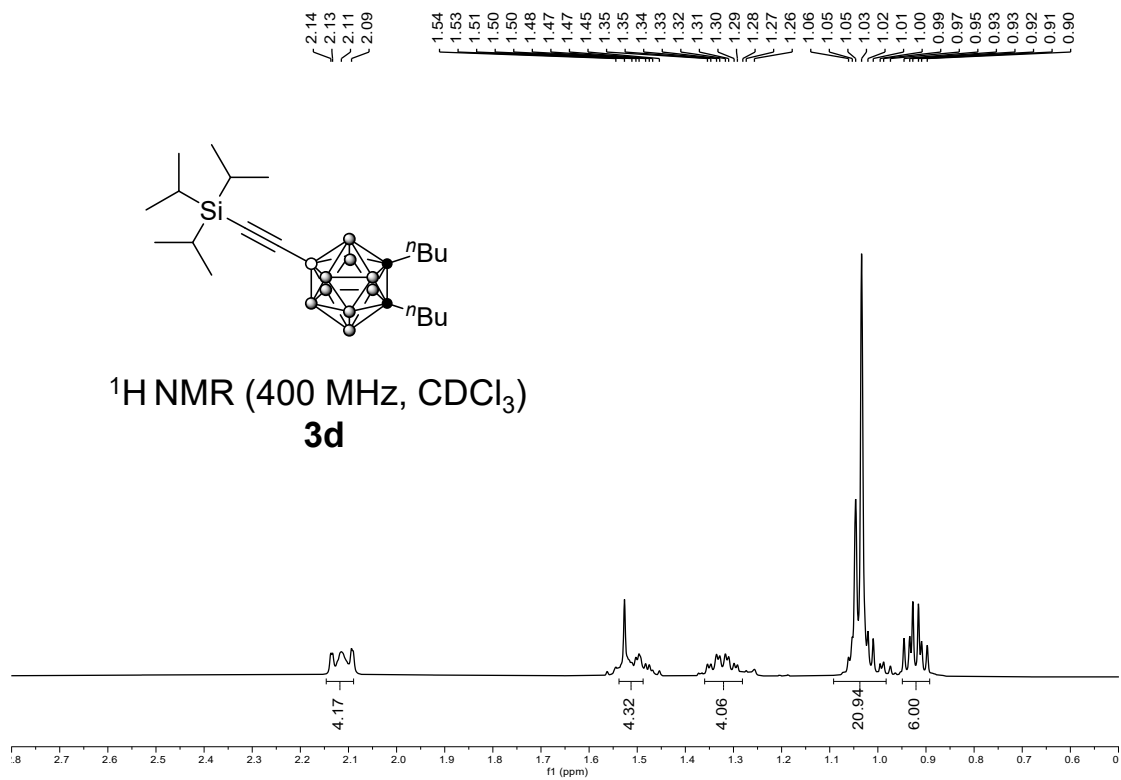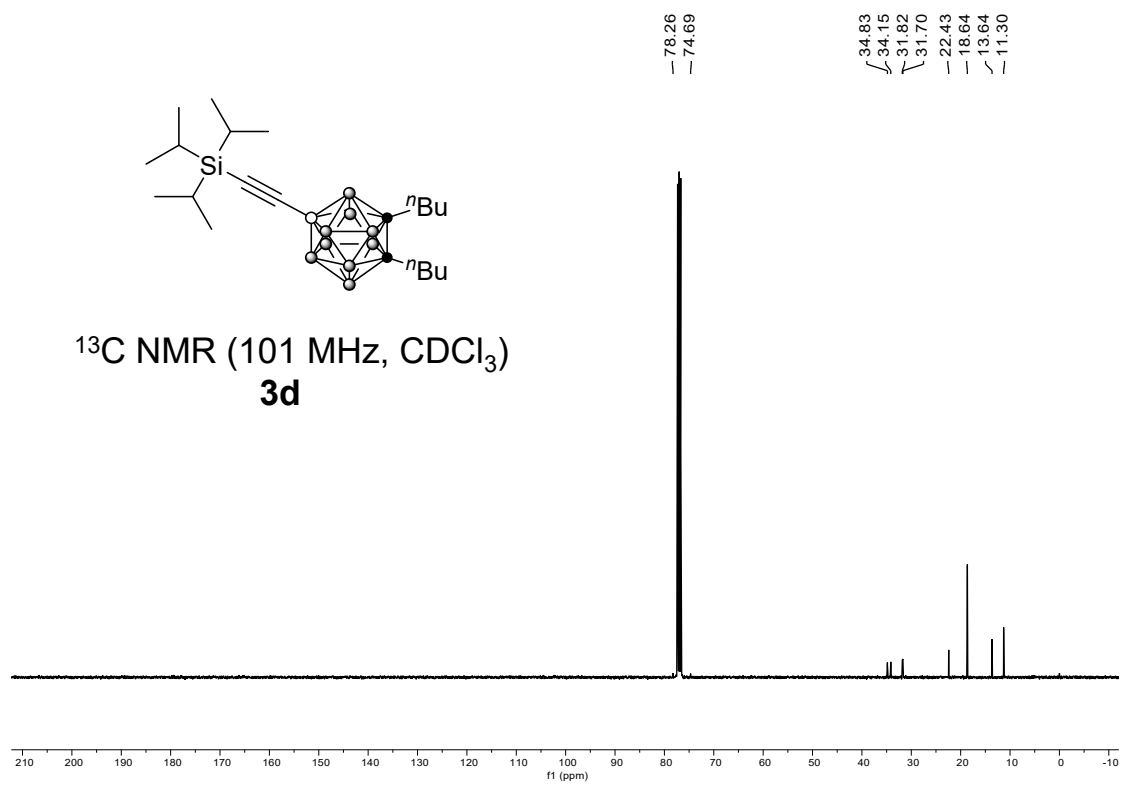

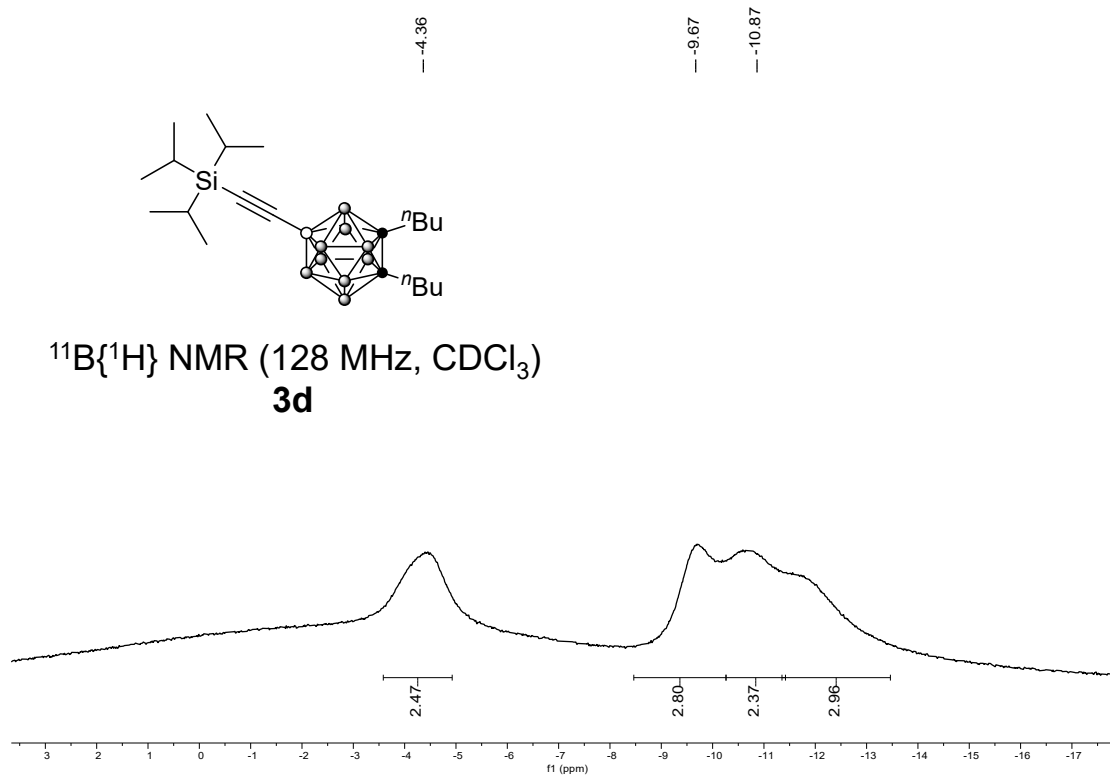

$^{11}\text{B}\{^1\text{H}\}$  NMR (128 MHz,  $\text{CDCl}_3$ )  
**3d**

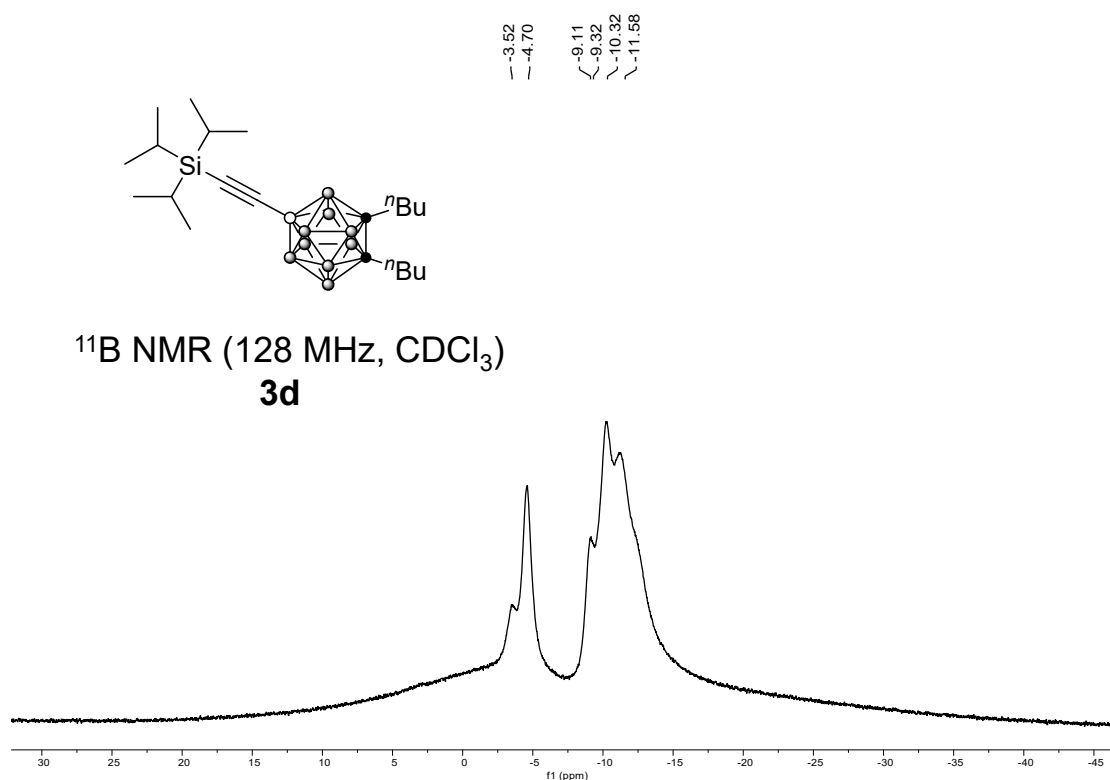

$^{11}\text{B}$  NMR (128 MHz,  $\text{CDCl}_3$ )  
**3d**

- 7.26

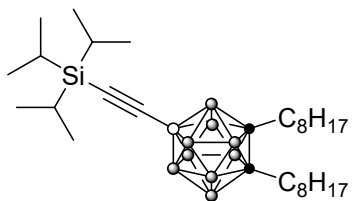

$^1\text{H}\{^{11}\text{B}\}$  NMR (400 MHz,  $\text{CDCl}_3$ )

**3e**

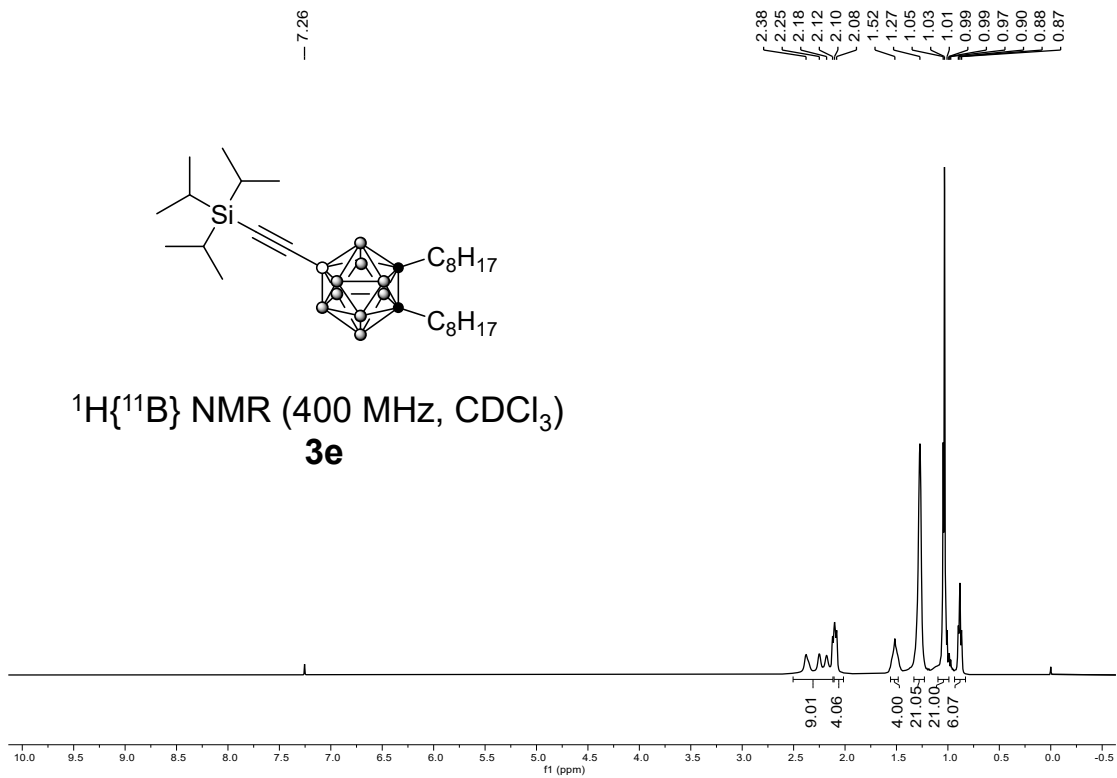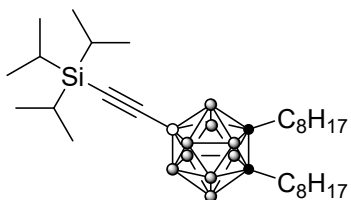

$^1\text{H}$  NMR (400 MHz,  $\text{CDCl}_3$ )

**3e**

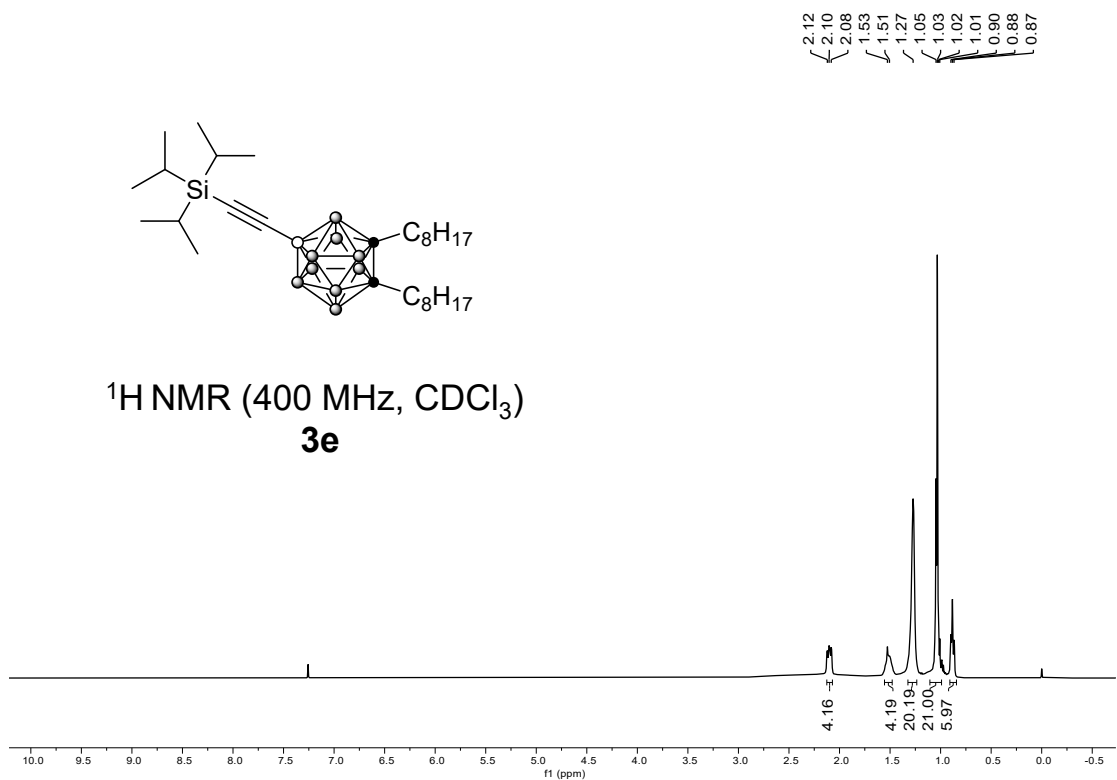



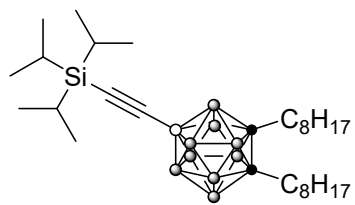

$^{11}\text{B}$  NMR (128 MHz,  $\text{CDCl}_3$ )  
**3e**

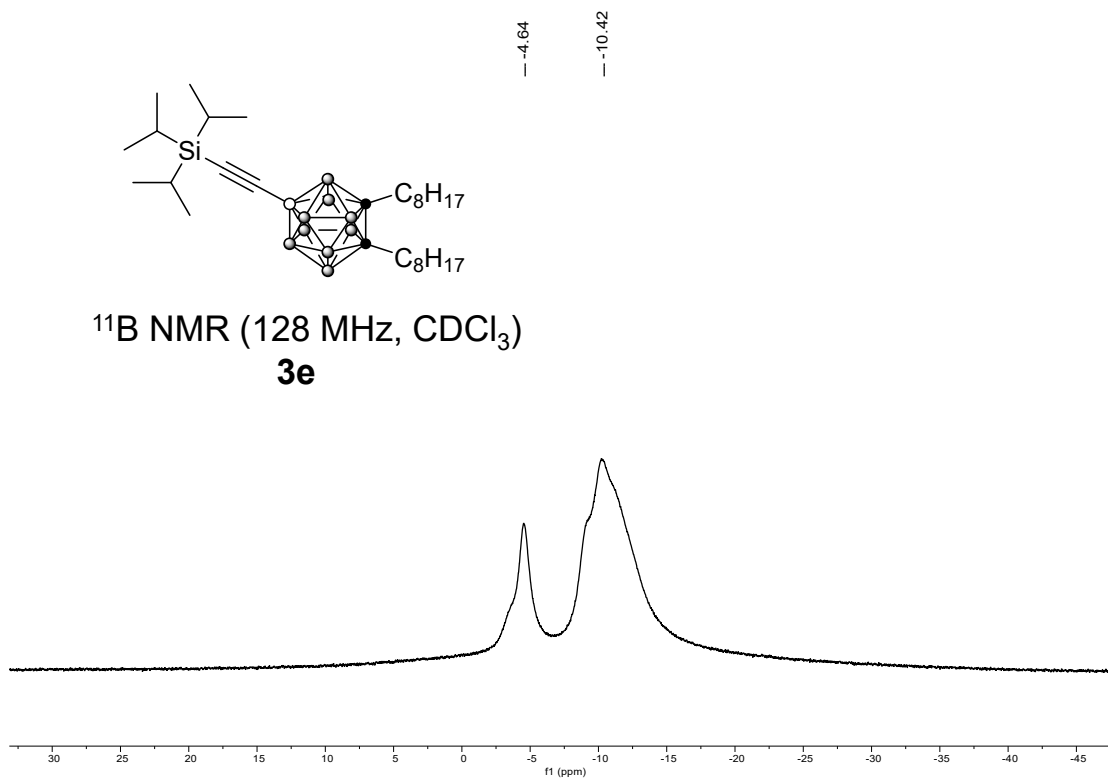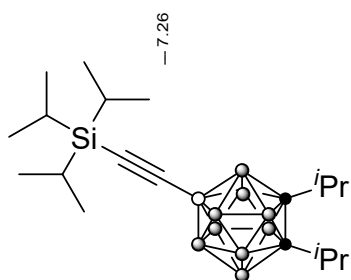

$^1\text{H}\{^{11}\text{B}\}$  NMR (400 MHz,  $\text{CDCl}_3$ )  
**3f**

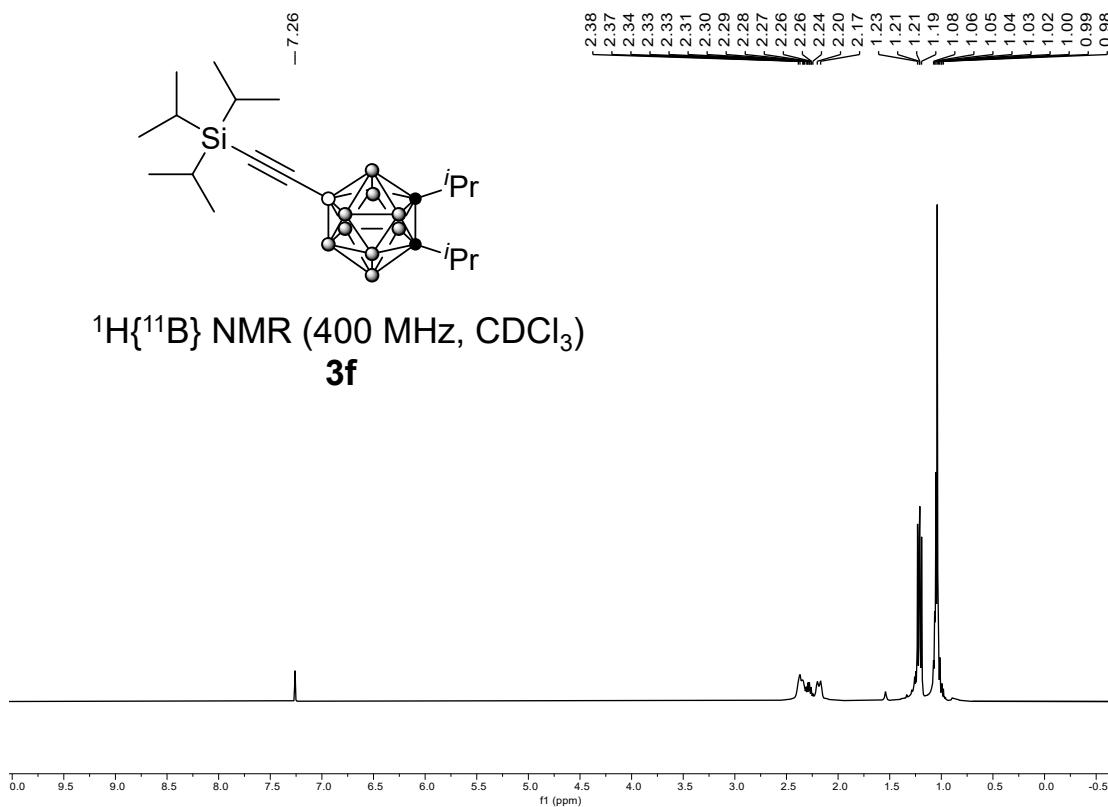

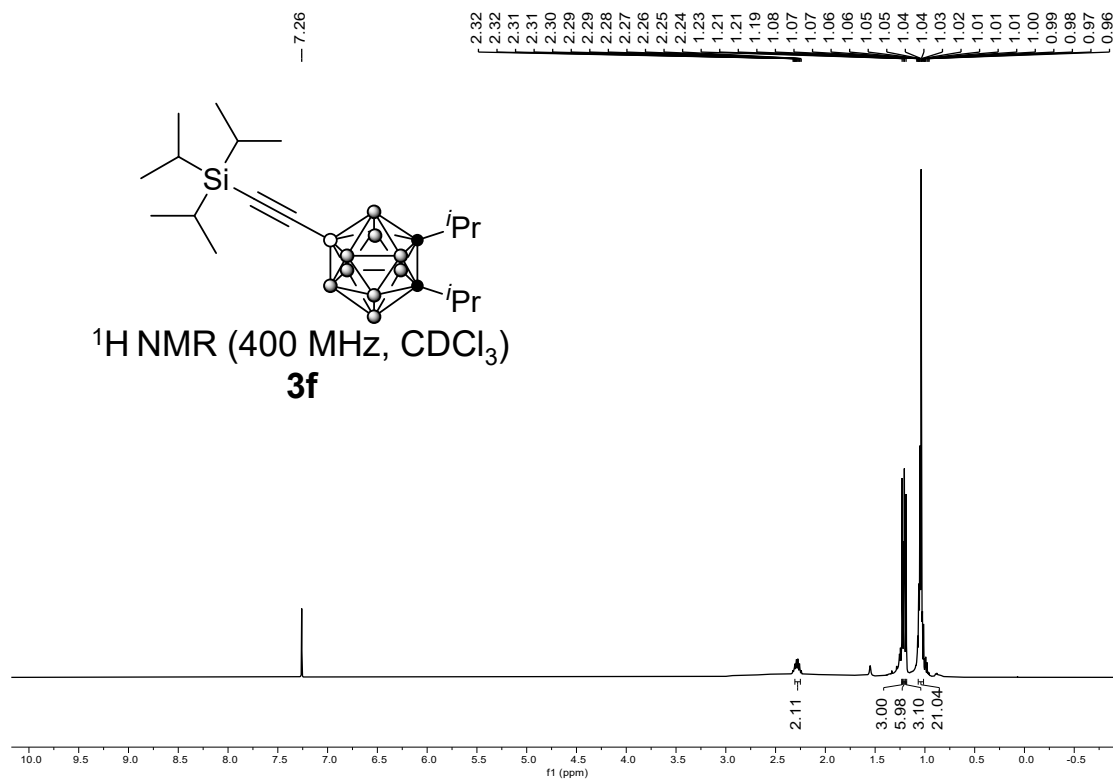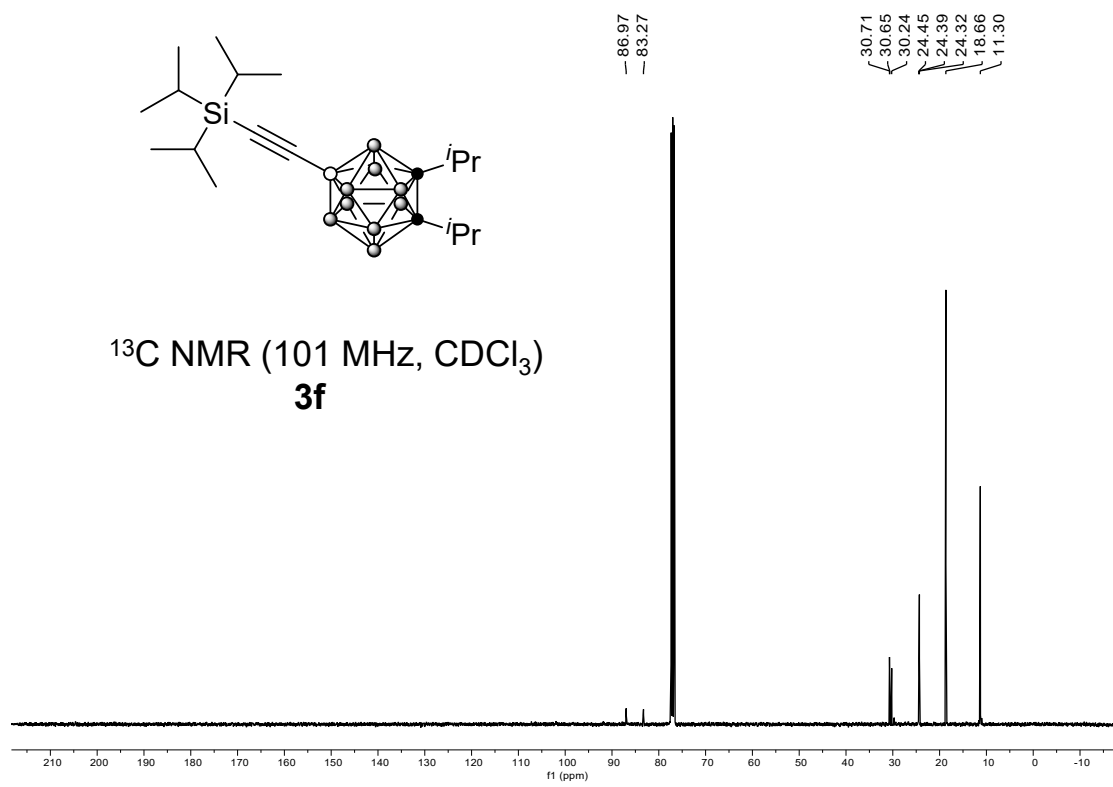

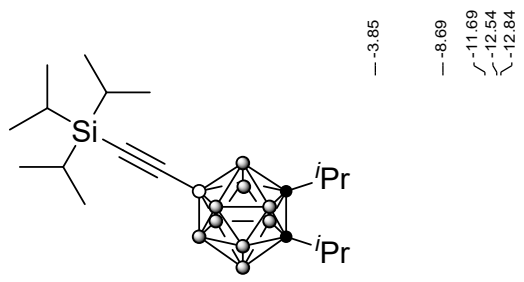

$^{11}\text{B}\{^1\text{H}\}$  NMR (128 MHz,  $\text{CDCl}_3$ )  
**3f**

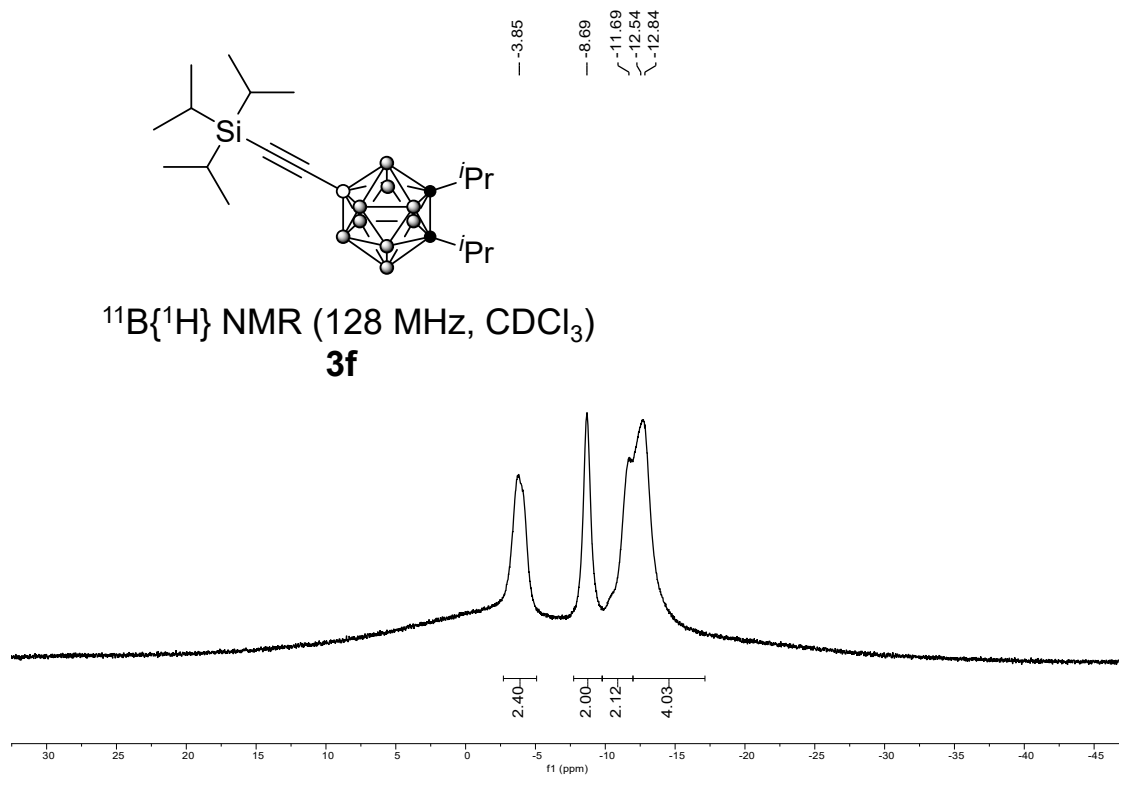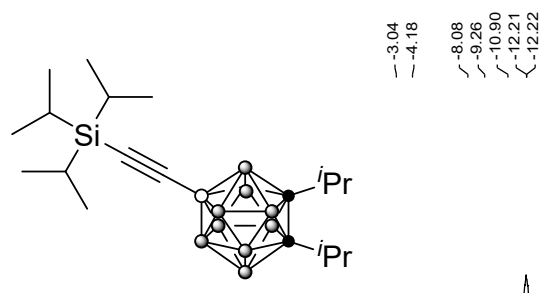

$^{11}\text{B}$  NMR (128 MHz,  $\text{CDCl}_3$ )  
**3f**

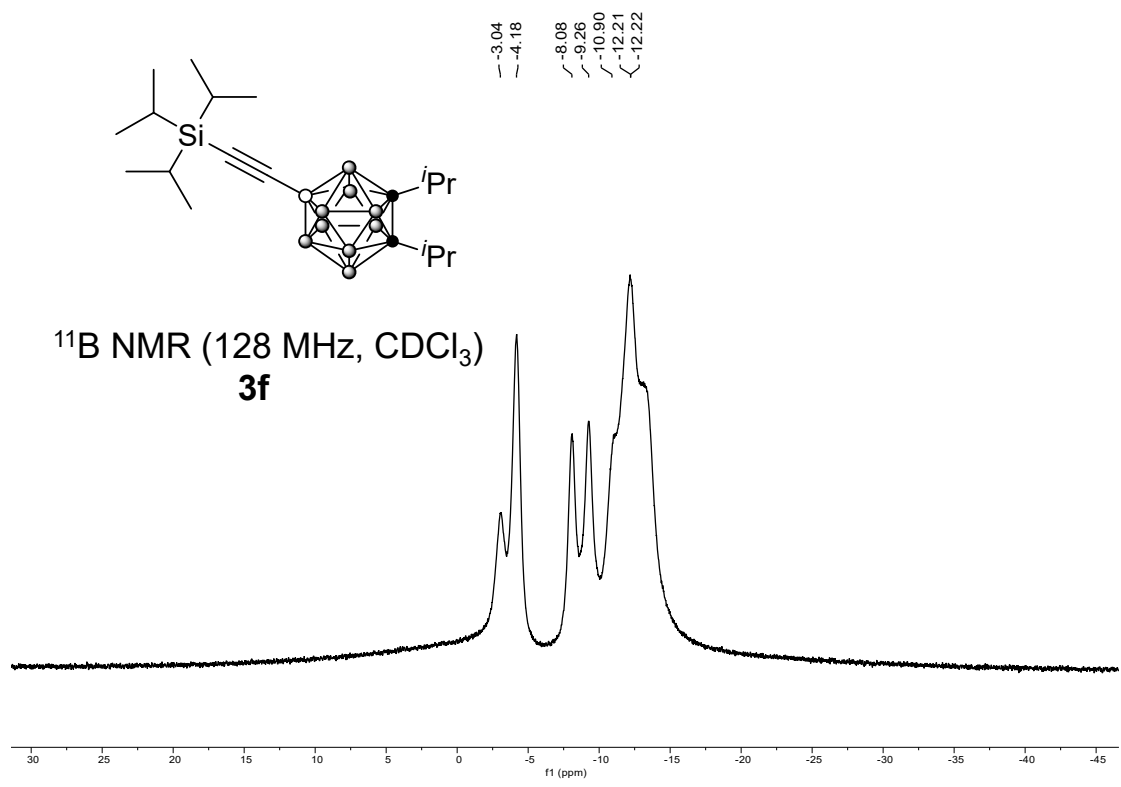



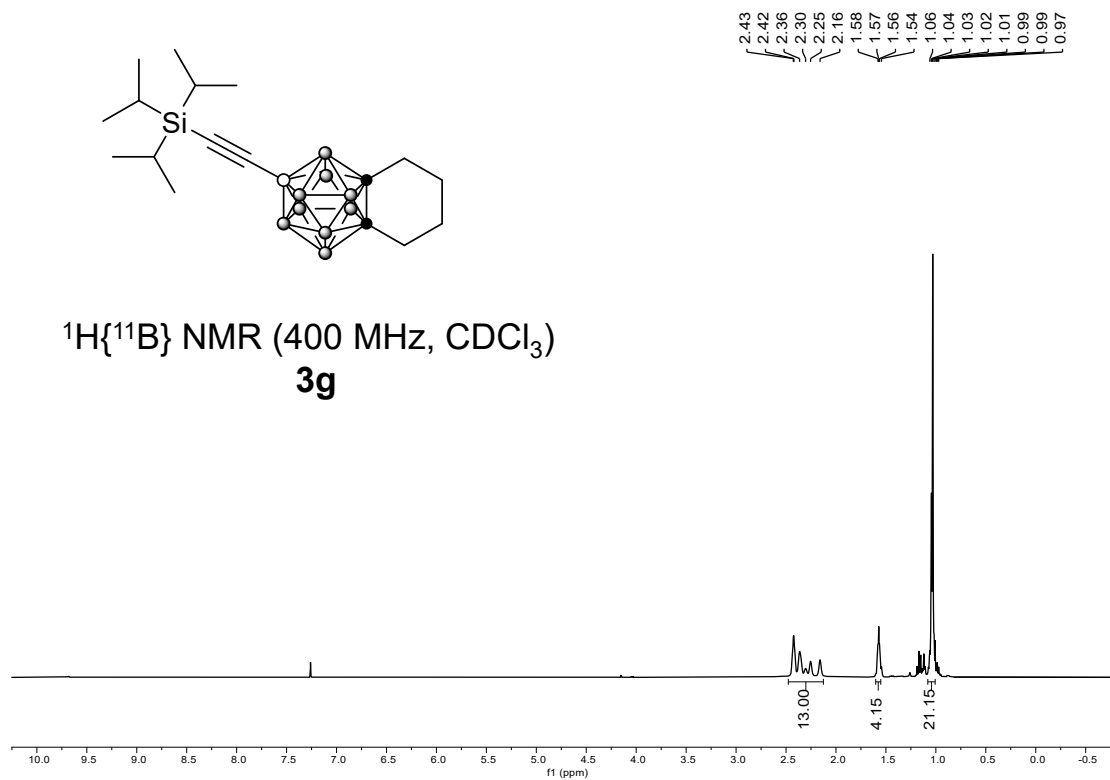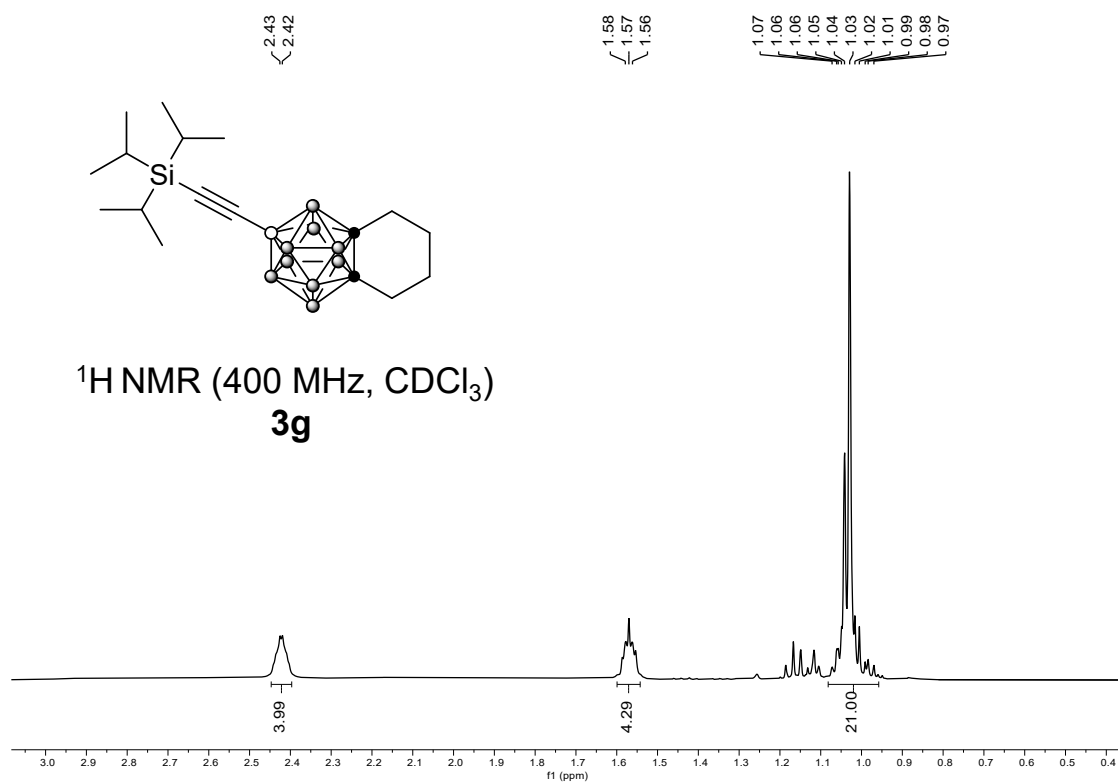

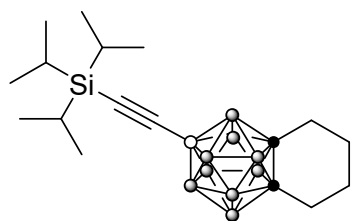

71.48  
68.10  
32.75  
32.19  
19.74  
19.55  
18.64  
18.46  
11.28

$^{13}\text{C}$  NMR (101 MHz,  $\text{CDCl}_3$ )  
**3g**

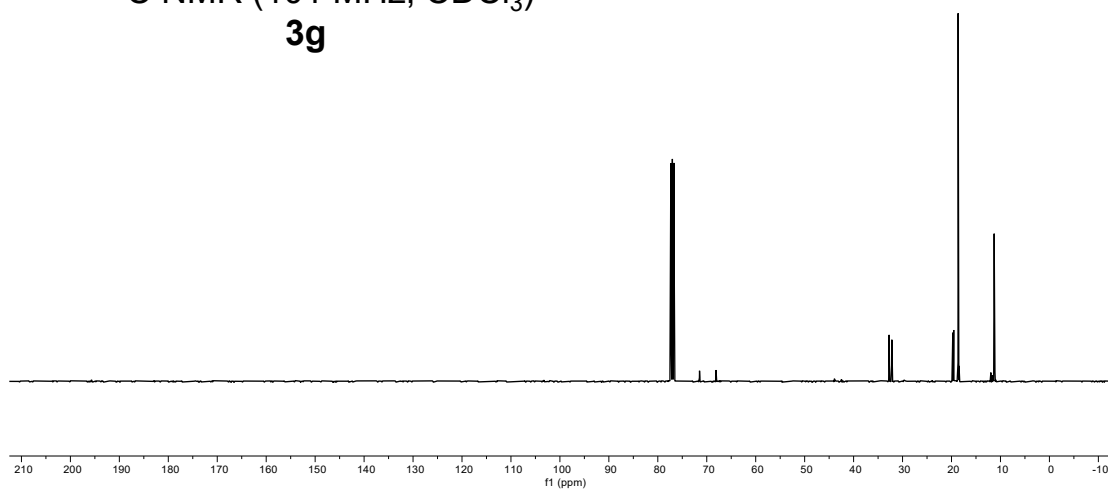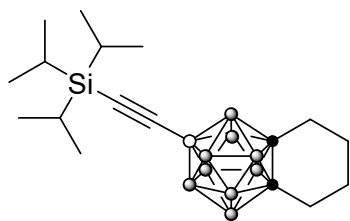

-5.12  
-8.39  
-9.33  
-10.45  
-12.48

$^{11}\text{B}\{^1\text{H}\}$  NMR (128 MHz,  $\text{CDCl}_3$ )  
**3g**

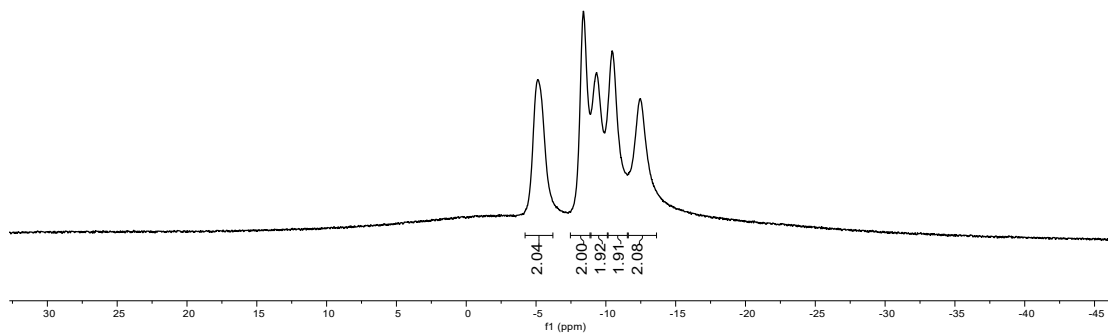

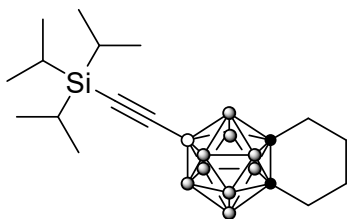

~-4.41  
 ~-5.48  
 ~-7.81  
 ~-8.94  
 ~-9.88  
 ~-11.13  
 ~-13.13

$^{11}\text{B}$  NMR (128 MHz,  $\text{CDCl}_3$ )  
**3g**

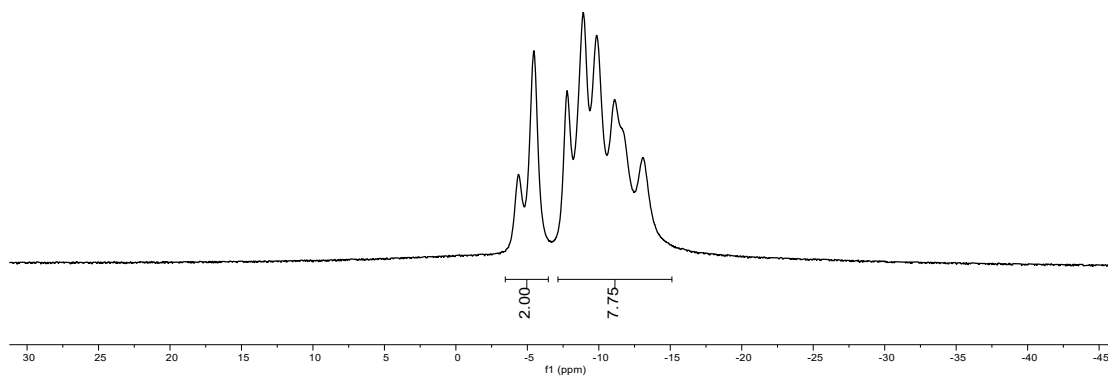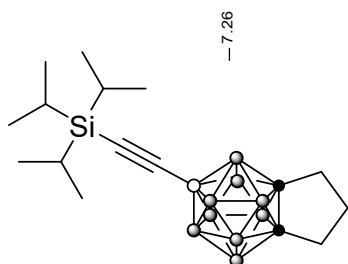

~ 7.26

2.51  
 2.50  
 2.48  
 2.47  
 2.45  
 2.44  
 2.43  
 2.42  
 2.41  
 2.40  
 2.30  
 2.23  
 2.12  
 1.07  
 1.06  
 1.04  
 1.03  
 1.02  
 1.01  
 0.99  
 0.99  
 0.97

$^1\text{H}\{^{11}\text{B}\}$  NMR (400 MHz,  $\text{CDCl}_3$ )  
**3h**

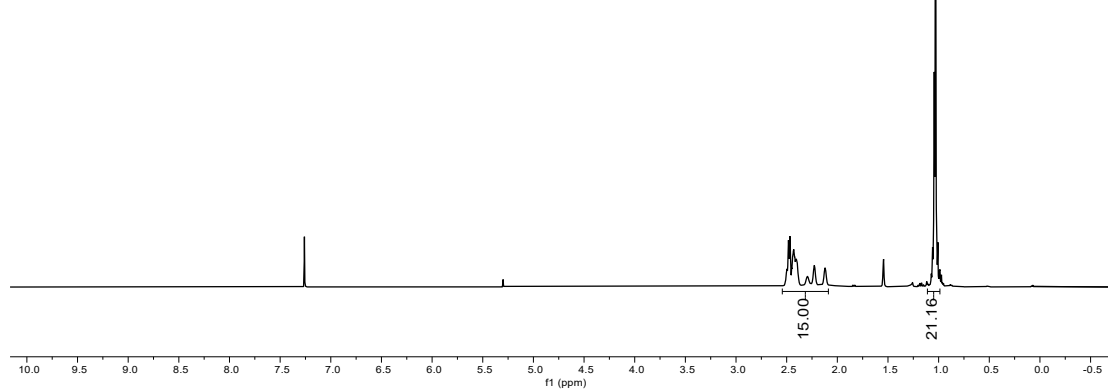

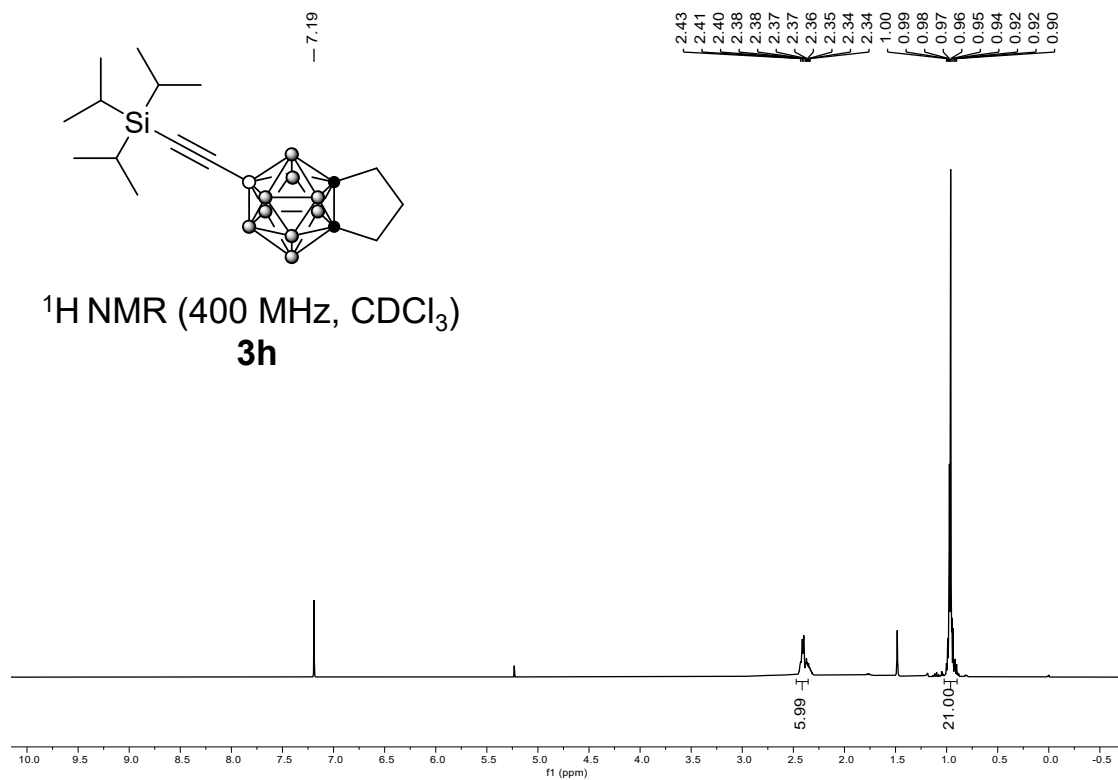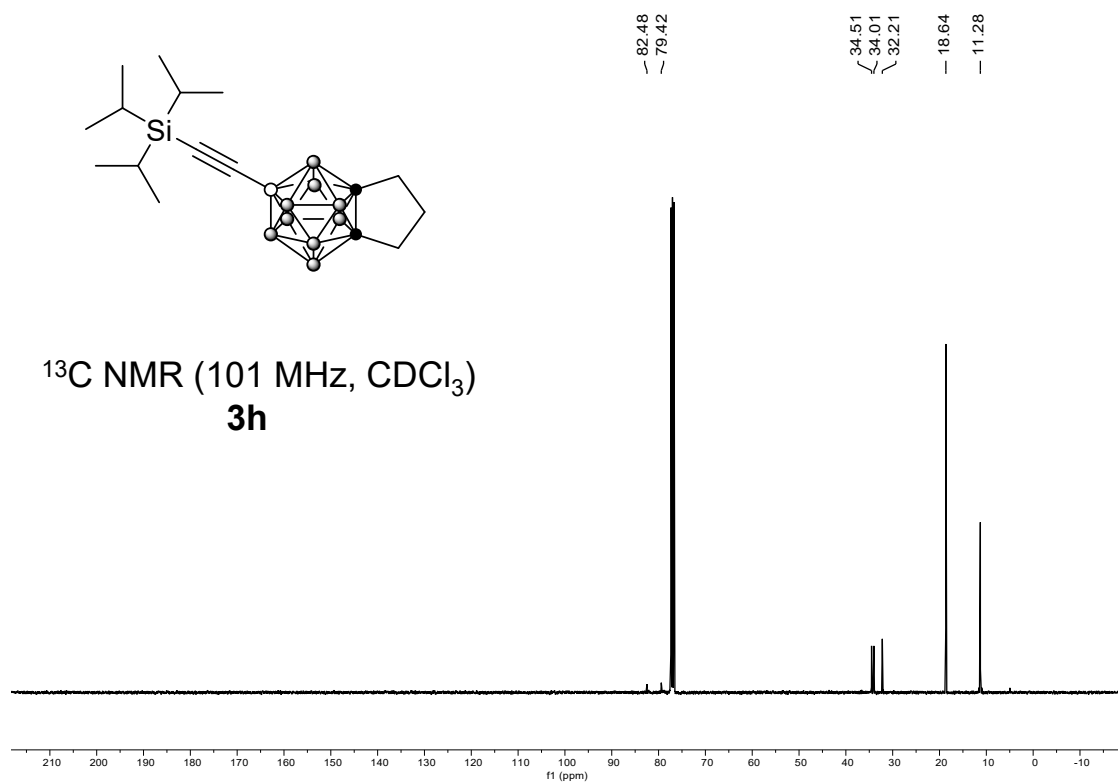

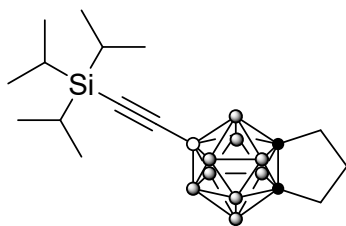

-5.97  
 -7.24  
 -9.91  
 -11.41  
 -12.56

$^{11}\text{B}\{^1\text{H}\}$  NMR (128 MHz,  $\text{CDCl}_3$ )  
**3h**

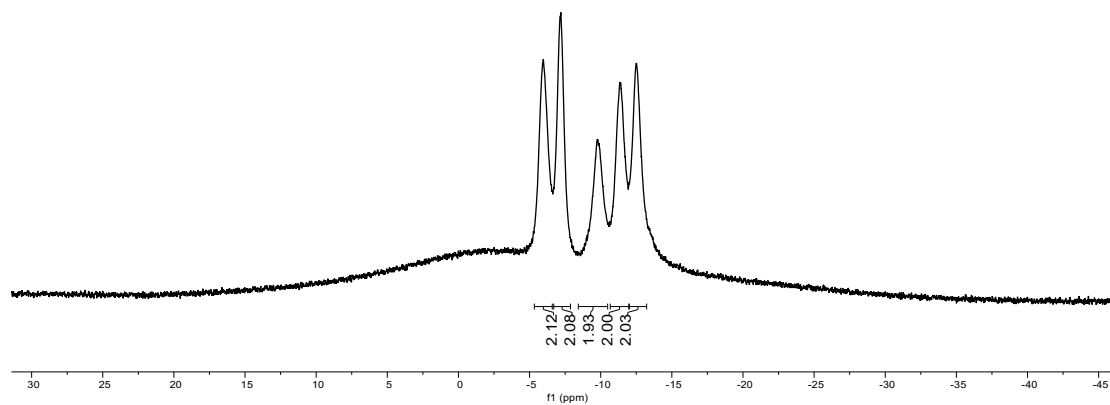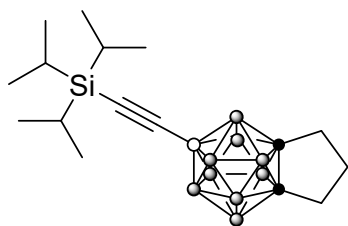

-5.25  
 -6.43  
 -7.76  
 -9.09  
 -10.65  
 -11.92  
 -13.11

$^{11}\text{B}$  NMR (128 MHz,  $\text{CDCl}_3$ )  
**3h**

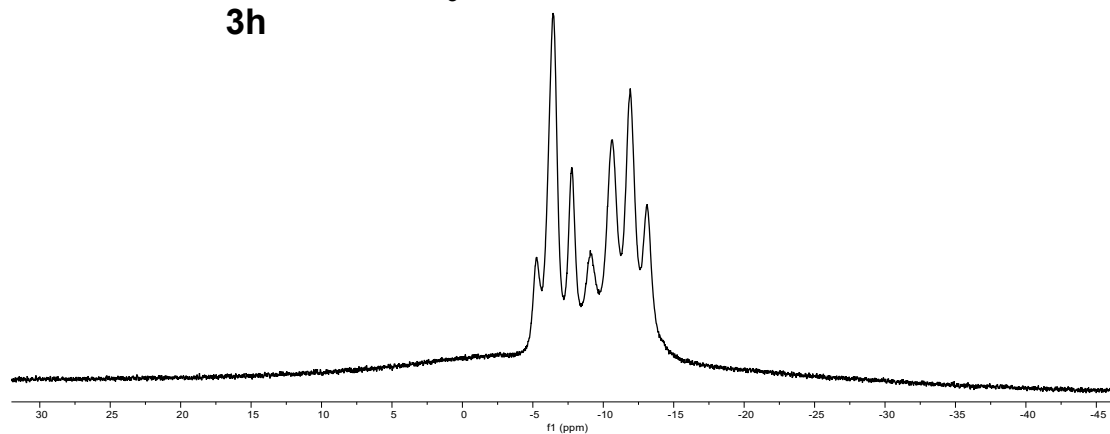

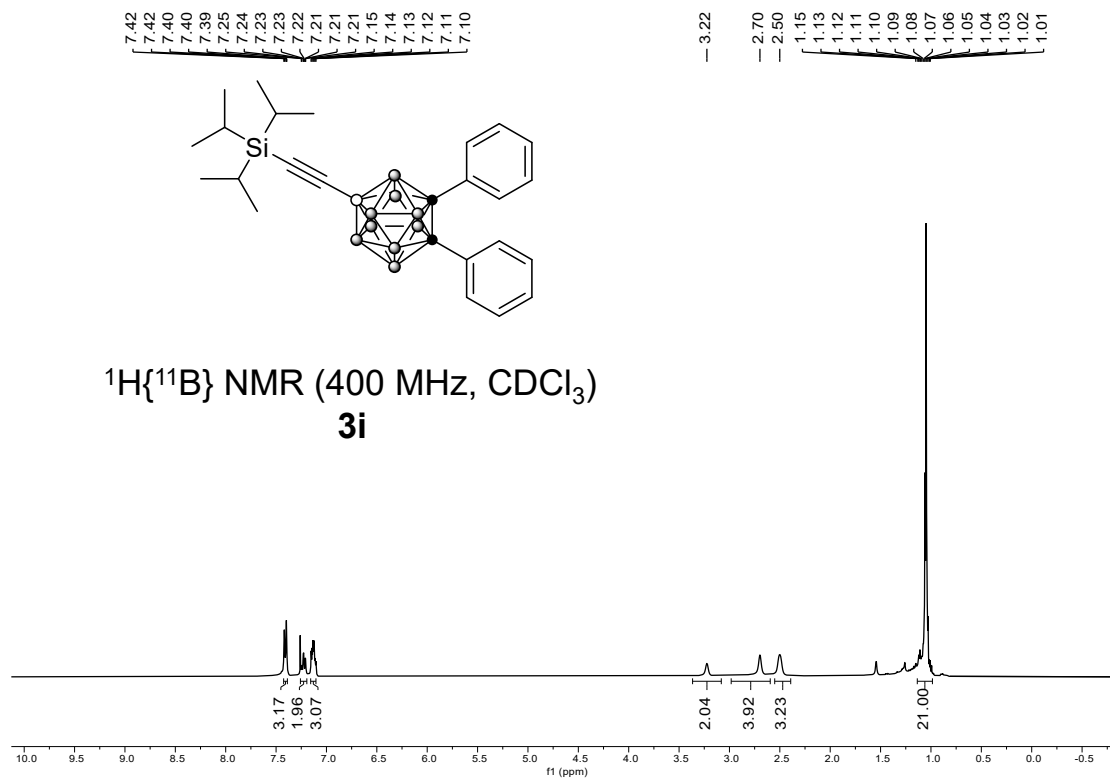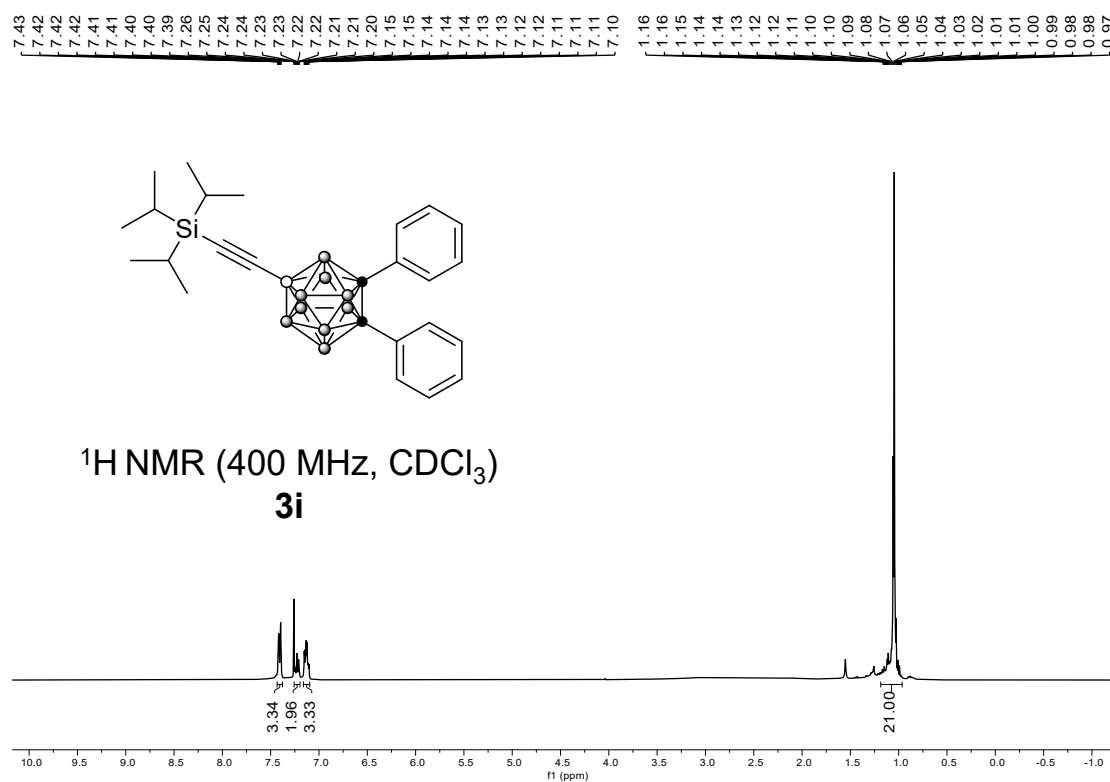

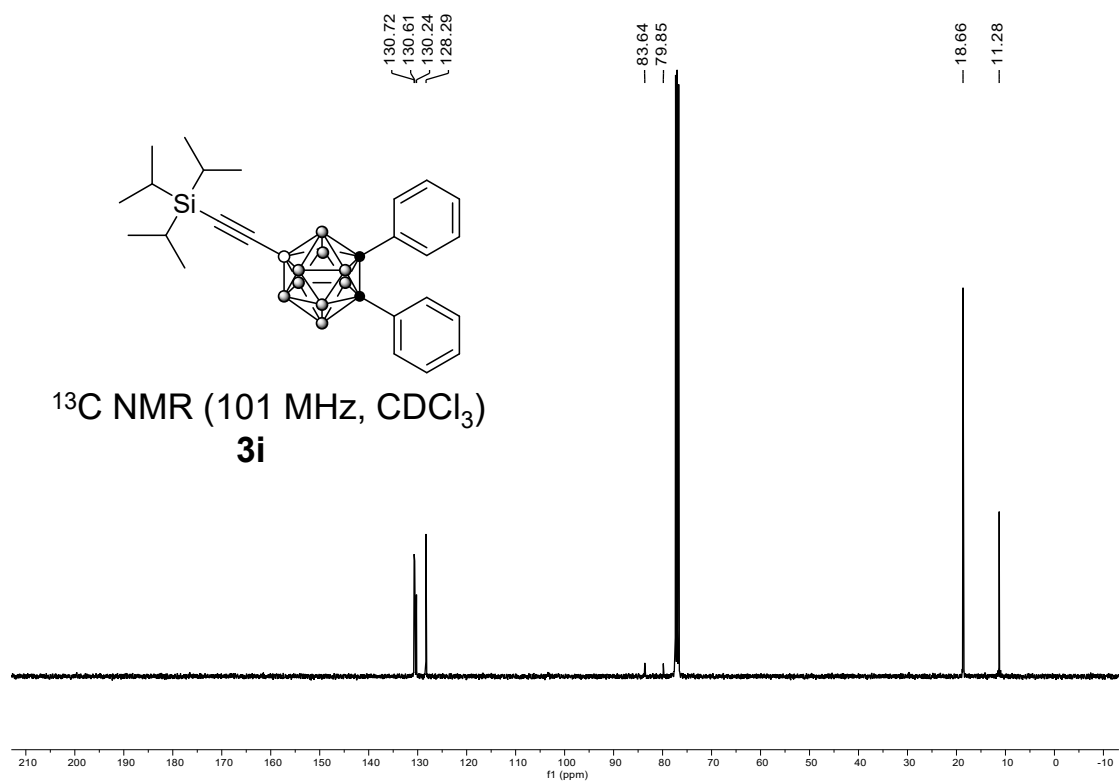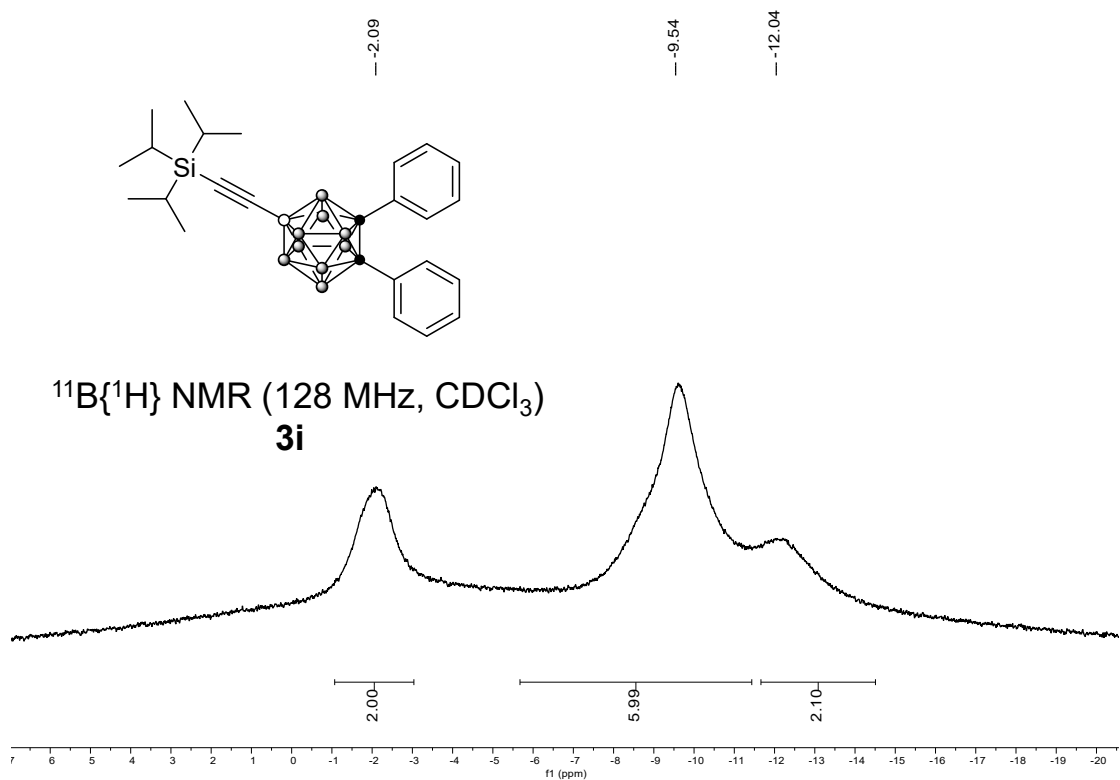

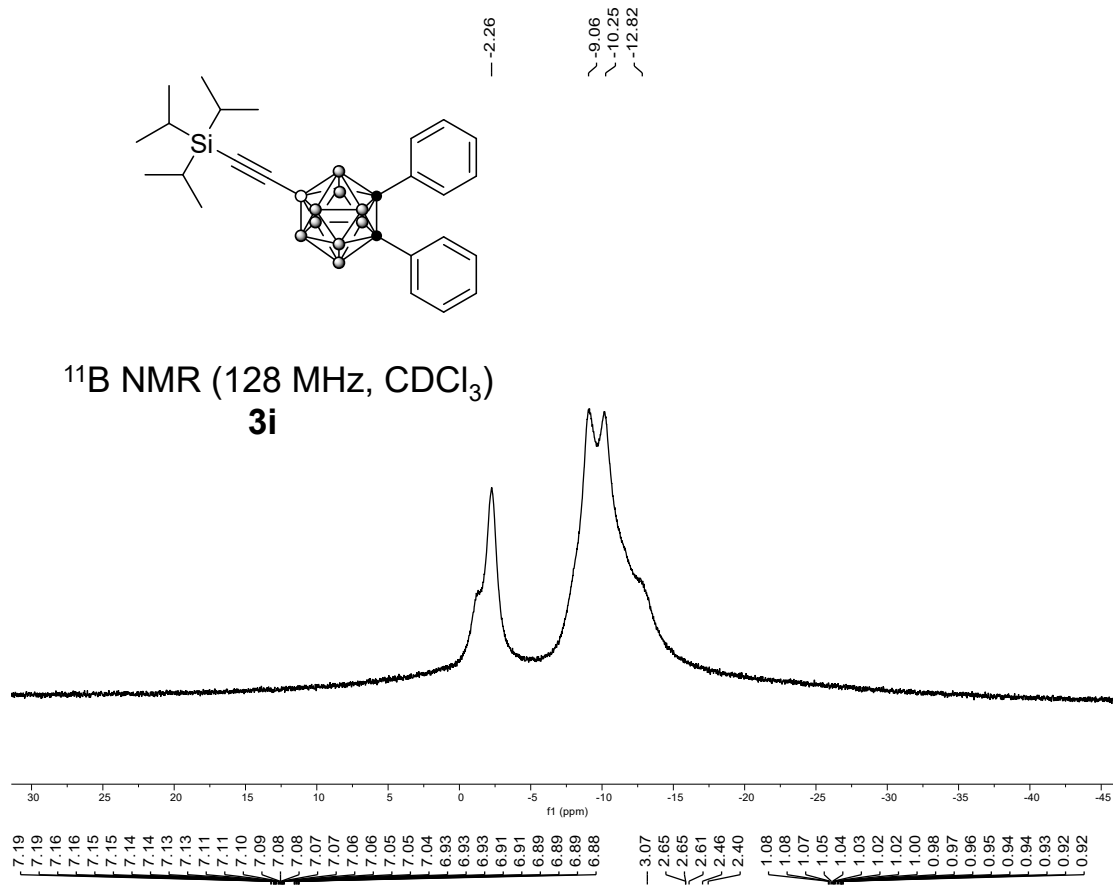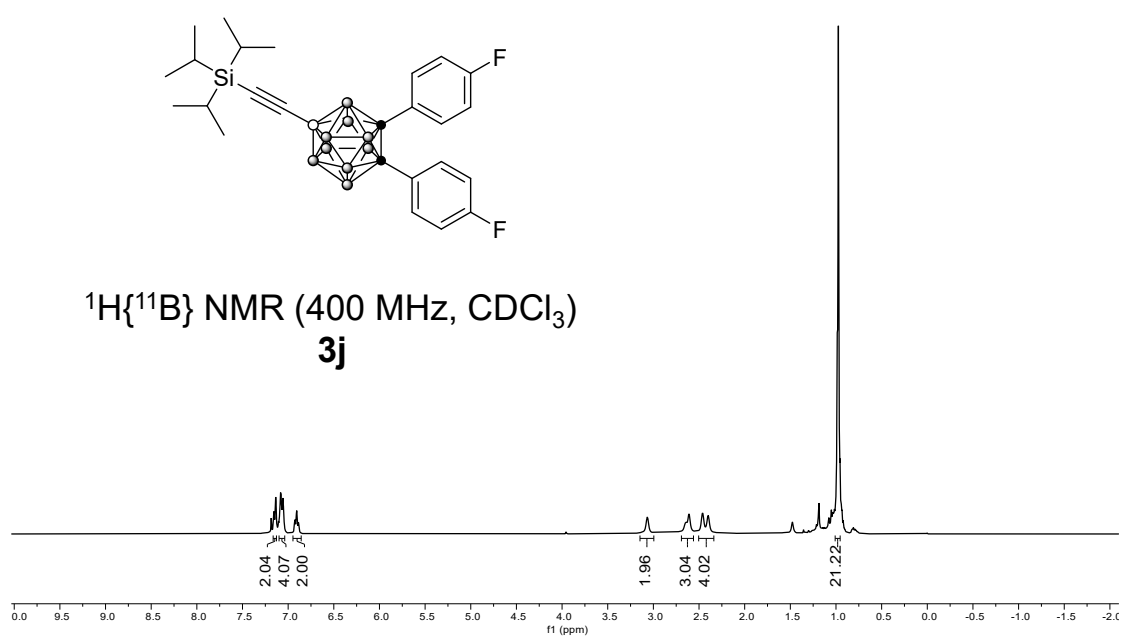



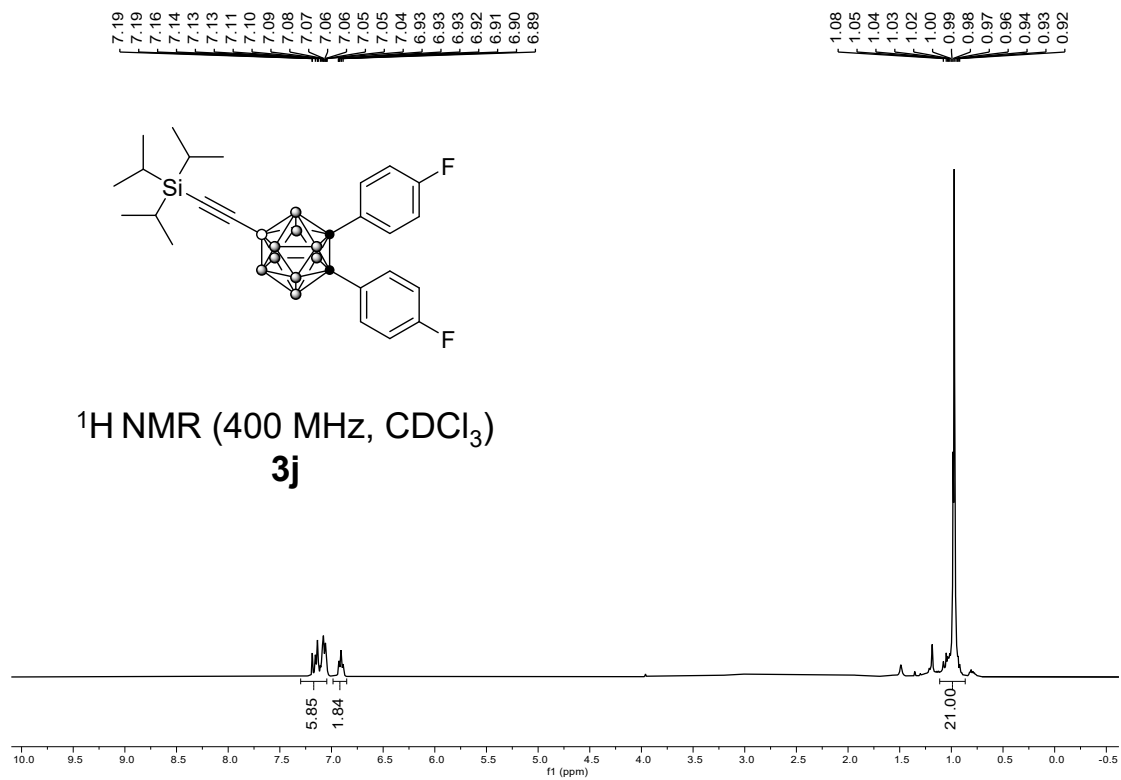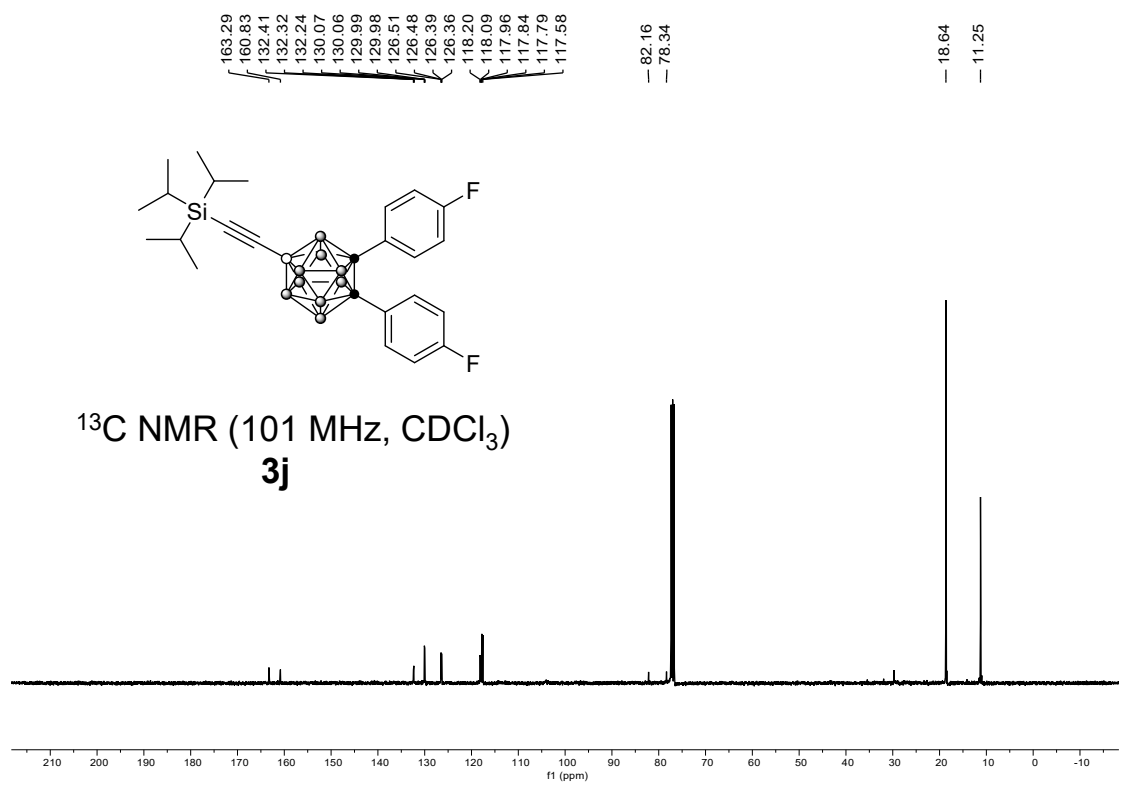

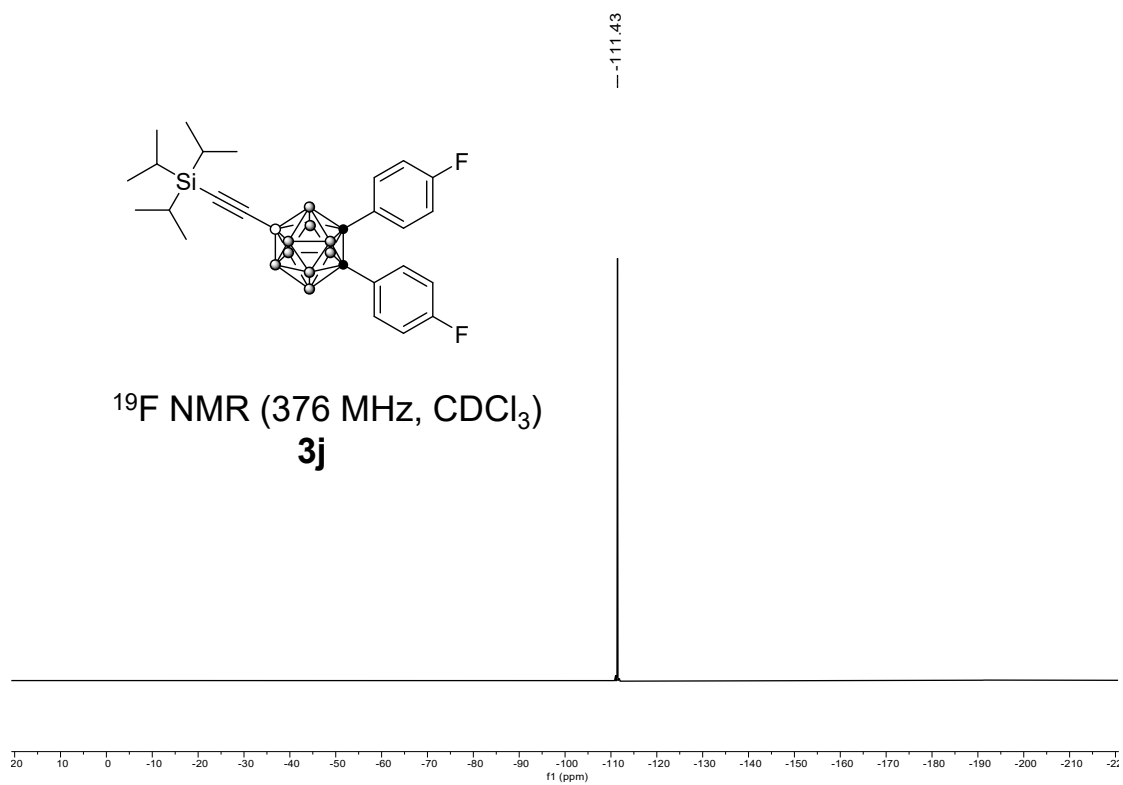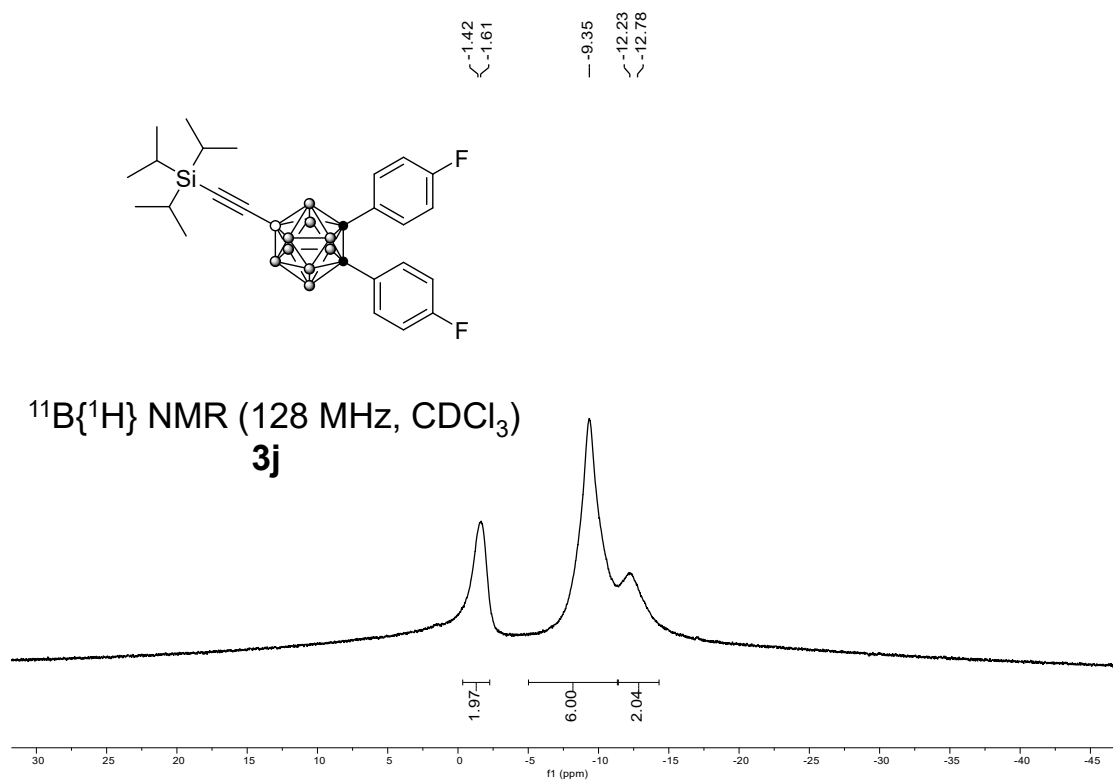

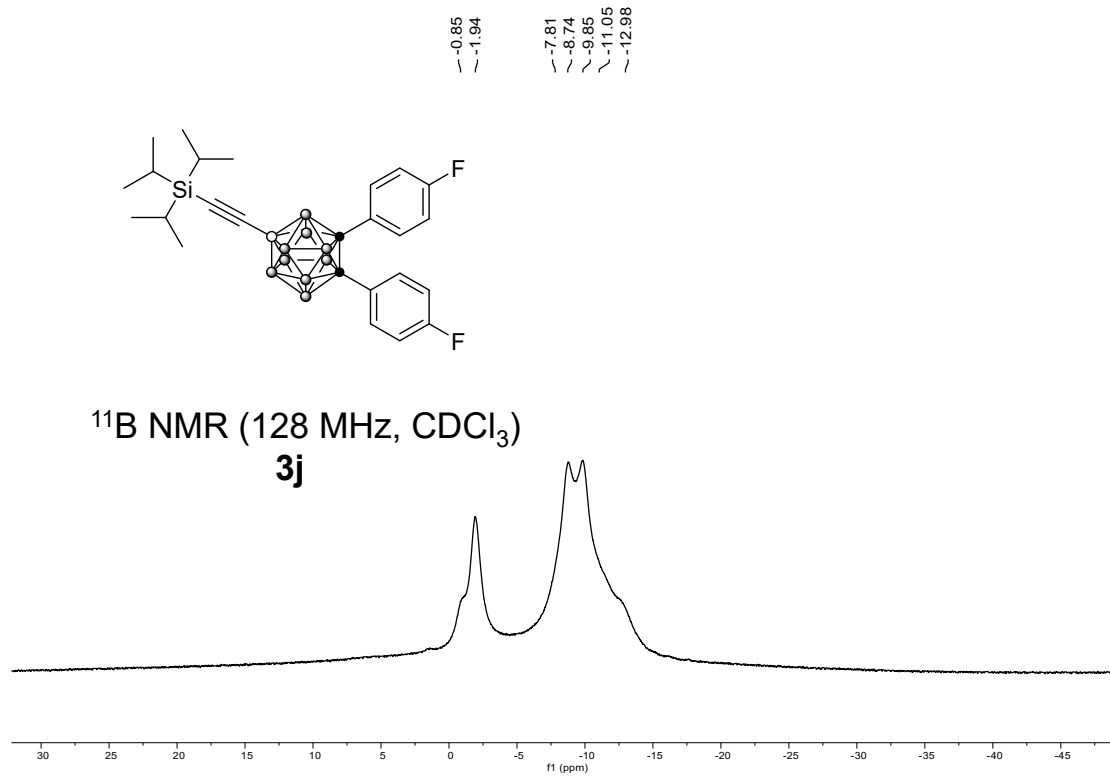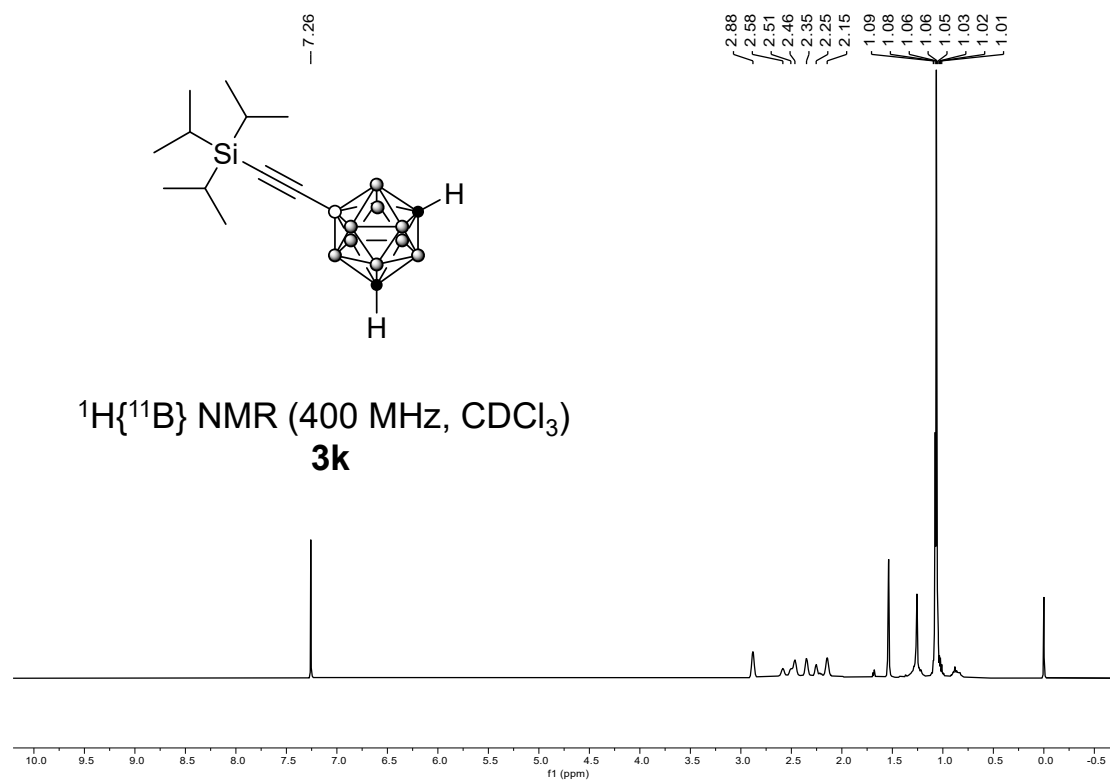

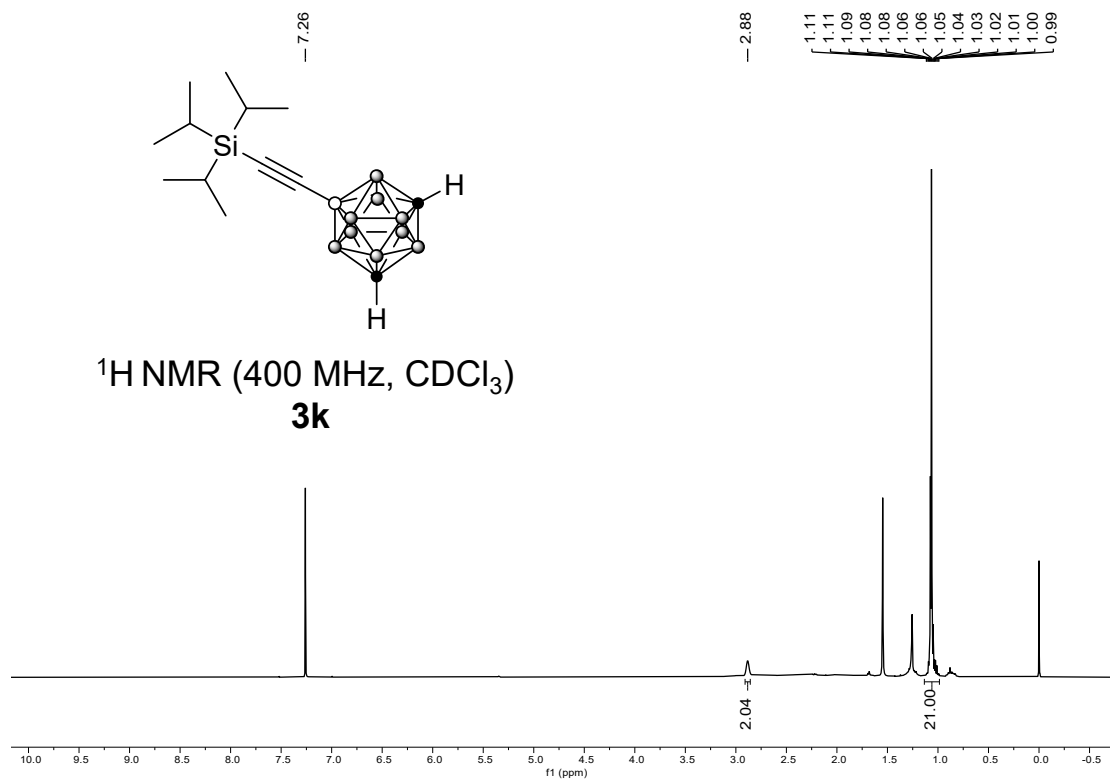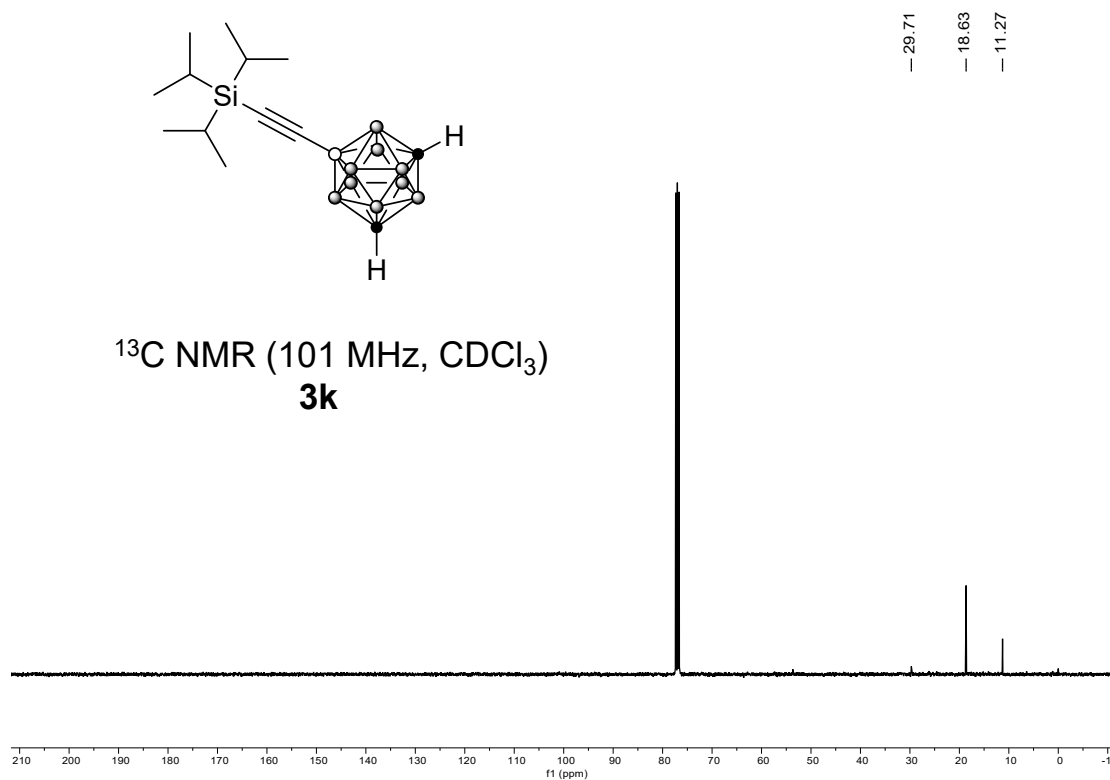

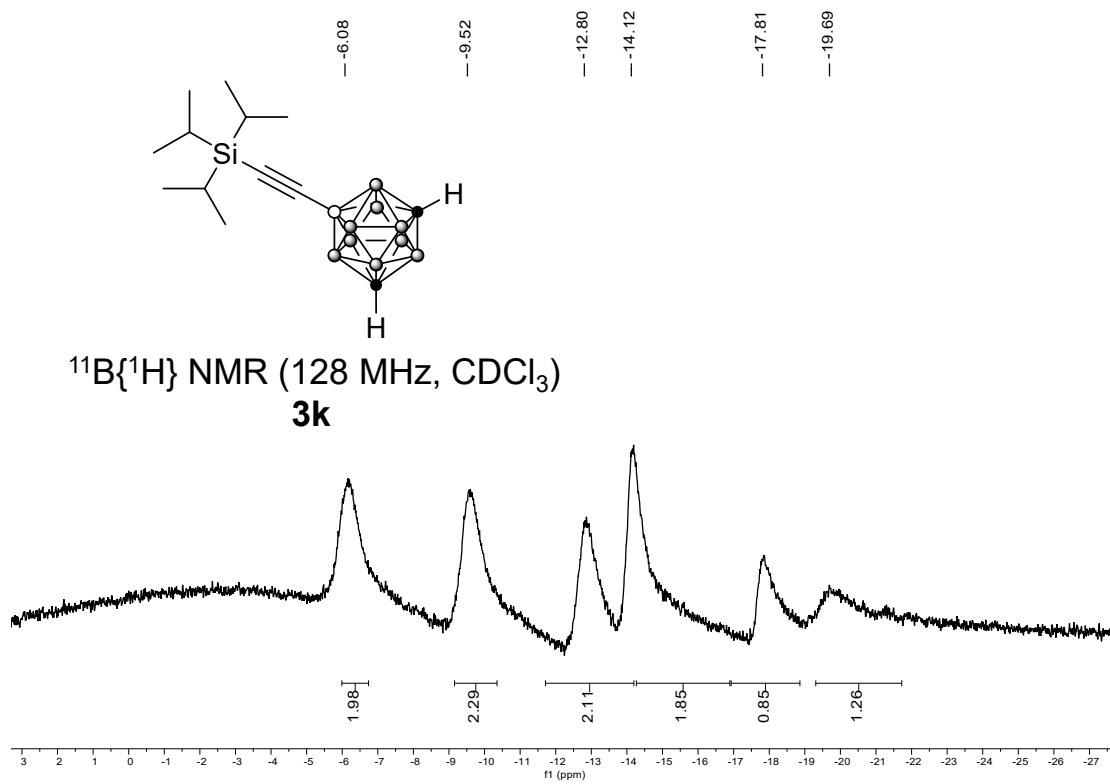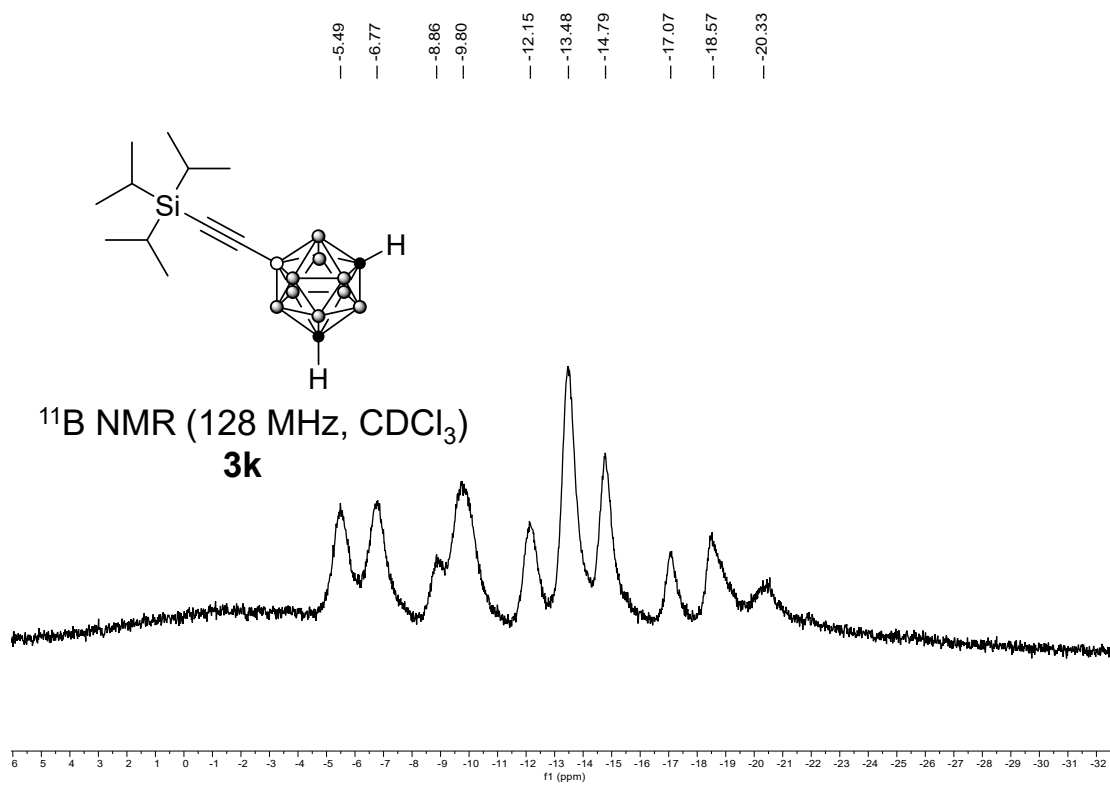

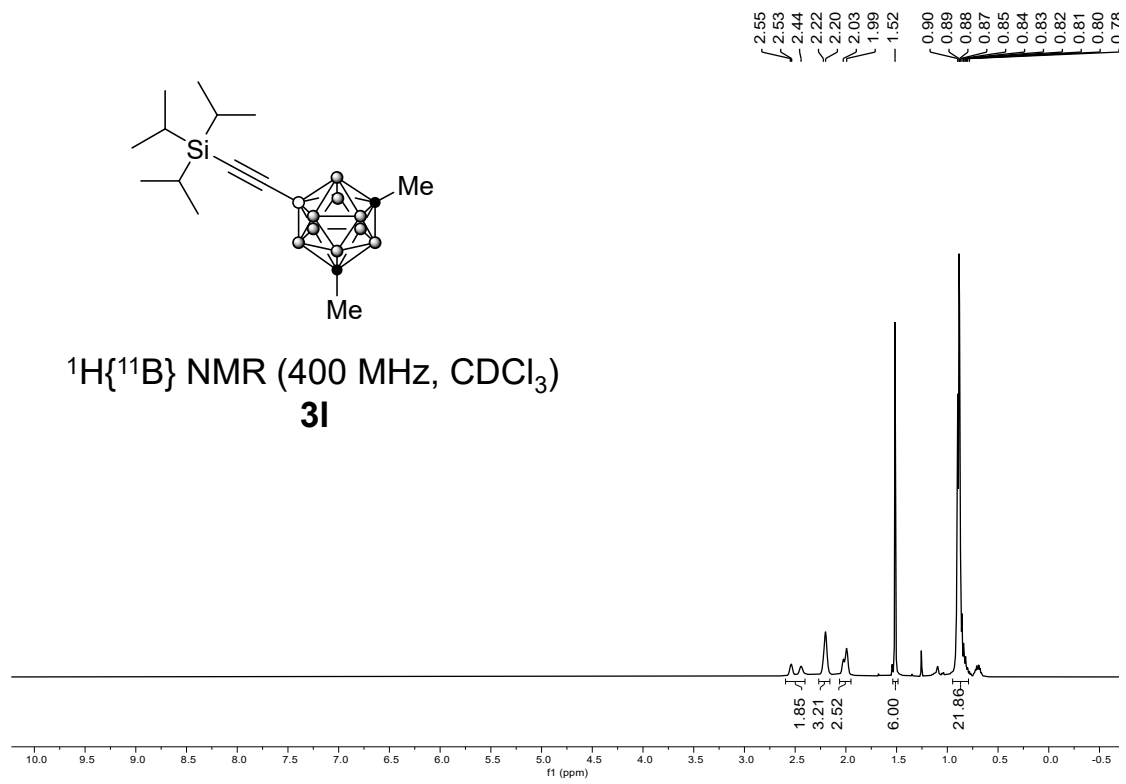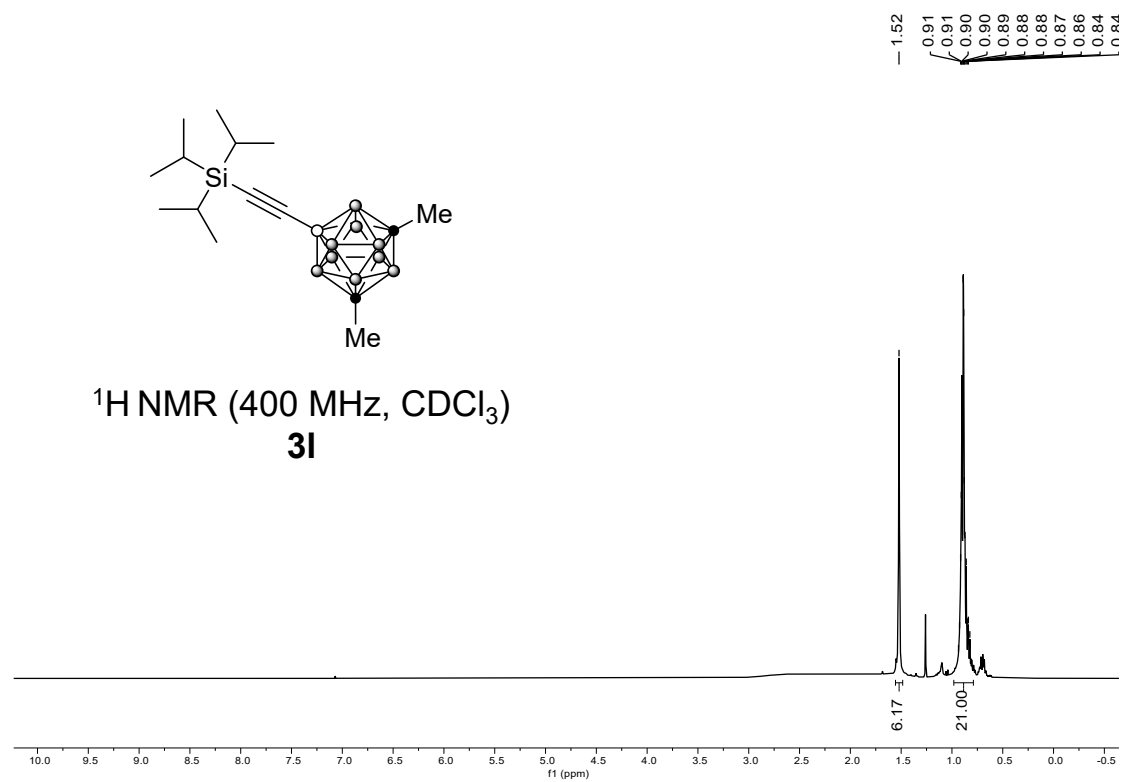

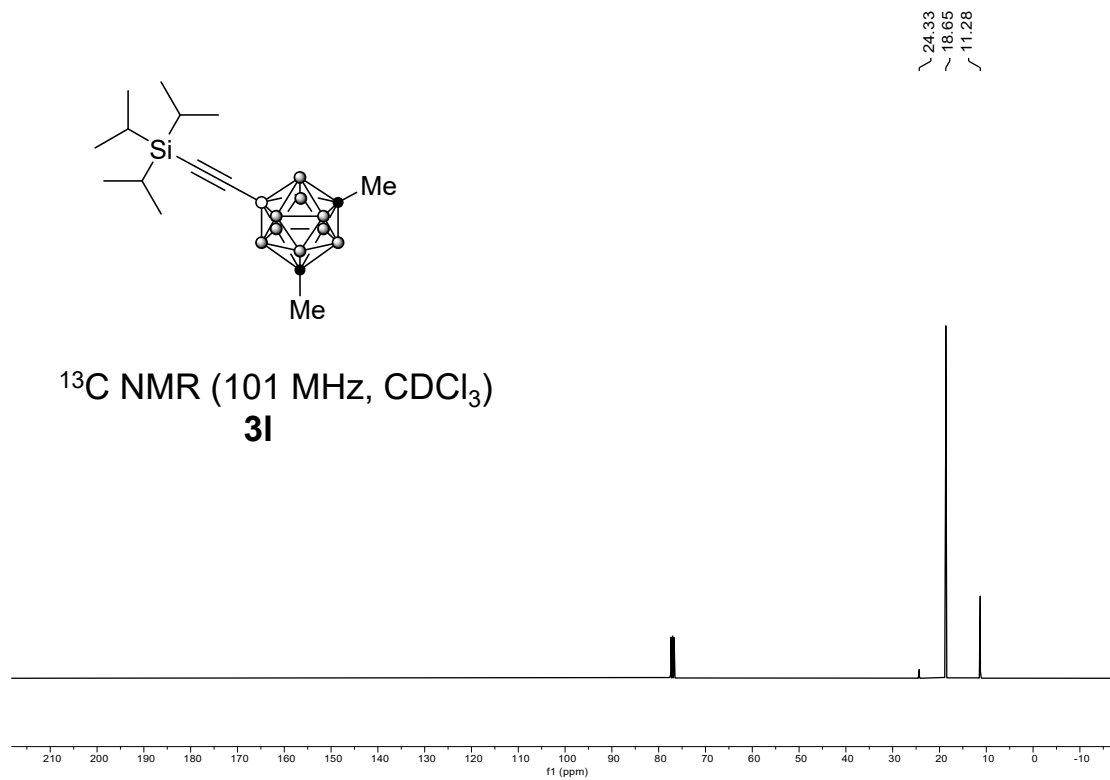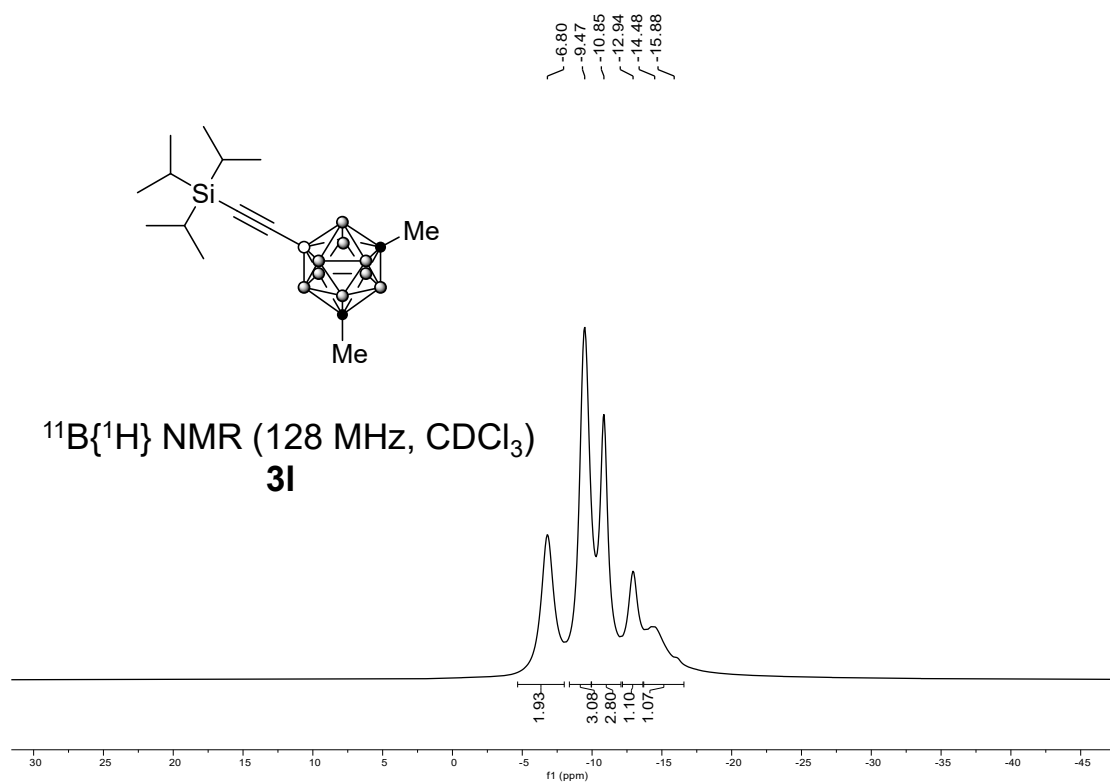

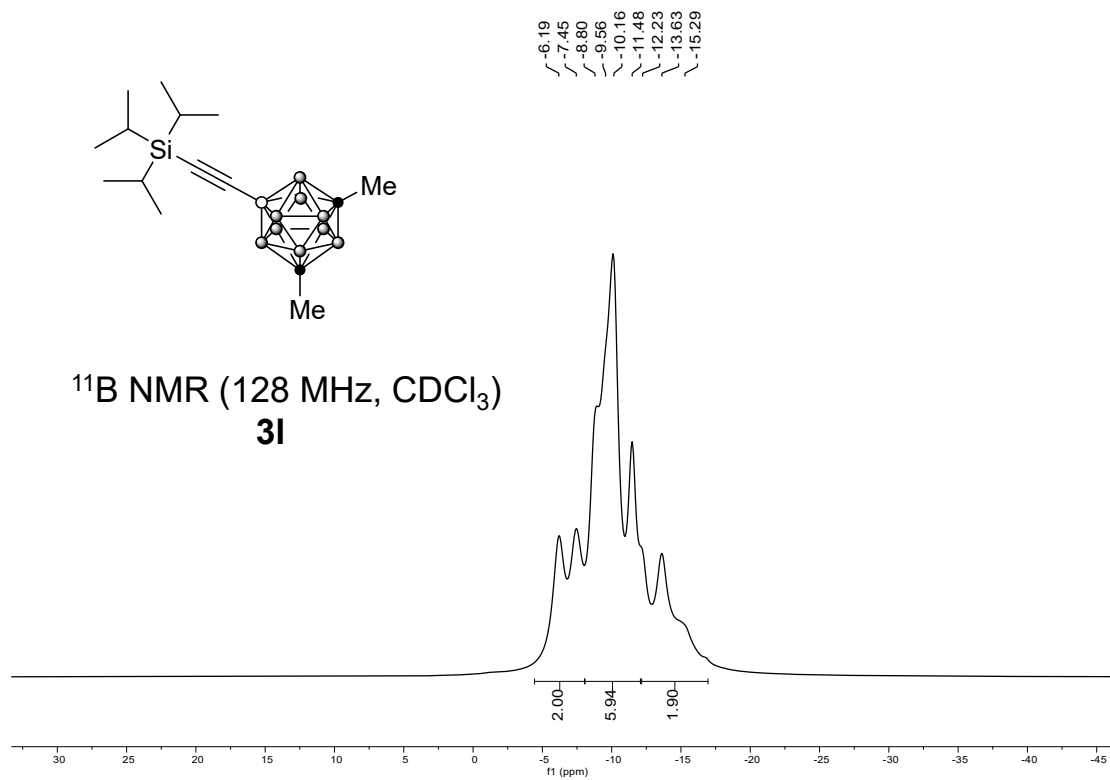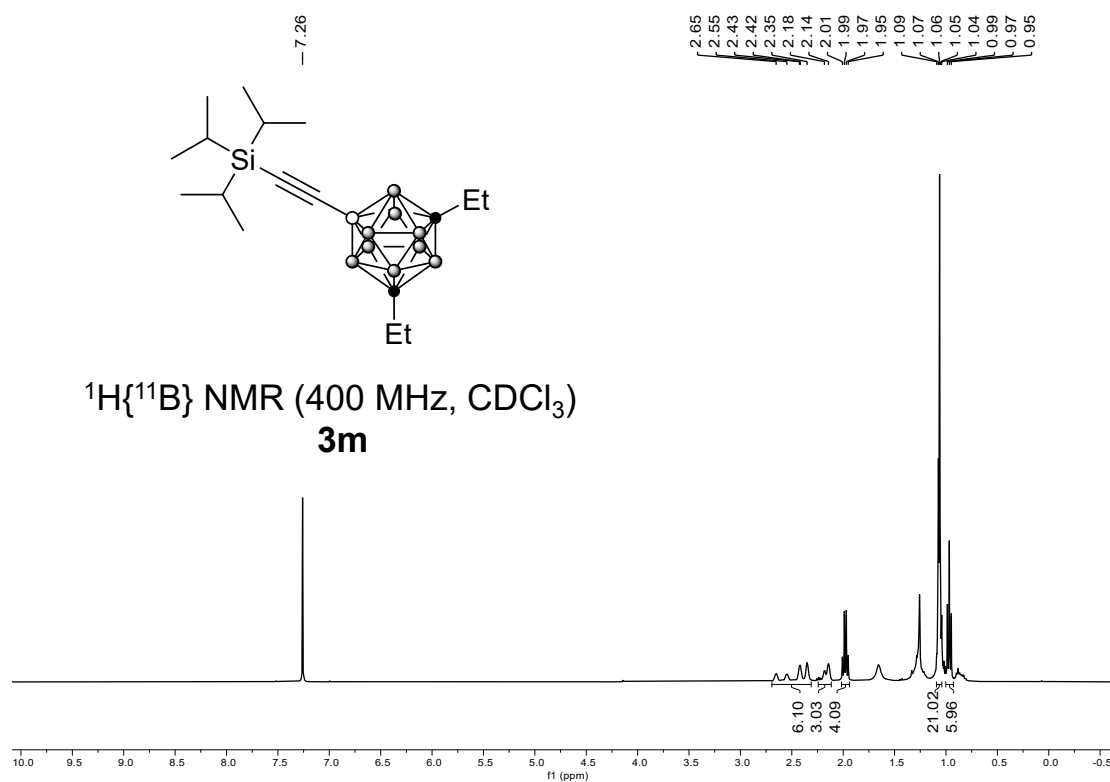



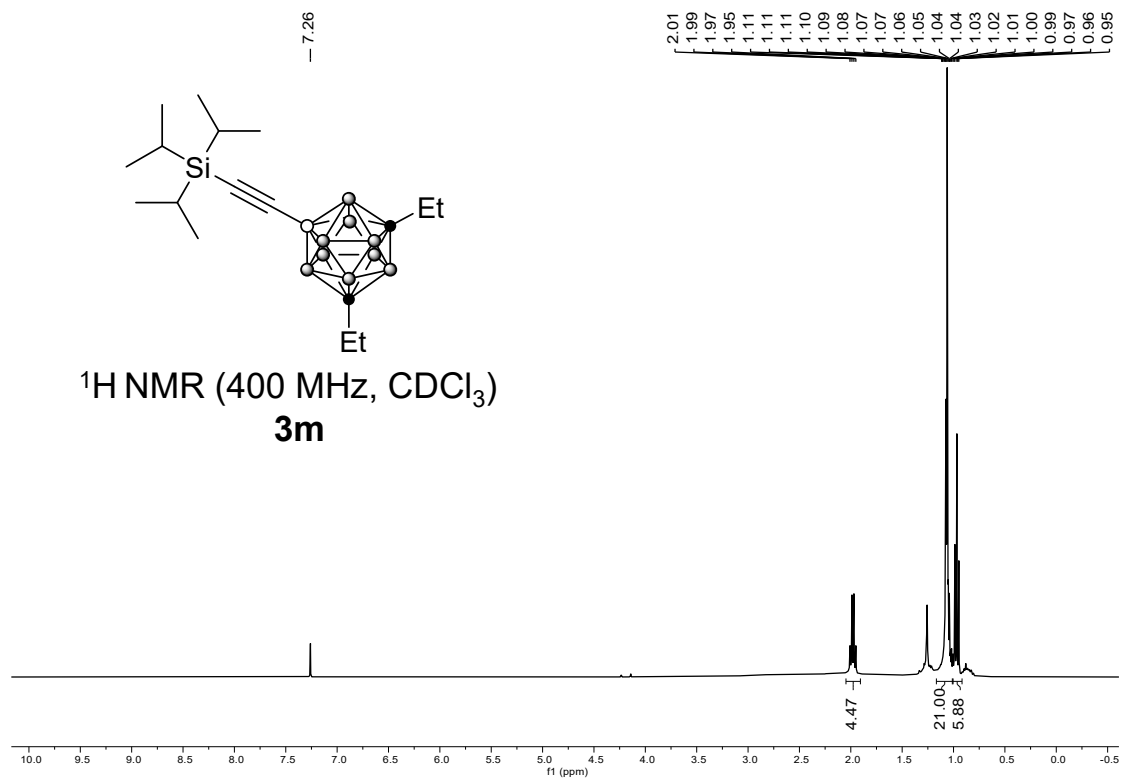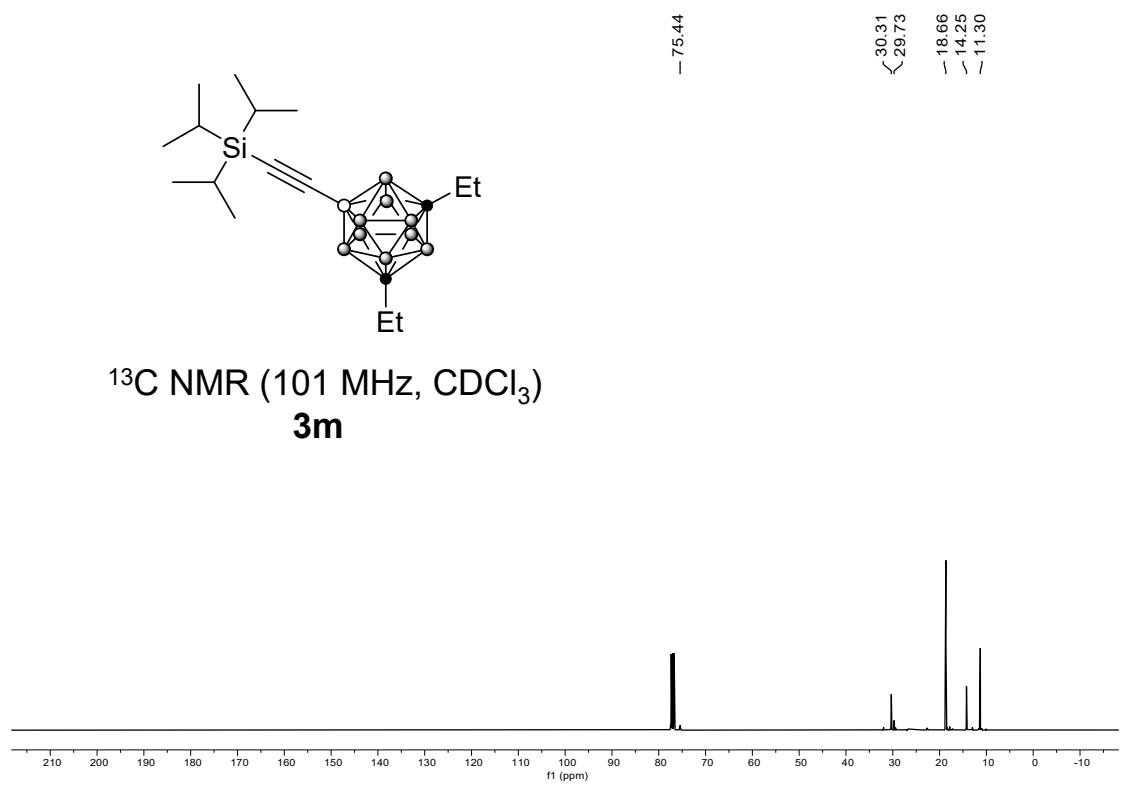

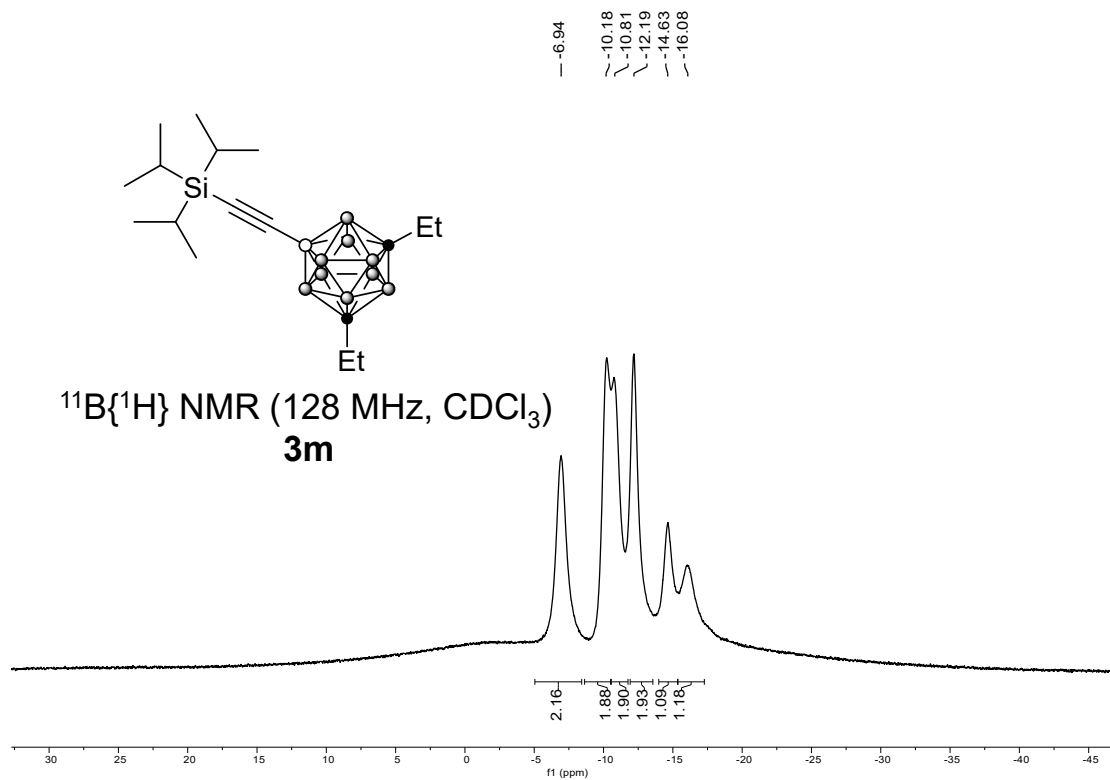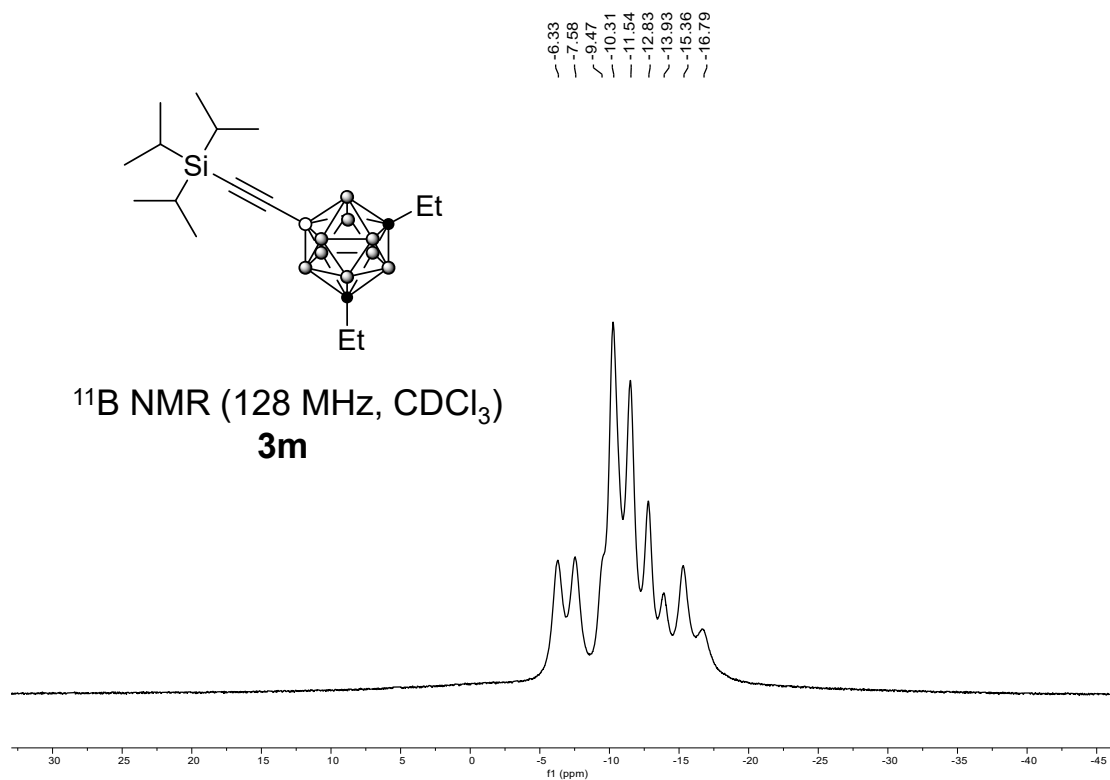

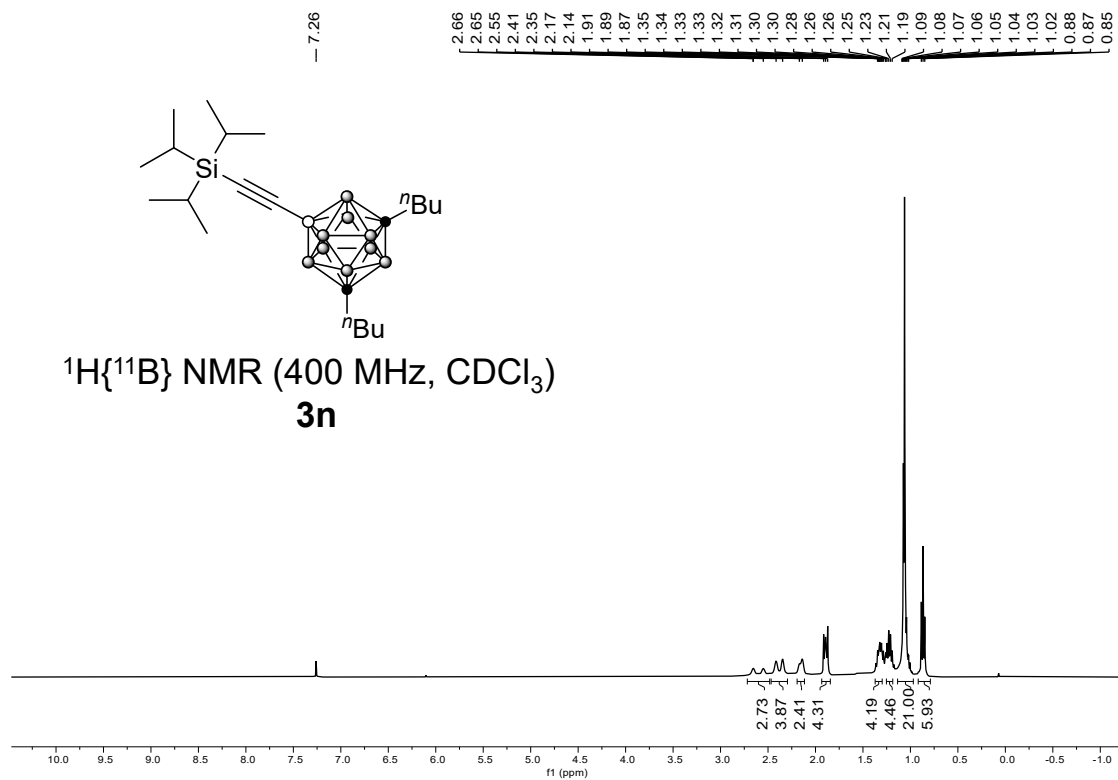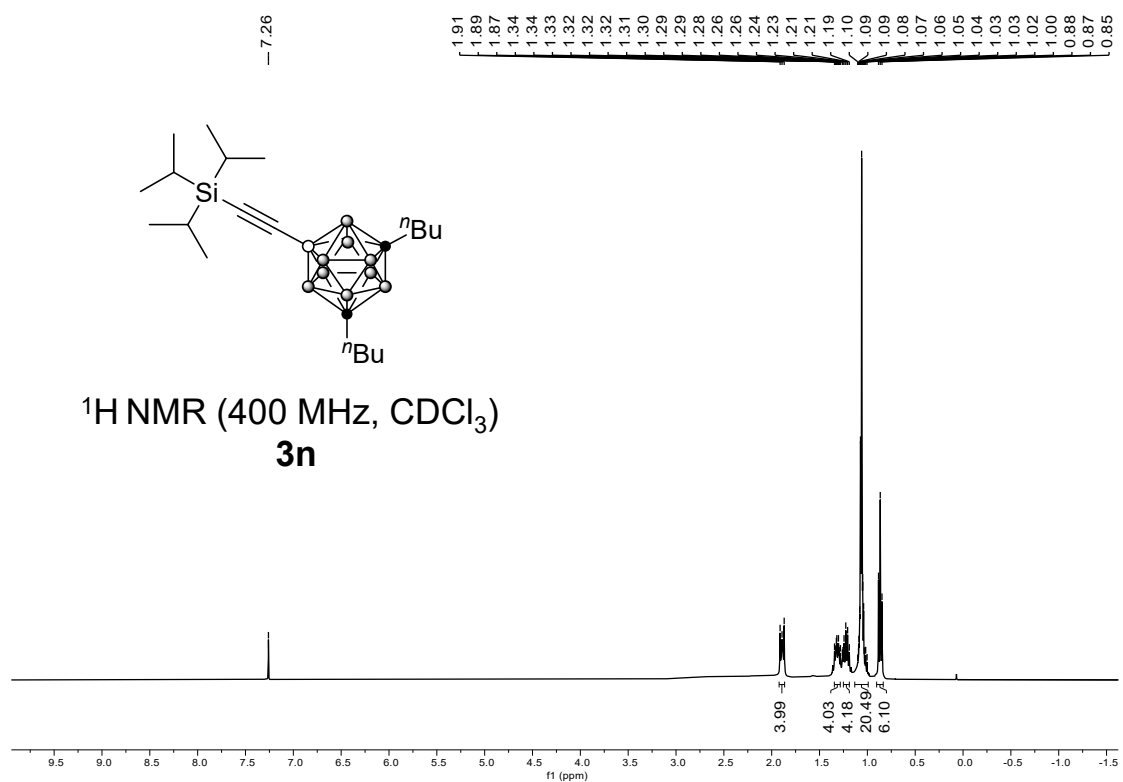

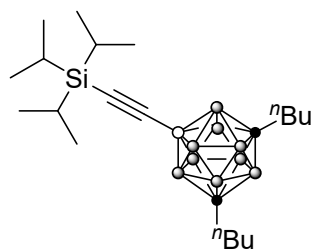

$^{13}\text{C}$  NMR (101 MHz,  $\text{CDCl}_3$ )  
**3n**

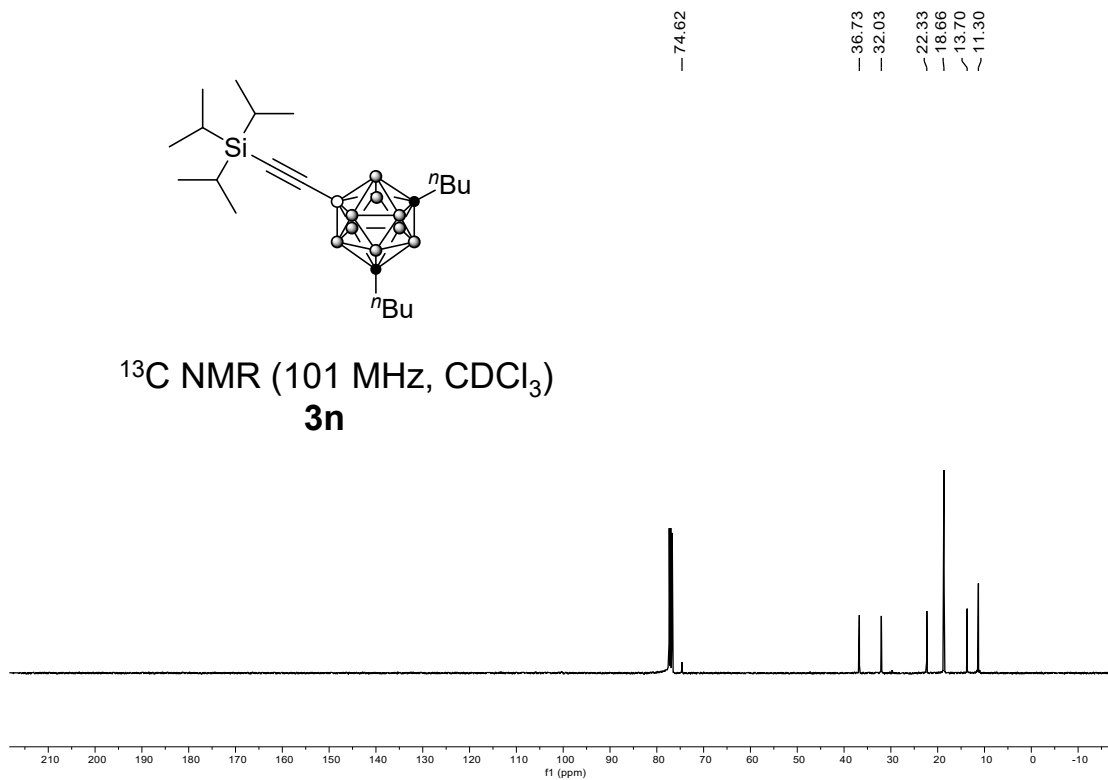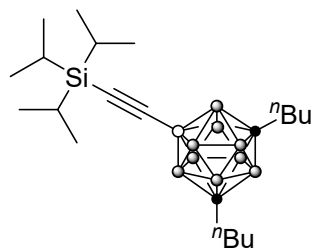

$^{11}\text{B}\{^1\text{H}\}$  NMR (128 MHz,  $\text{CDCl}_3$ )  
**3n**

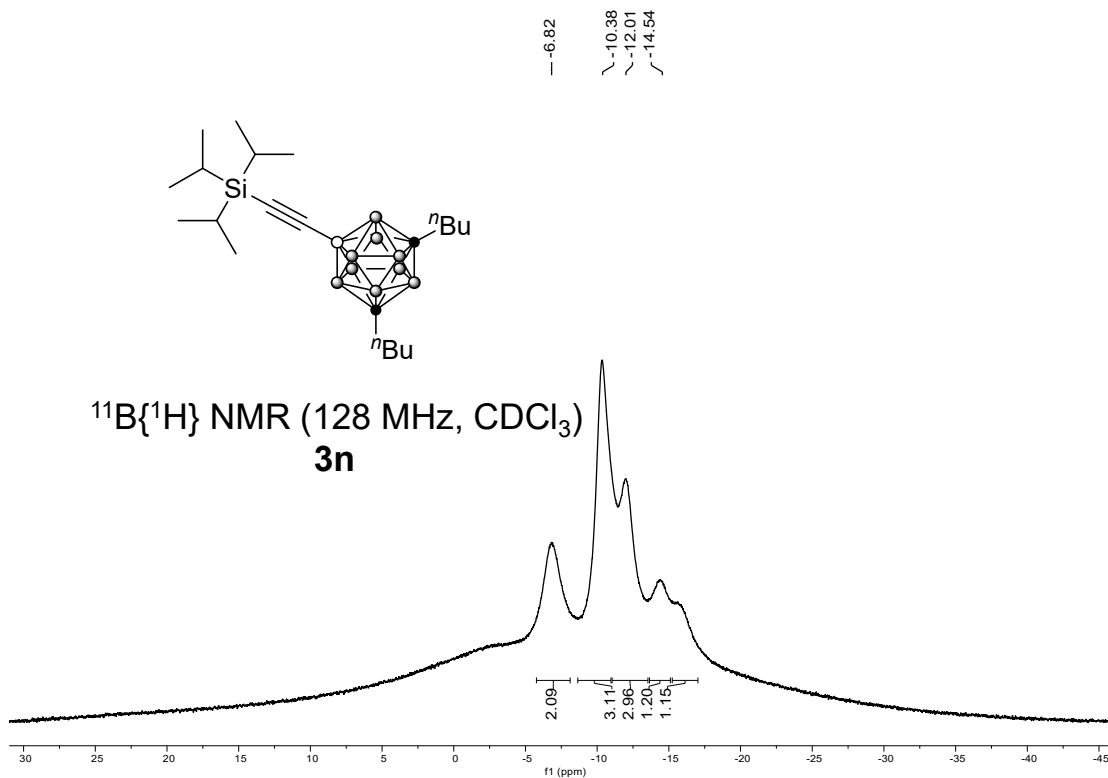

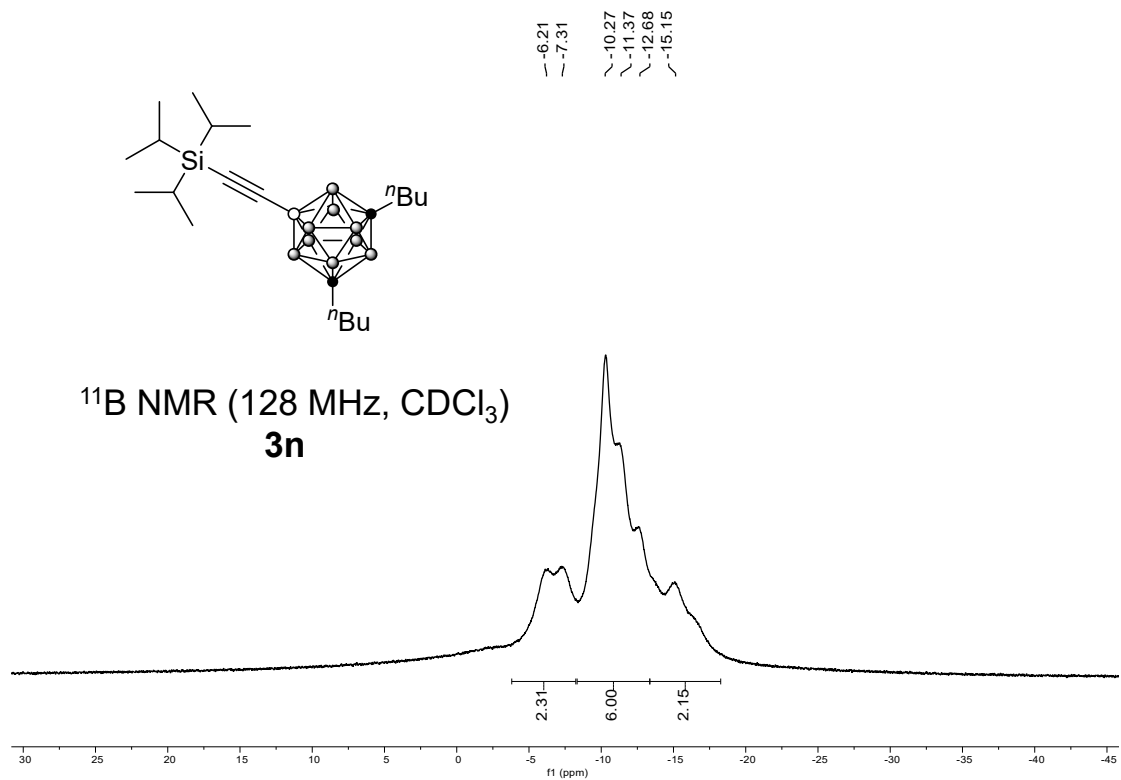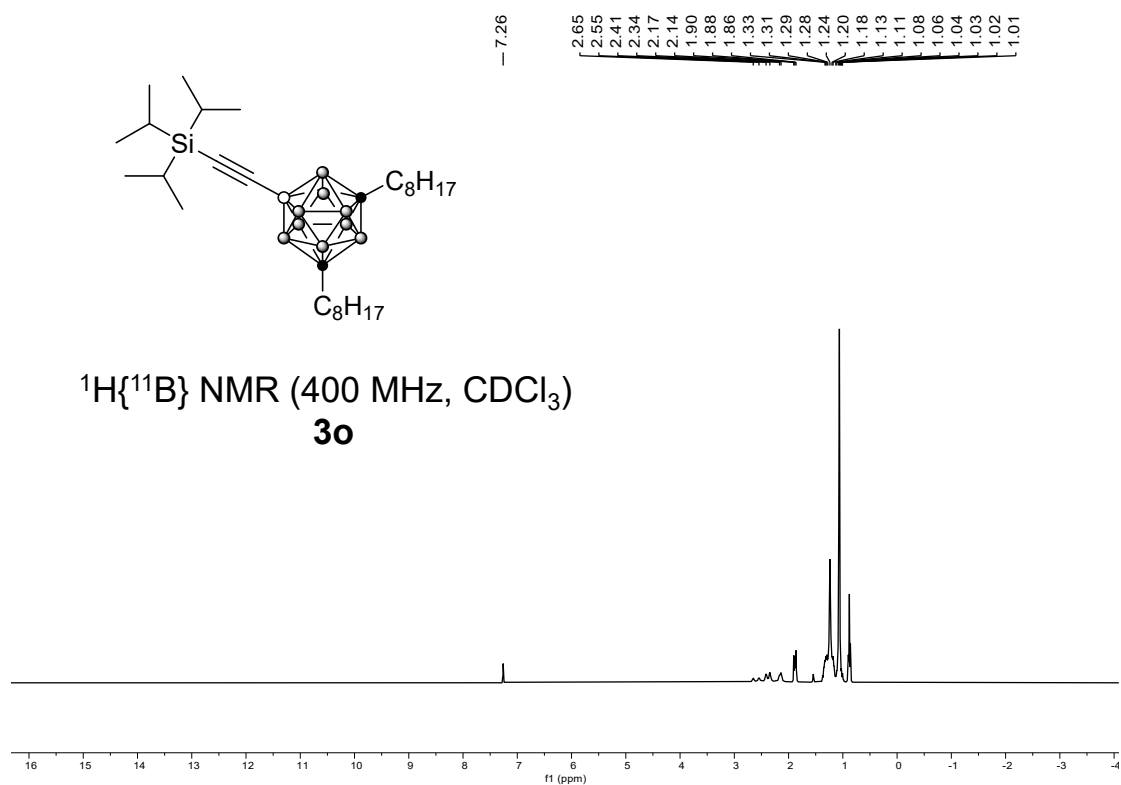

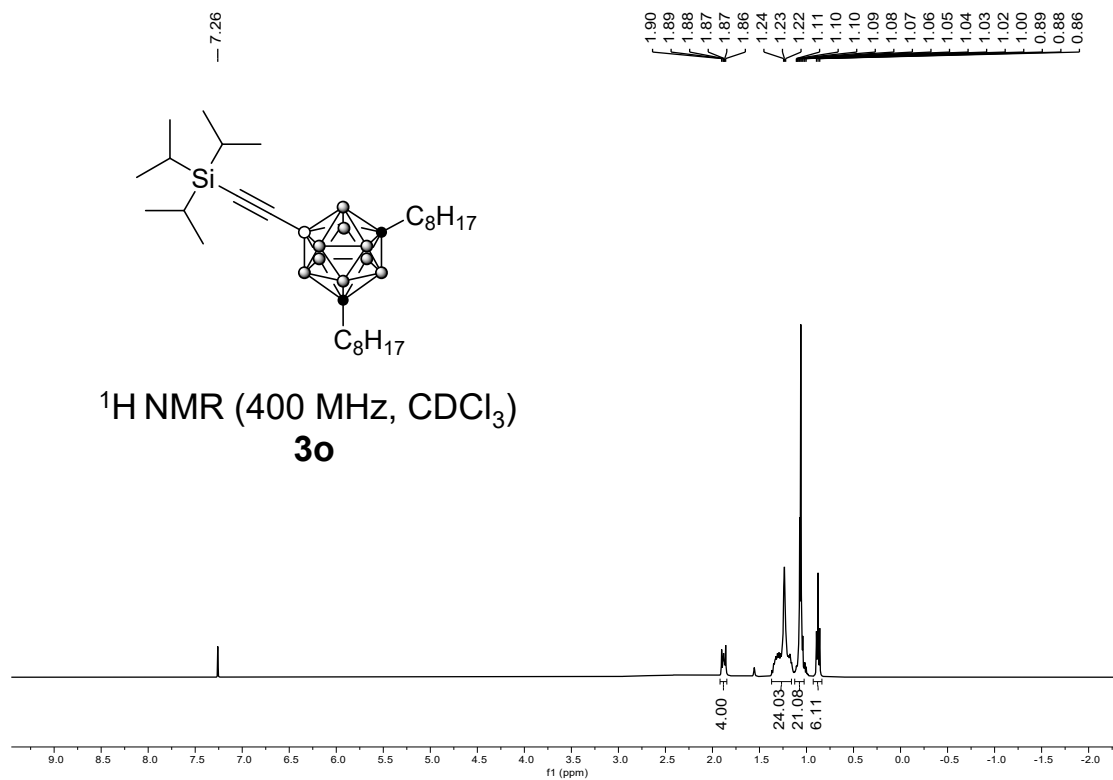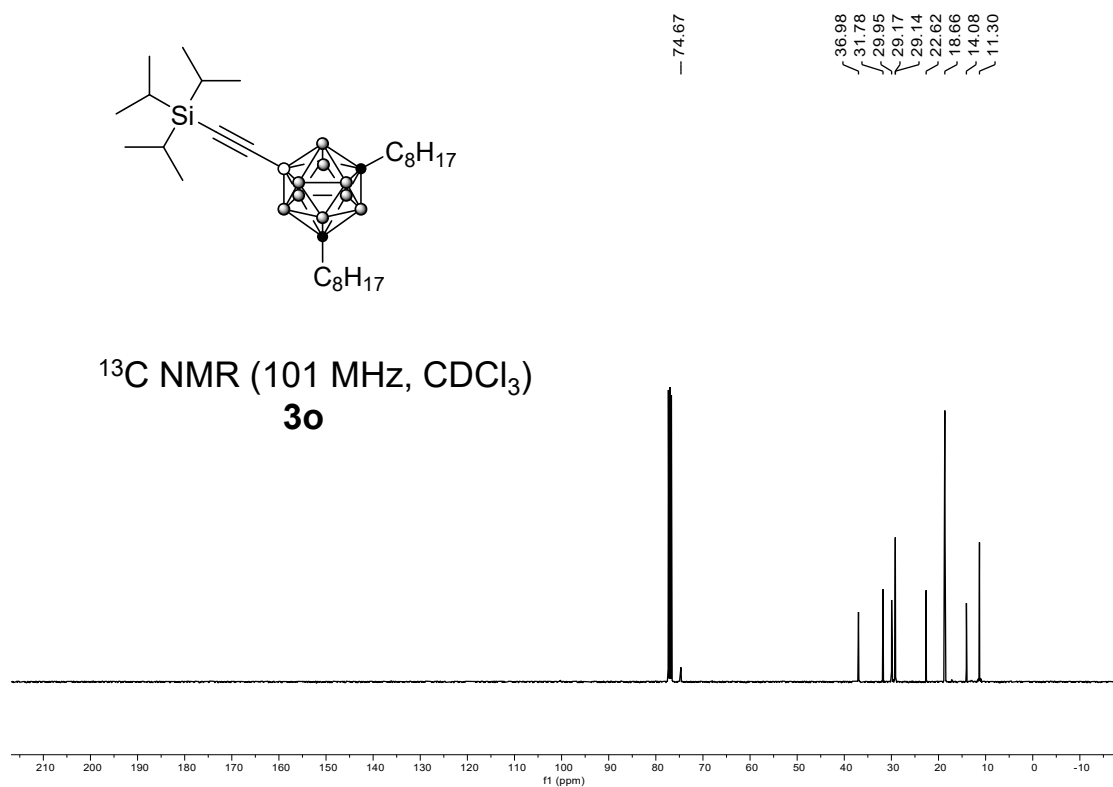

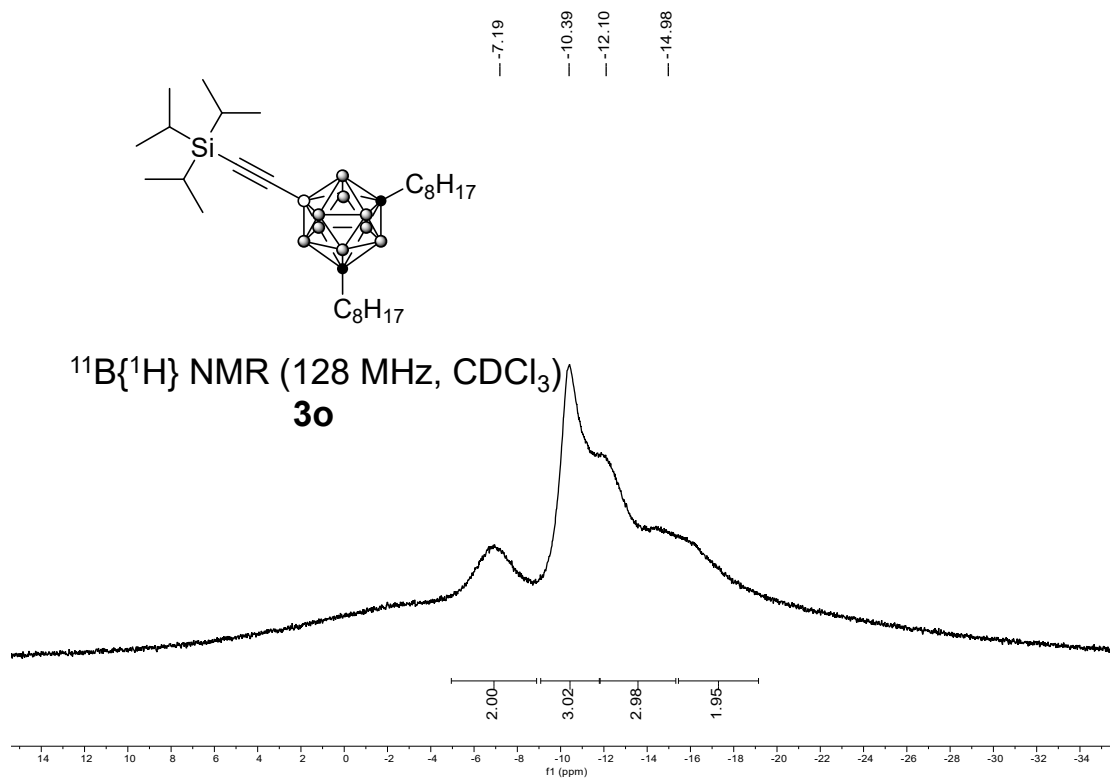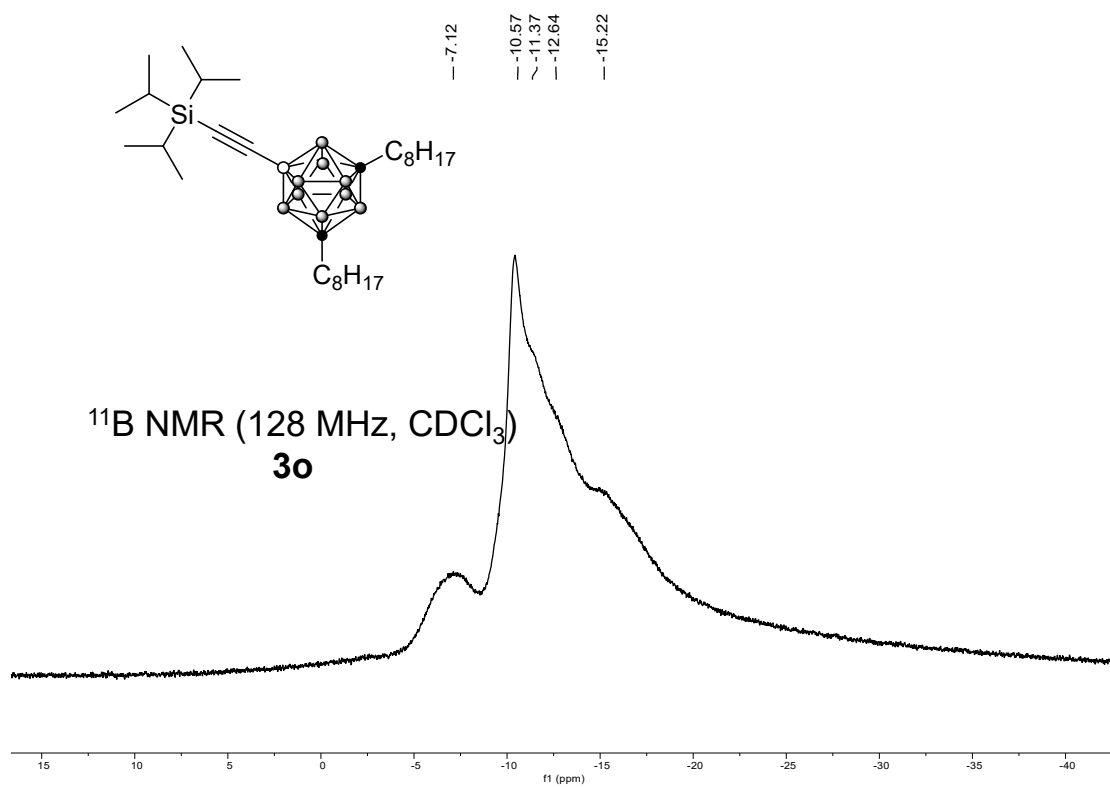

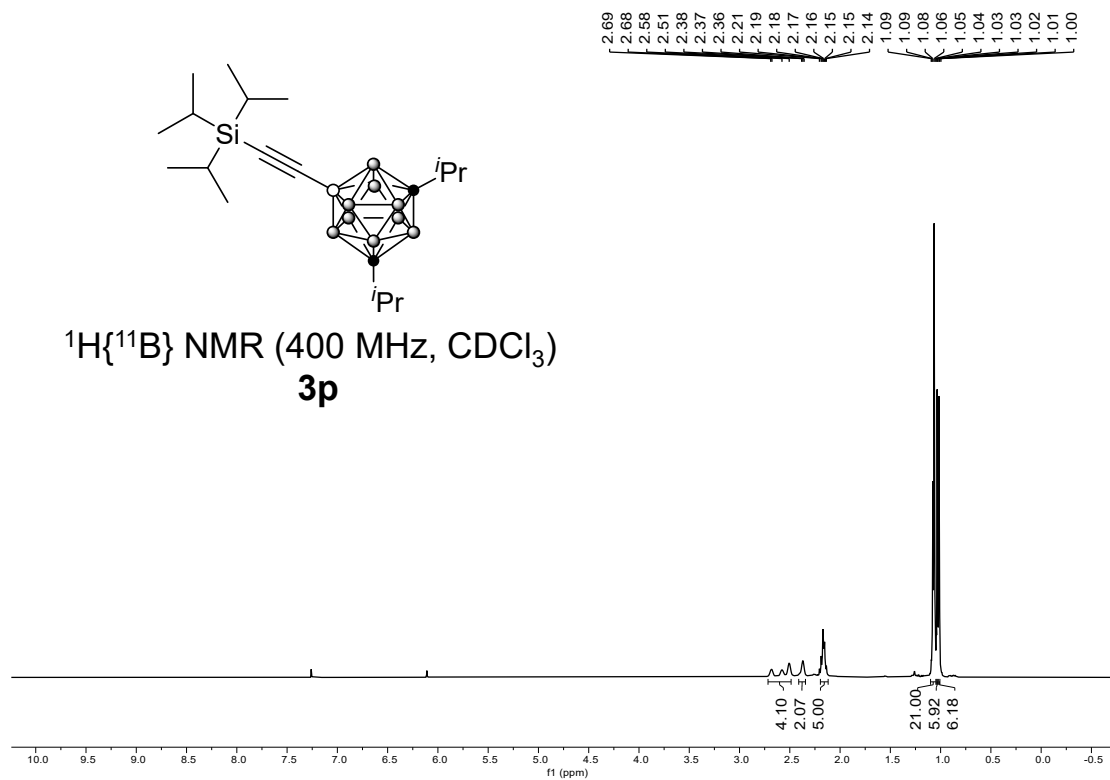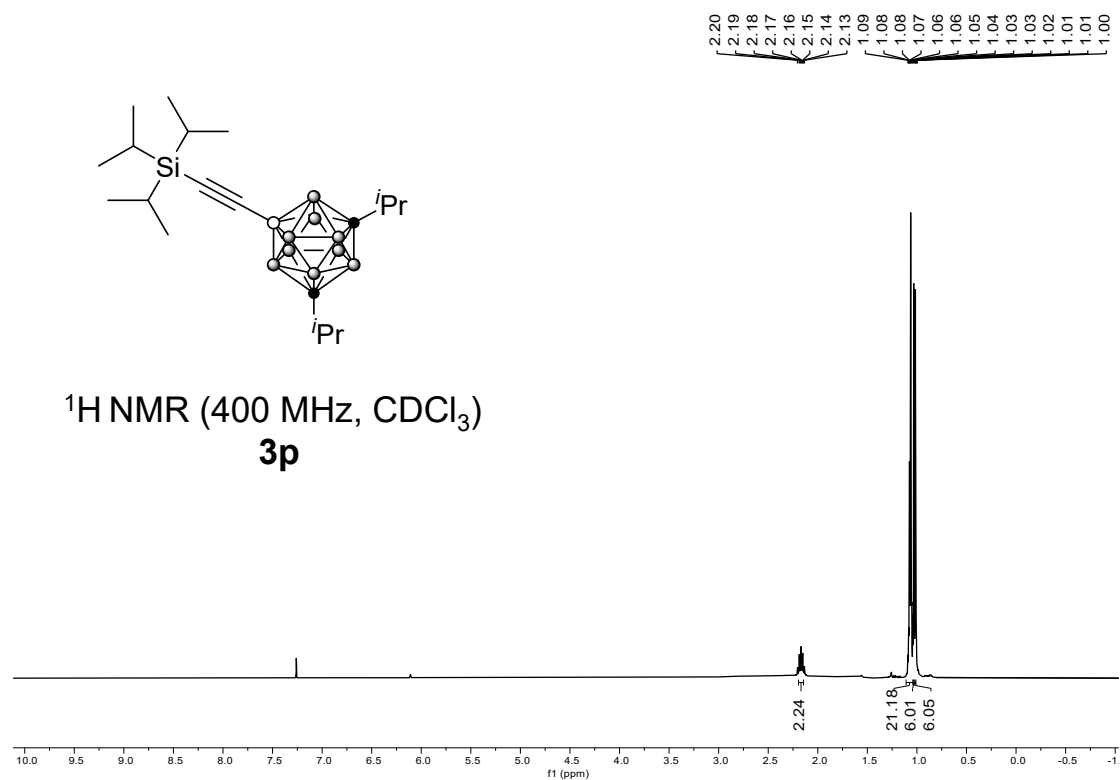



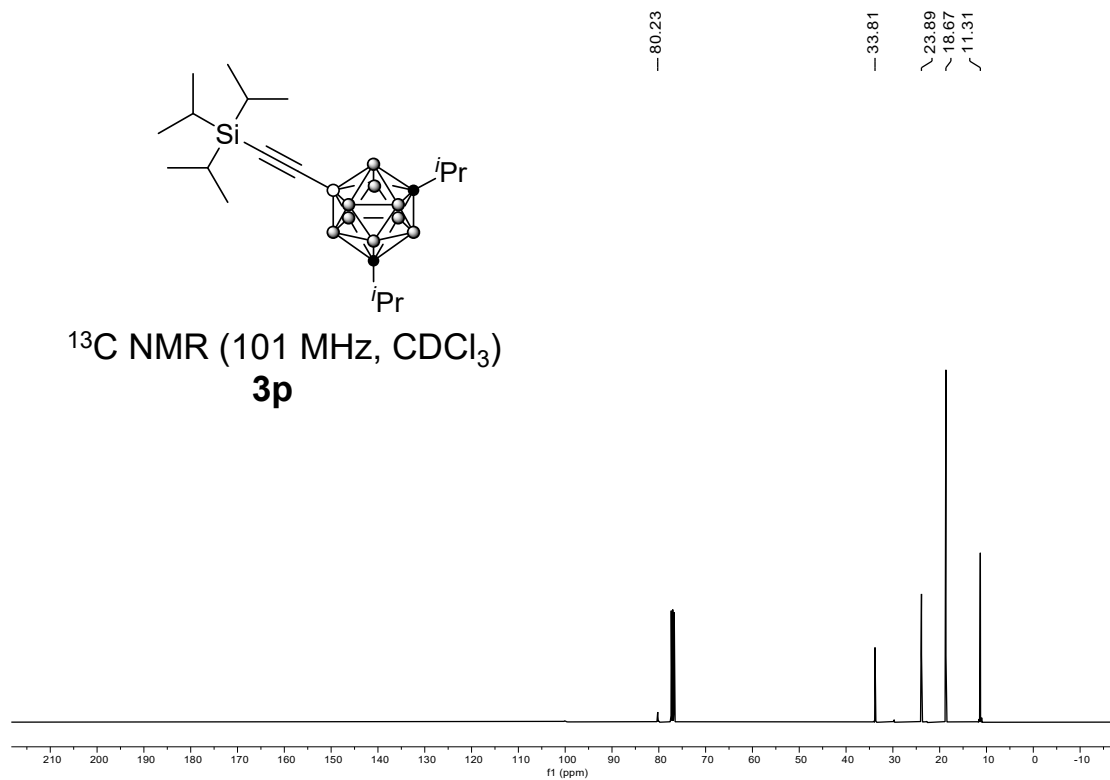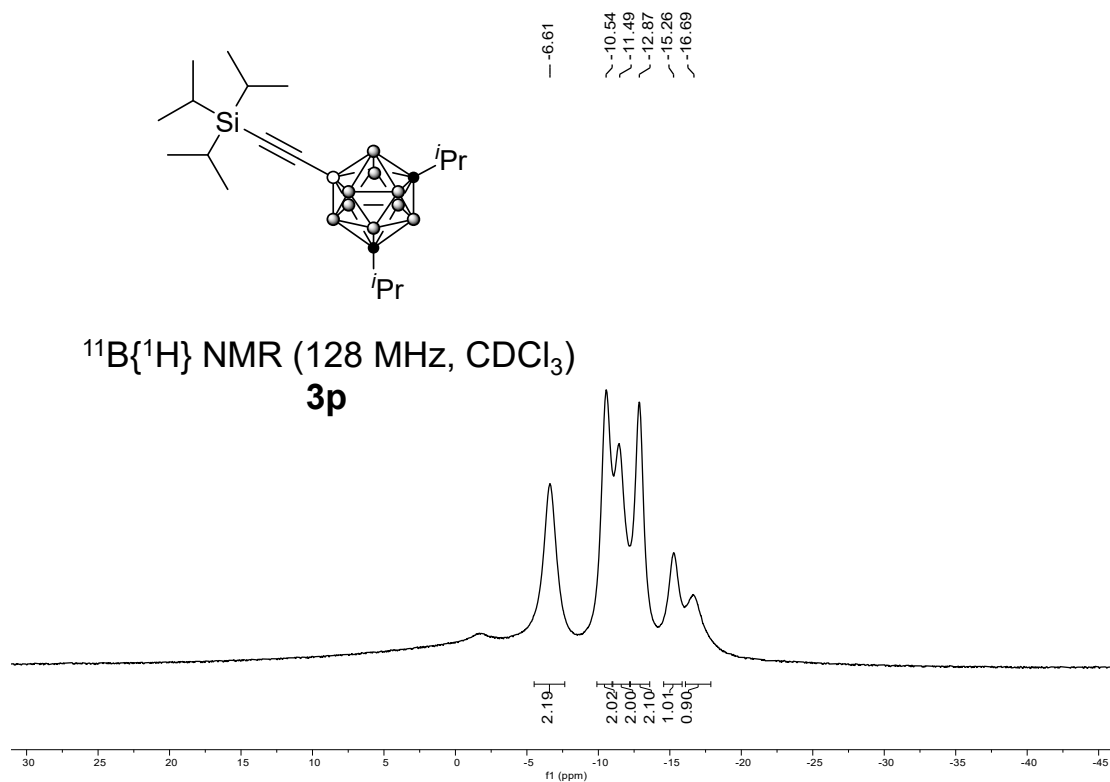

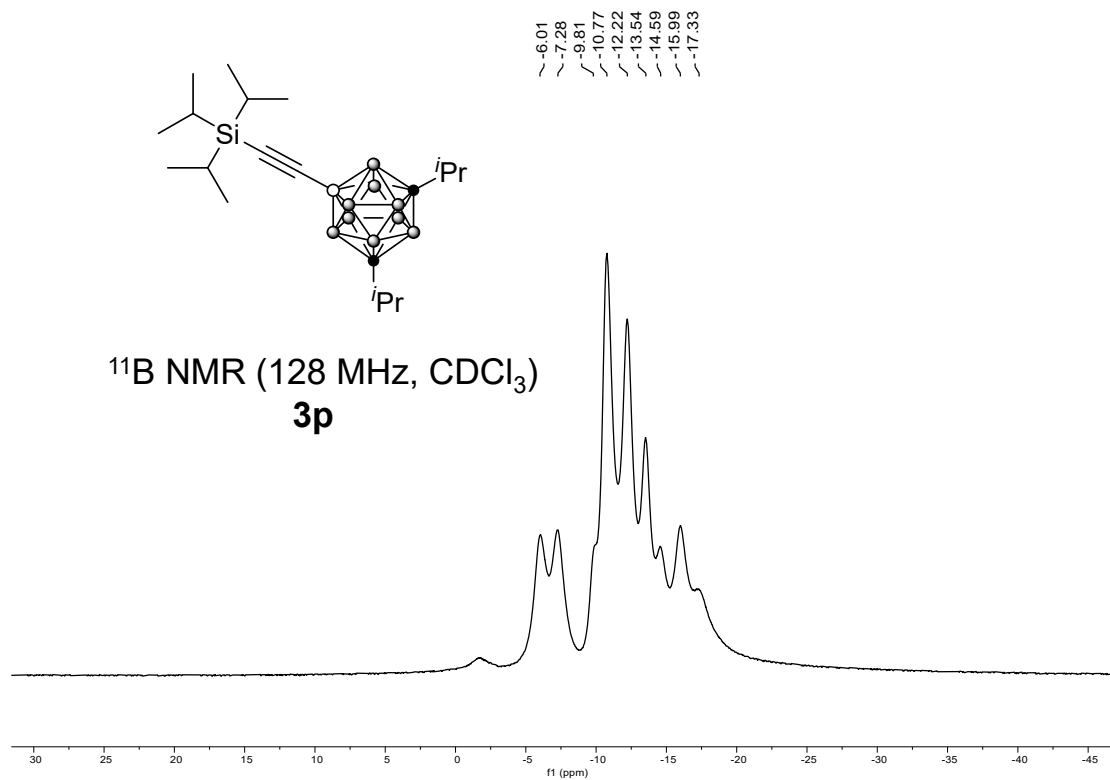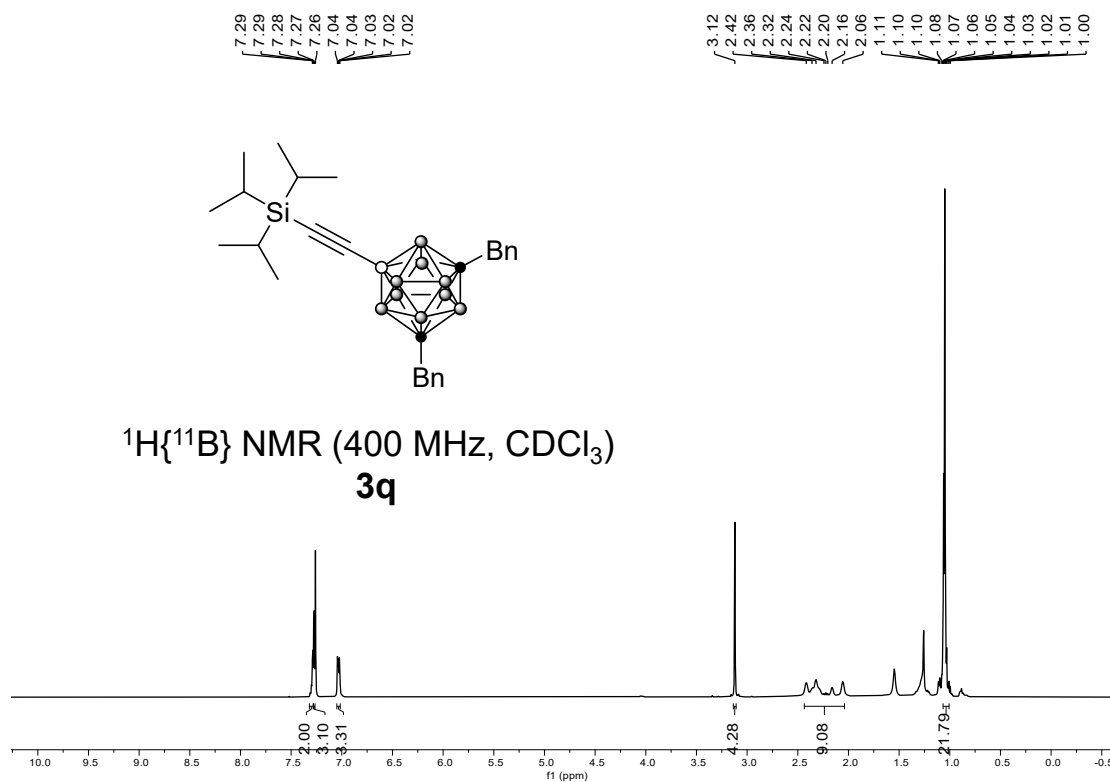

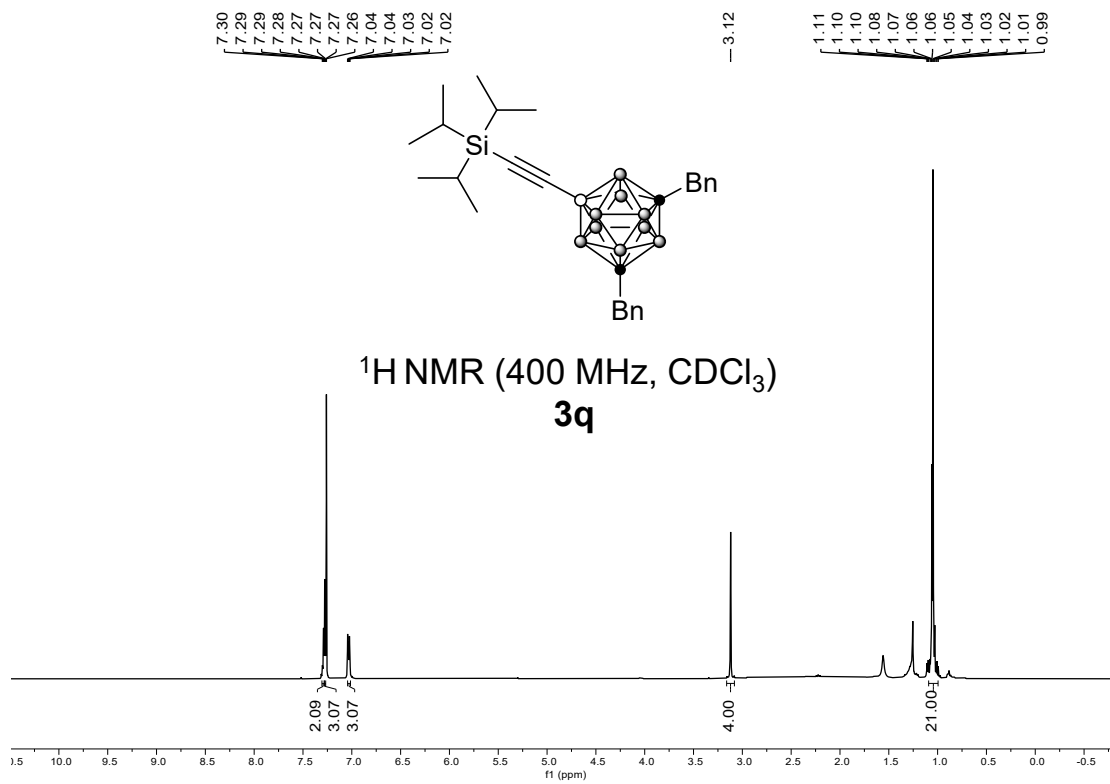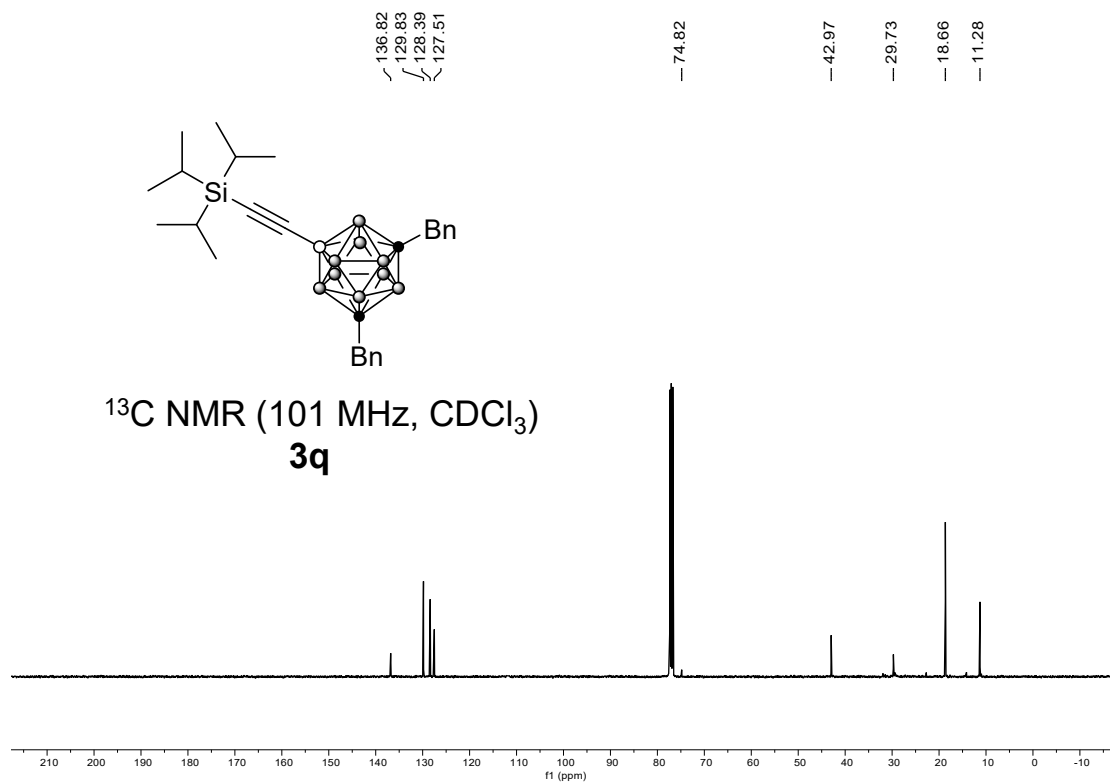

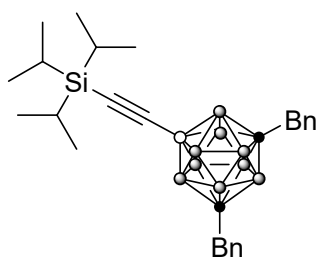

— -6.34  
 — -9.99  
 — -11.88  
 — -14.98

$^{11}\text{B}\{^1\text{H}\}$  NMR (128 MHz,  $\text{CDCl}_3$ )  
**3q**

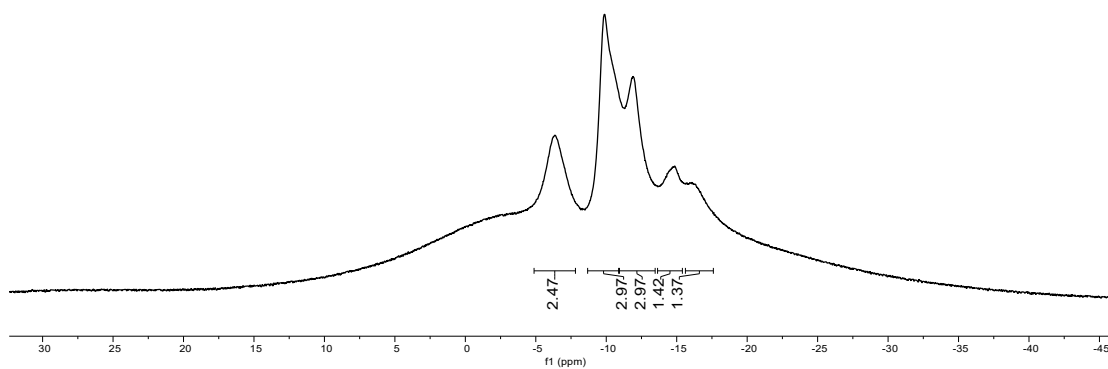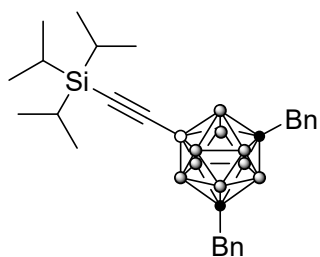

— -6.51  
 / -9.81  
 / -11.14  
 / -11.39  
 / -12.53  
 / -15.38  
 / -15.54

$^{11}\text{B}$  NMR (128 MHz,  $\text{CDCl}_3$ )  
**3q**

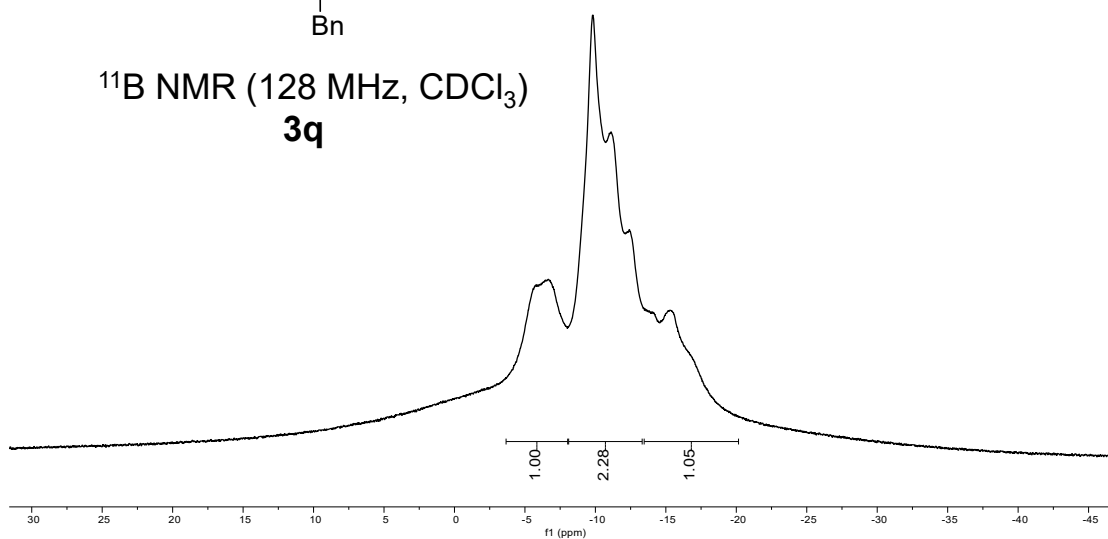

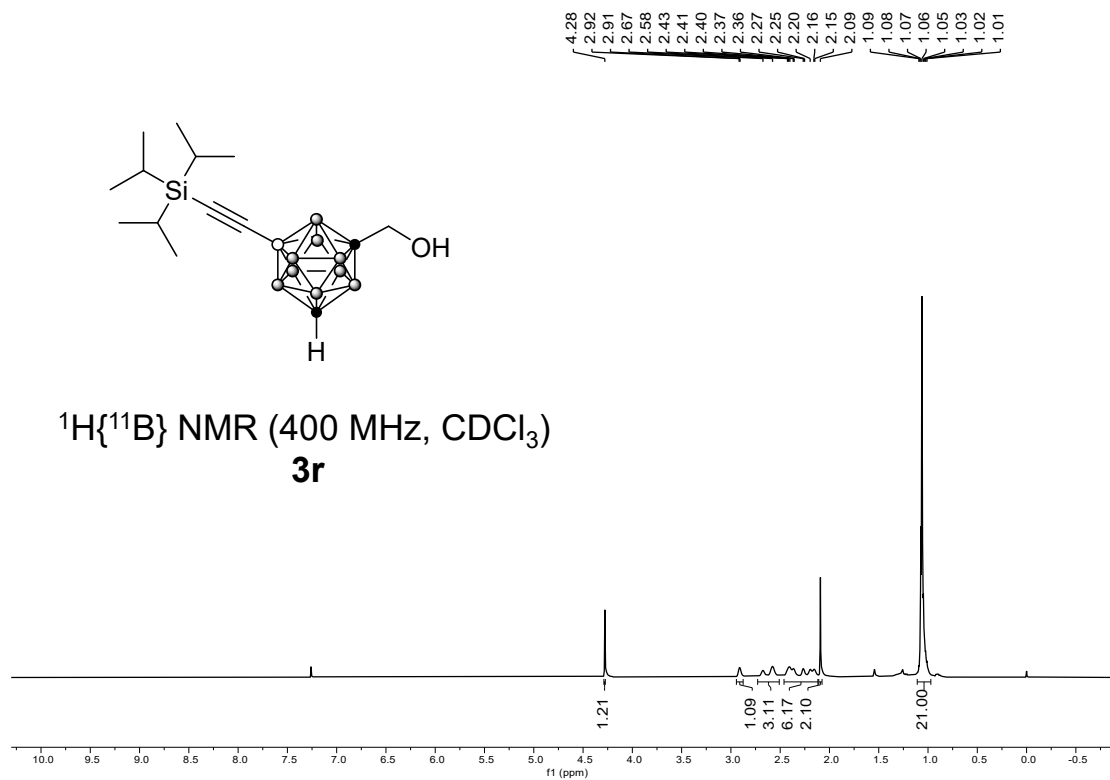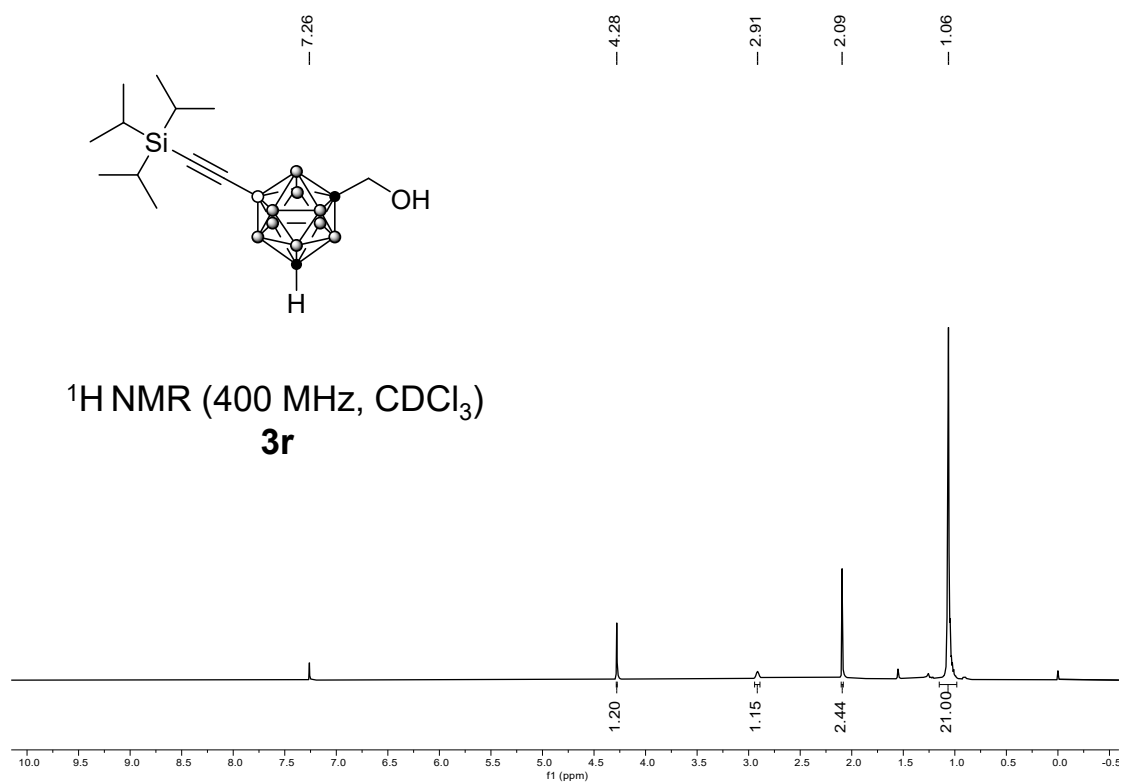

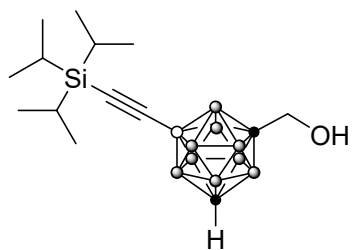

-64.21

-20.46  
-18.62  
-11.26

$^{13}\text{C}$  NMR (101 MHz,  $\text{CDCl}_3$ )  
**3r**

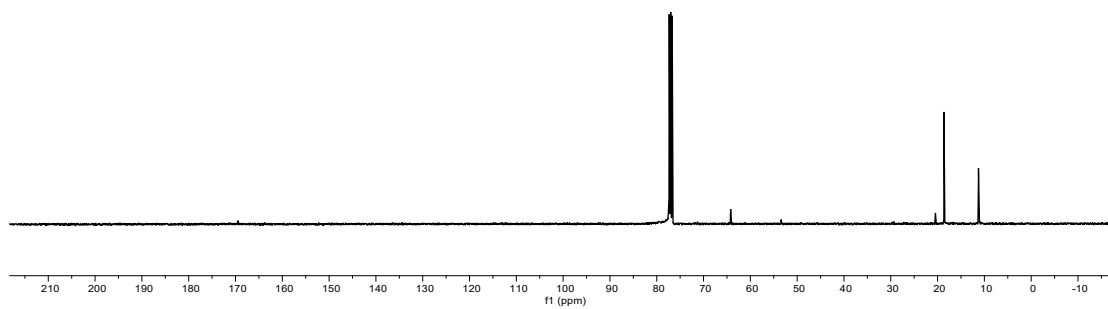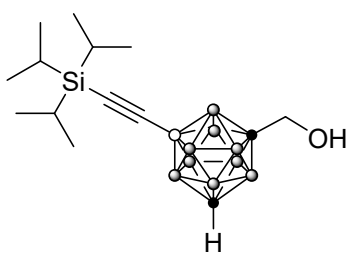

-4.30

-10.53

-12.53

-21.86

$^{11}\text{B}\{^1\text{H}\}$  NMR (128 MHz,  $\text{CDCl}_3$ )  
**3r**

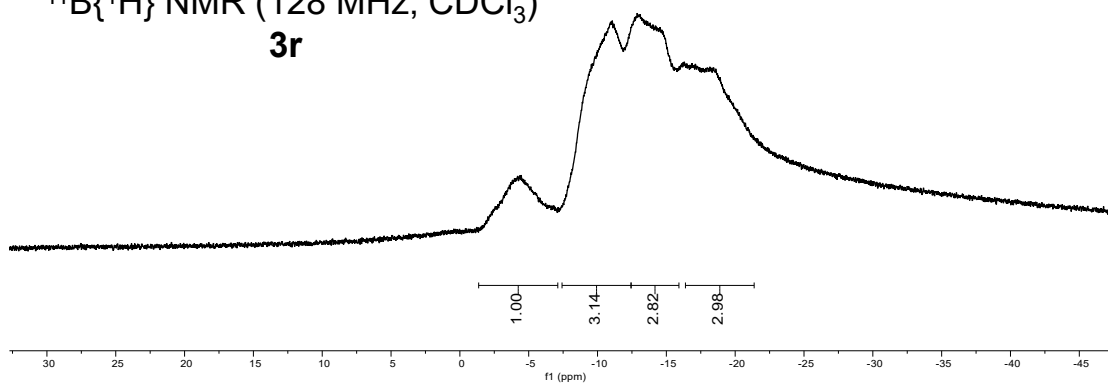

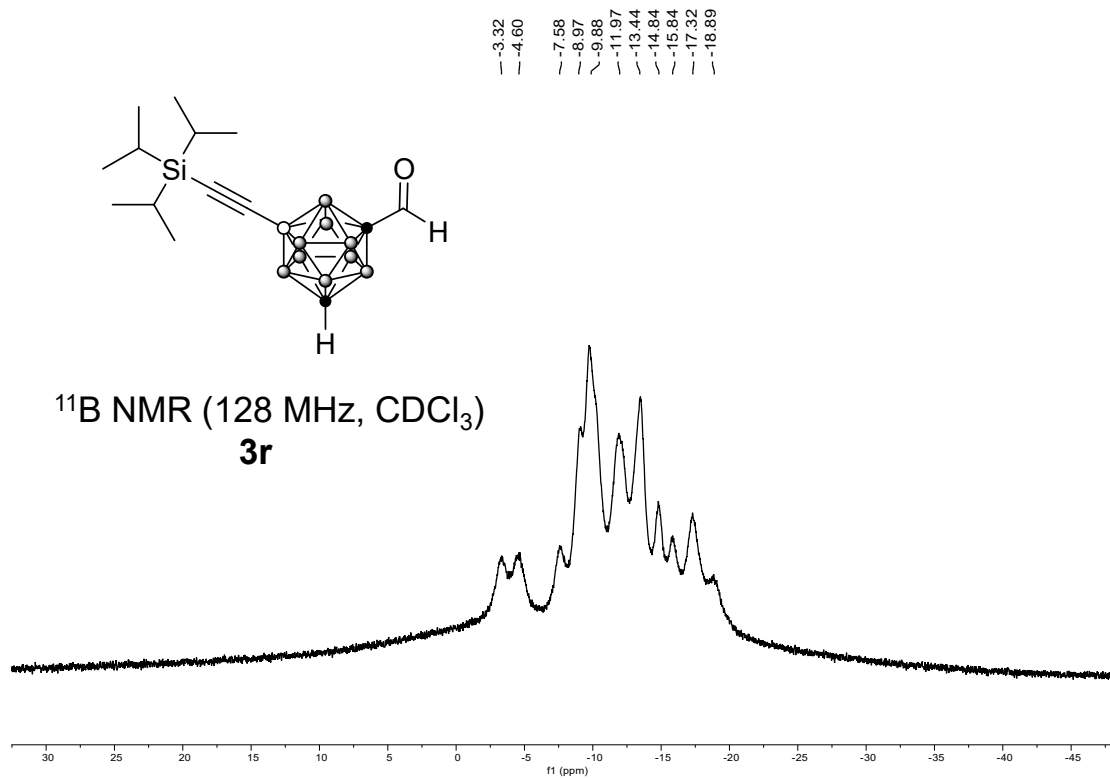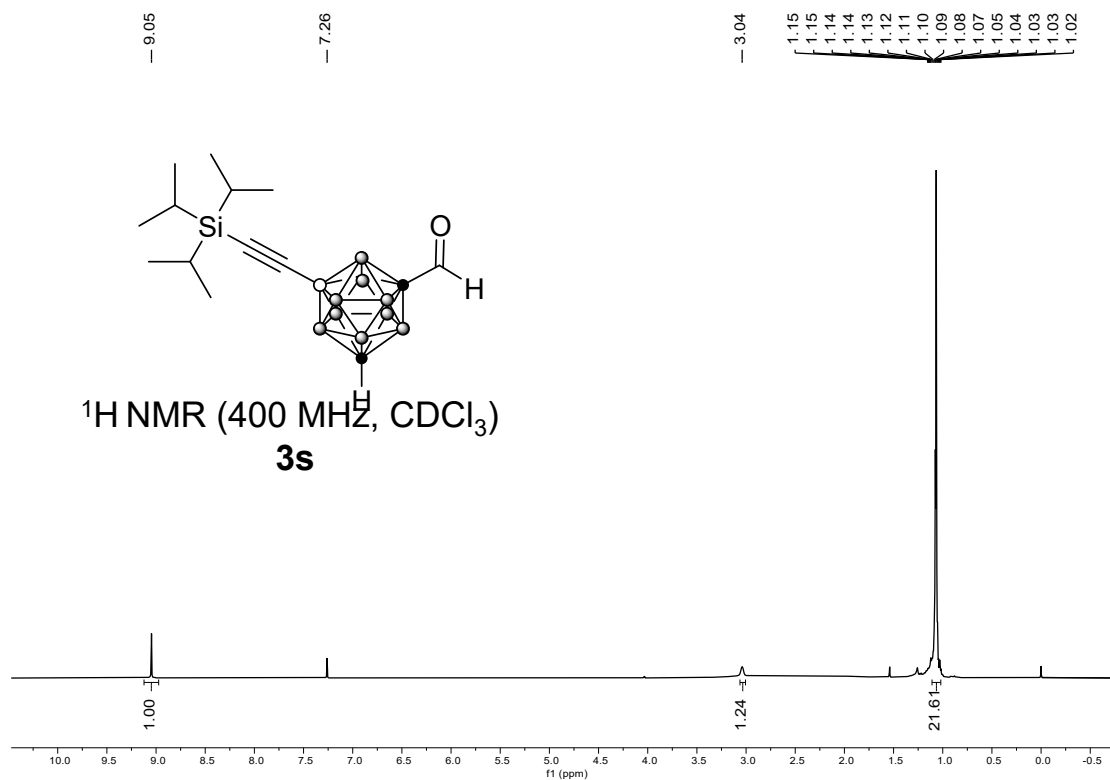

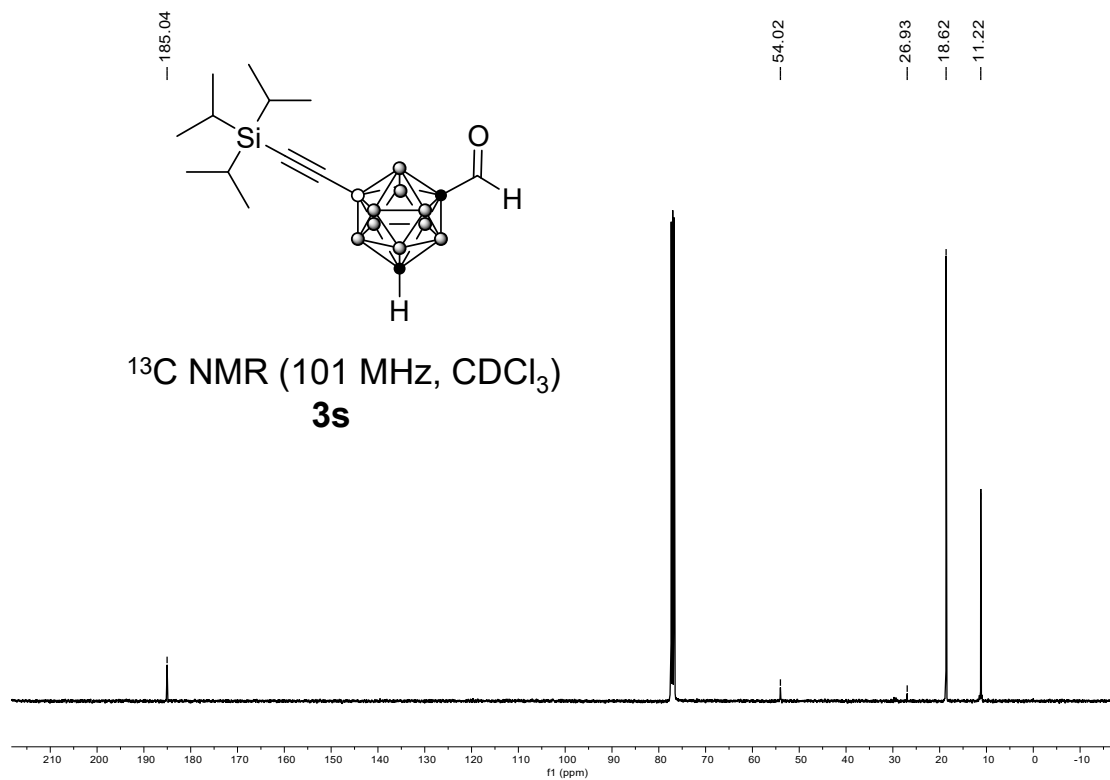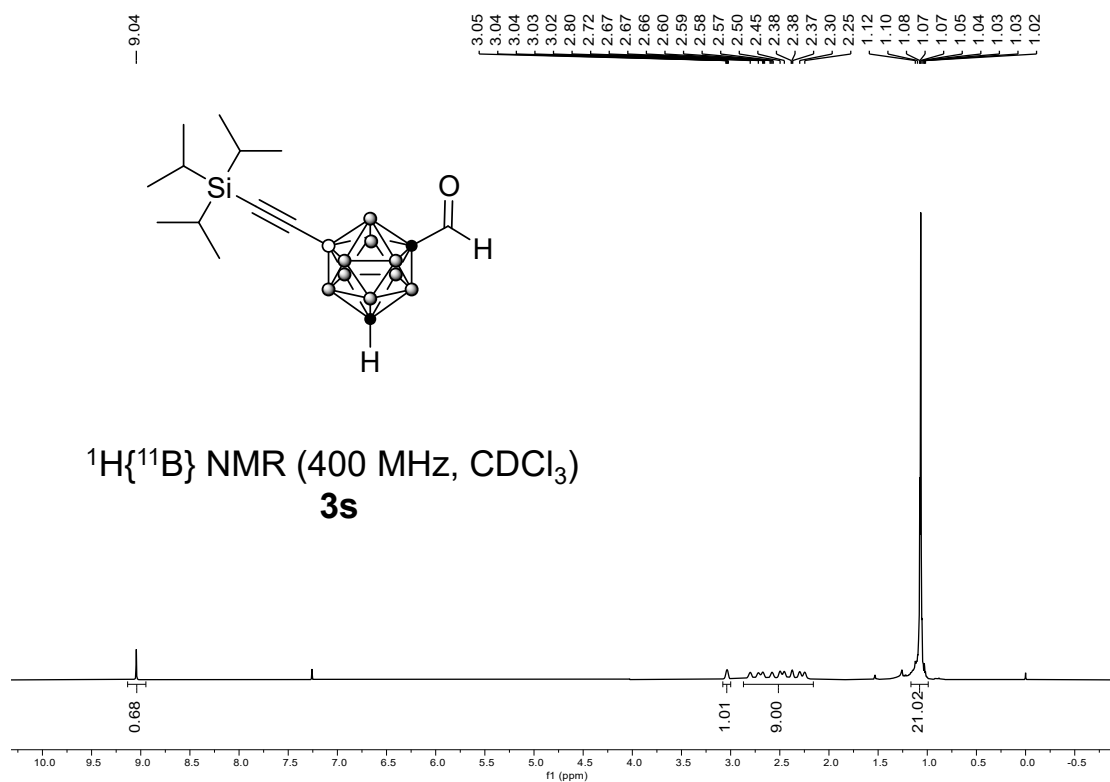



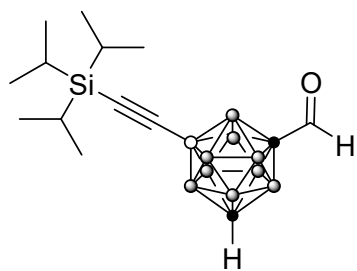

-5.77  
 -9.23  
 -12.14  
 -13.43  
 -17.13  
 -17.18  
 -18.94

$^{11}\text{B}\{^1\text{H}\}$  NMR (128 MHz,  $\text{CDCl}_3$ )  
**3s**

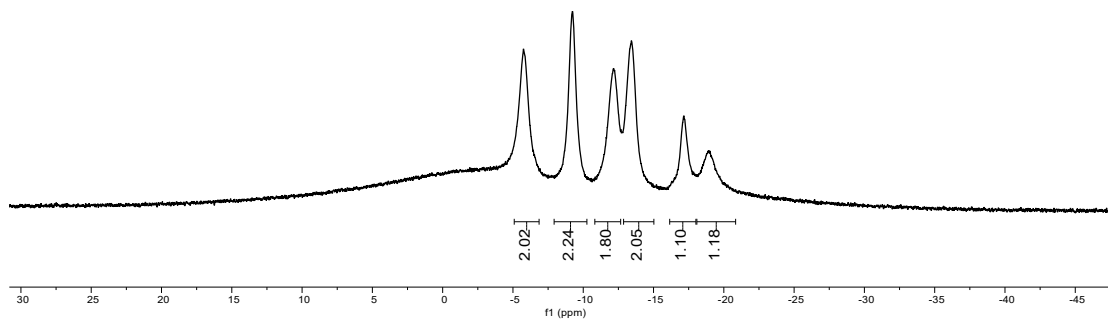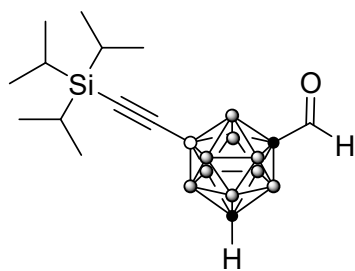

-5.16  
 -6.45  
 -8.67  
 -9.23  
 -9.89  
 -11.49  
 -12.79  
 -14.09  
 -16.42  
 -17.94  
 -19.61

$^{11}\text{B}$  NMR (128 MHz,  $\text{CDCl}_3$ )  
**3s**

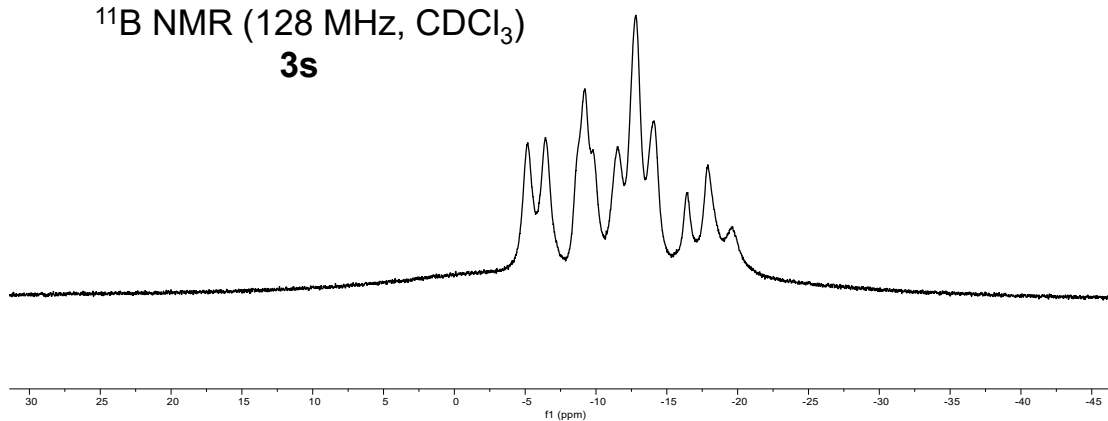

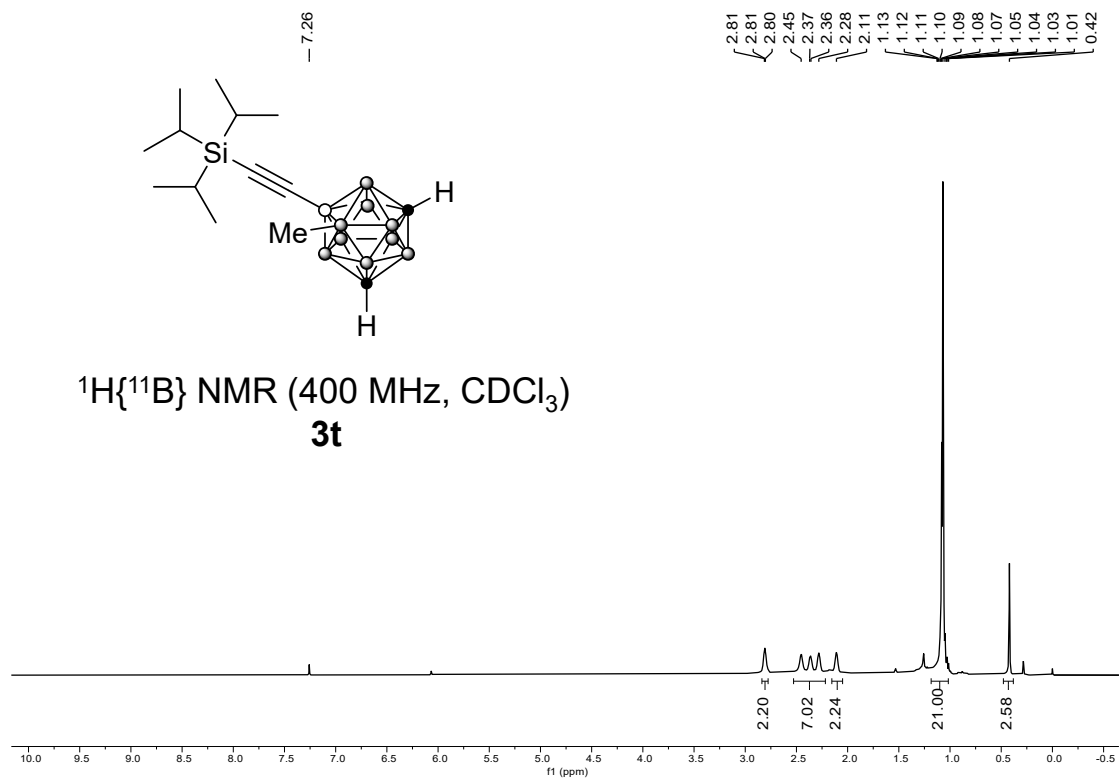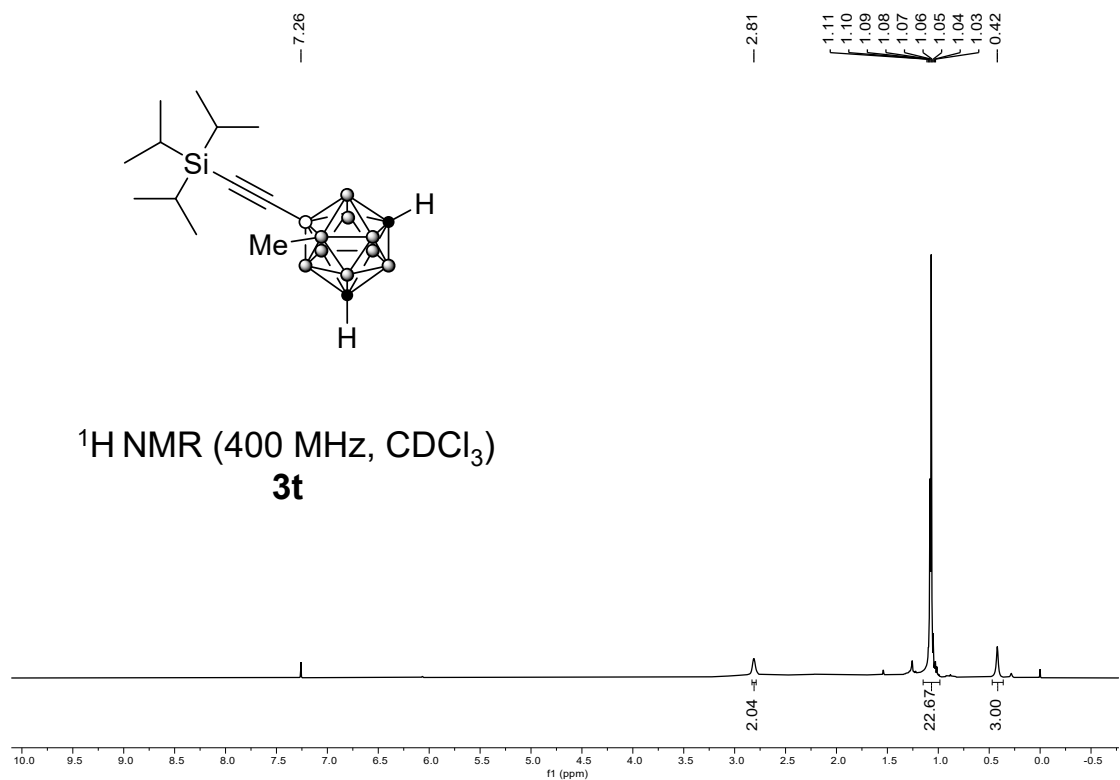

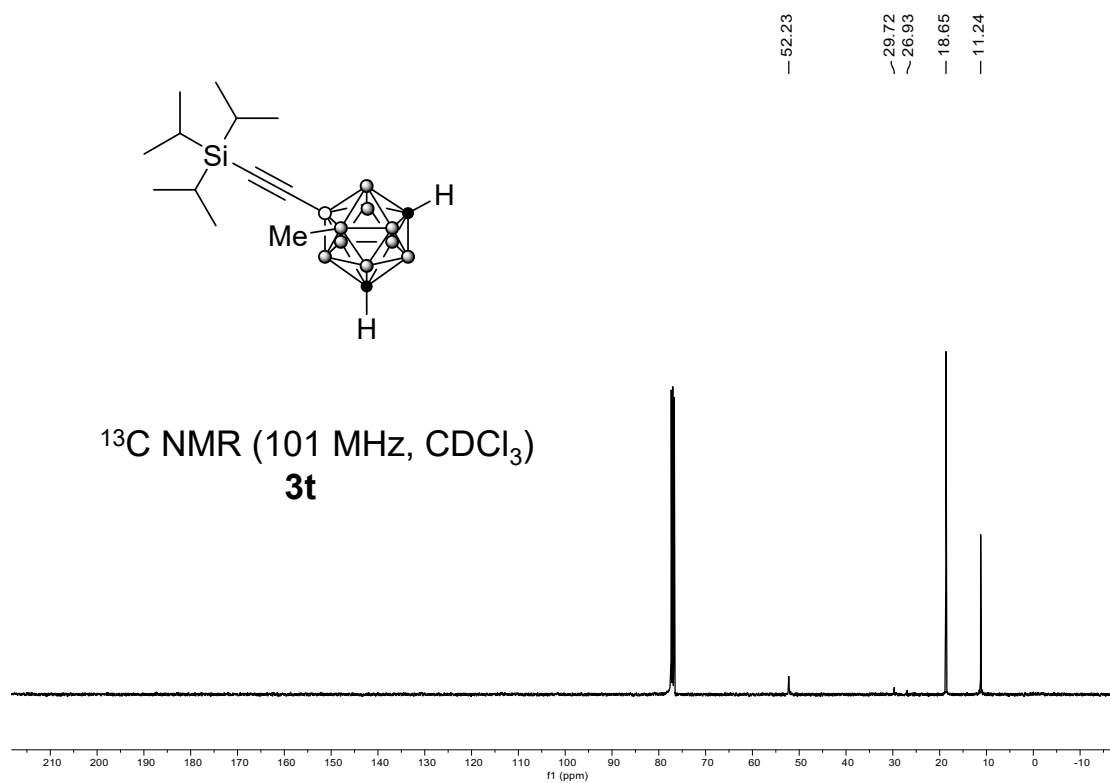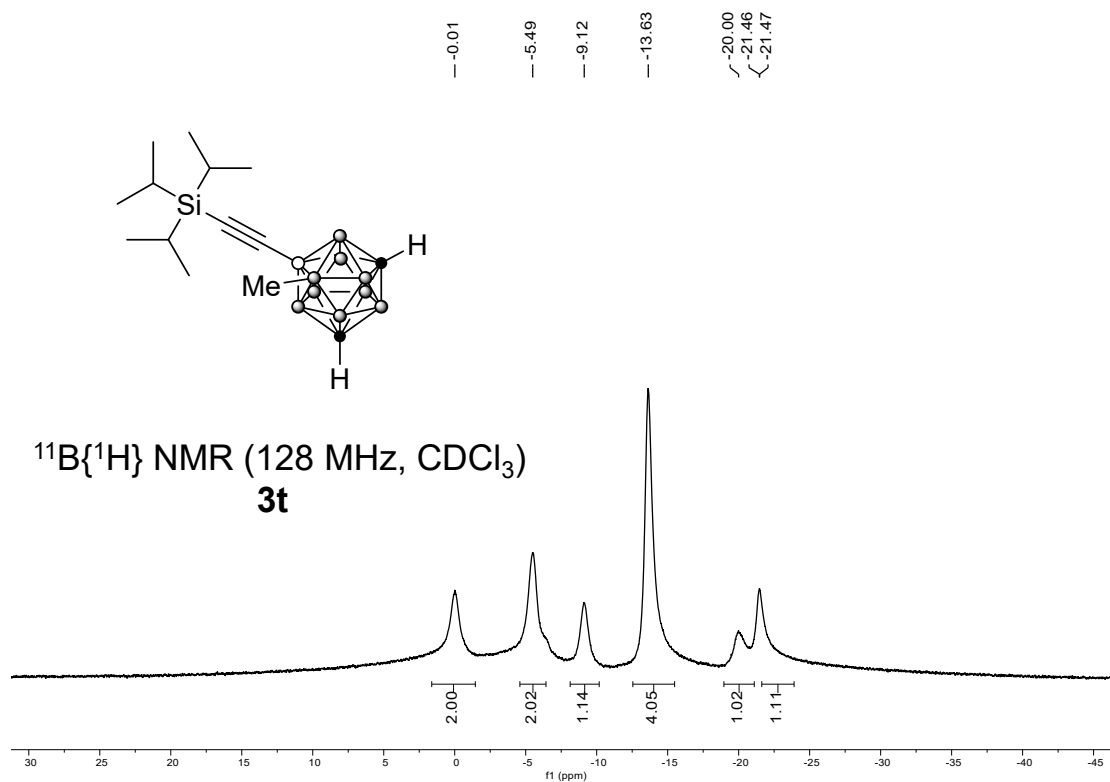

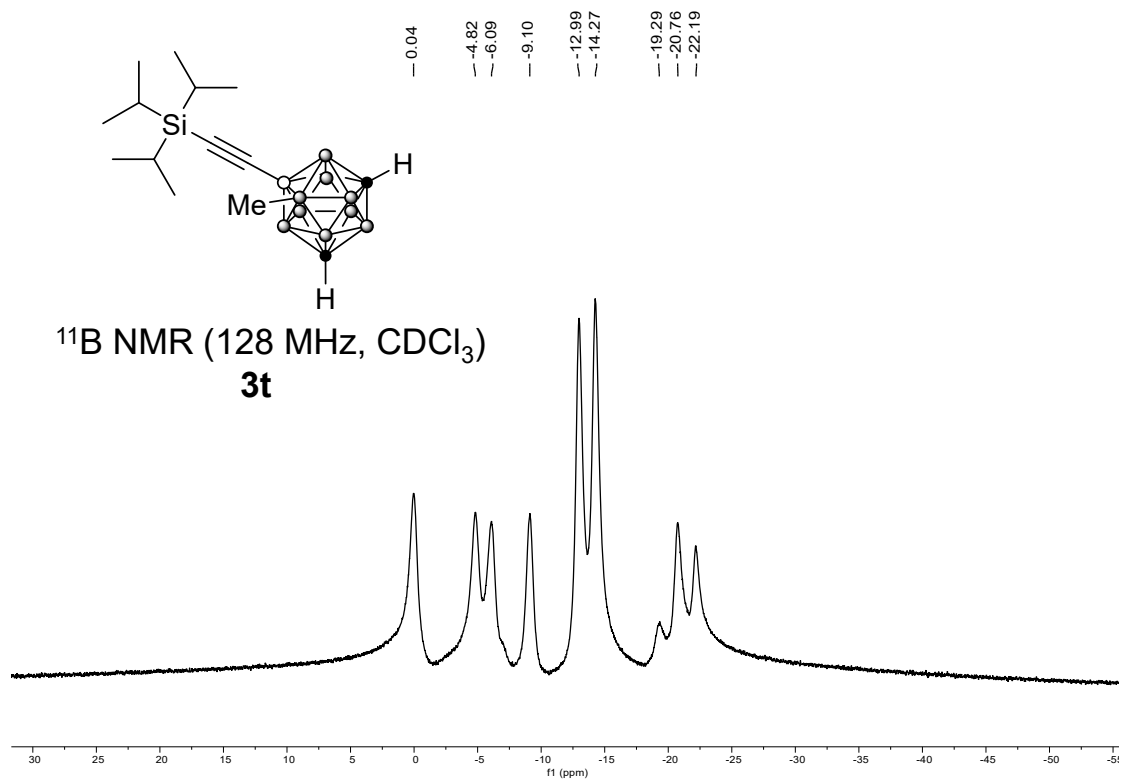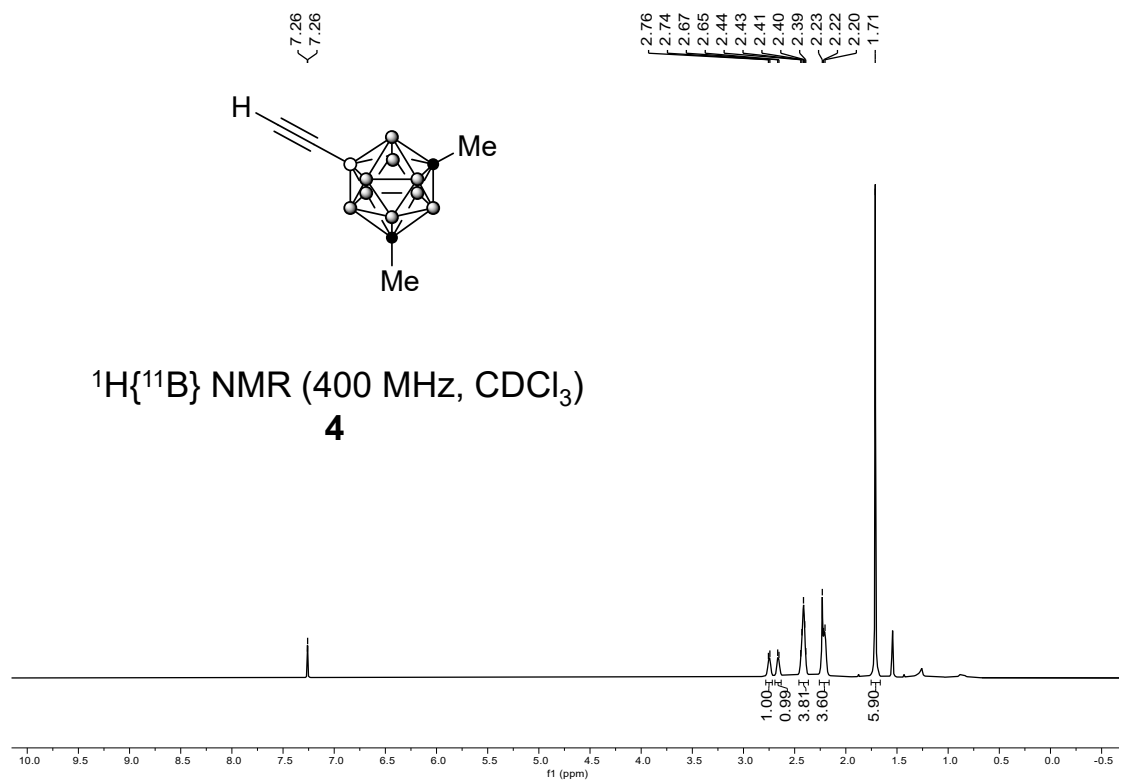

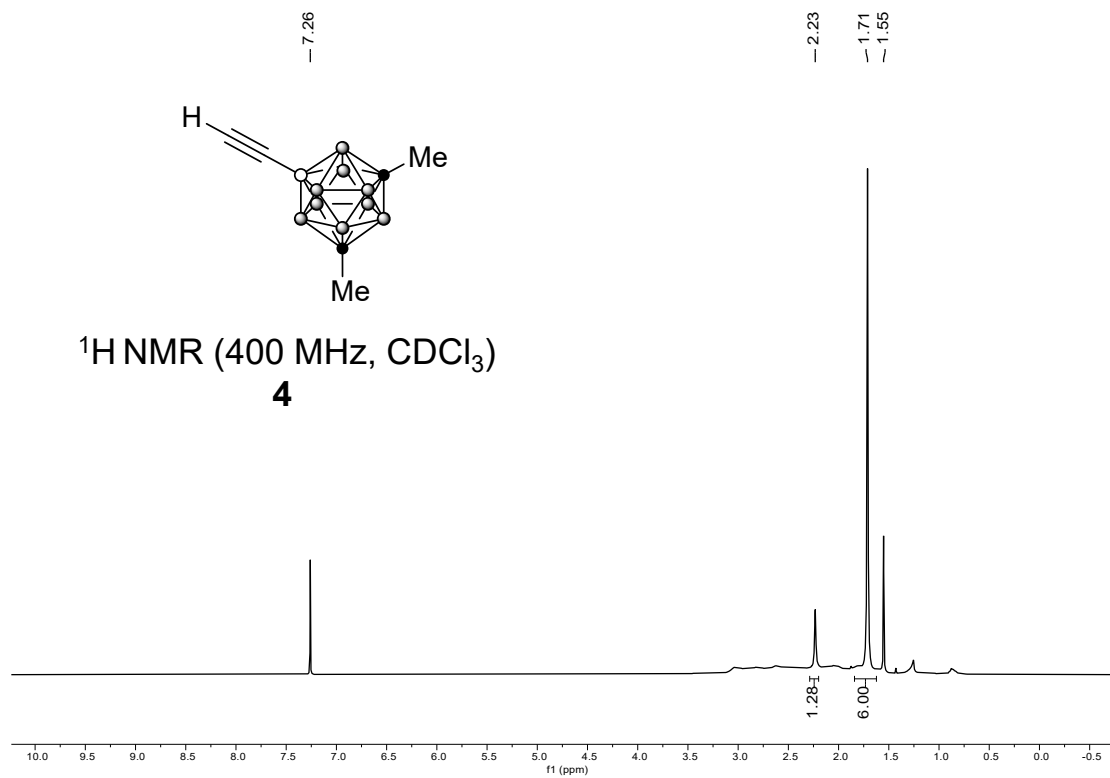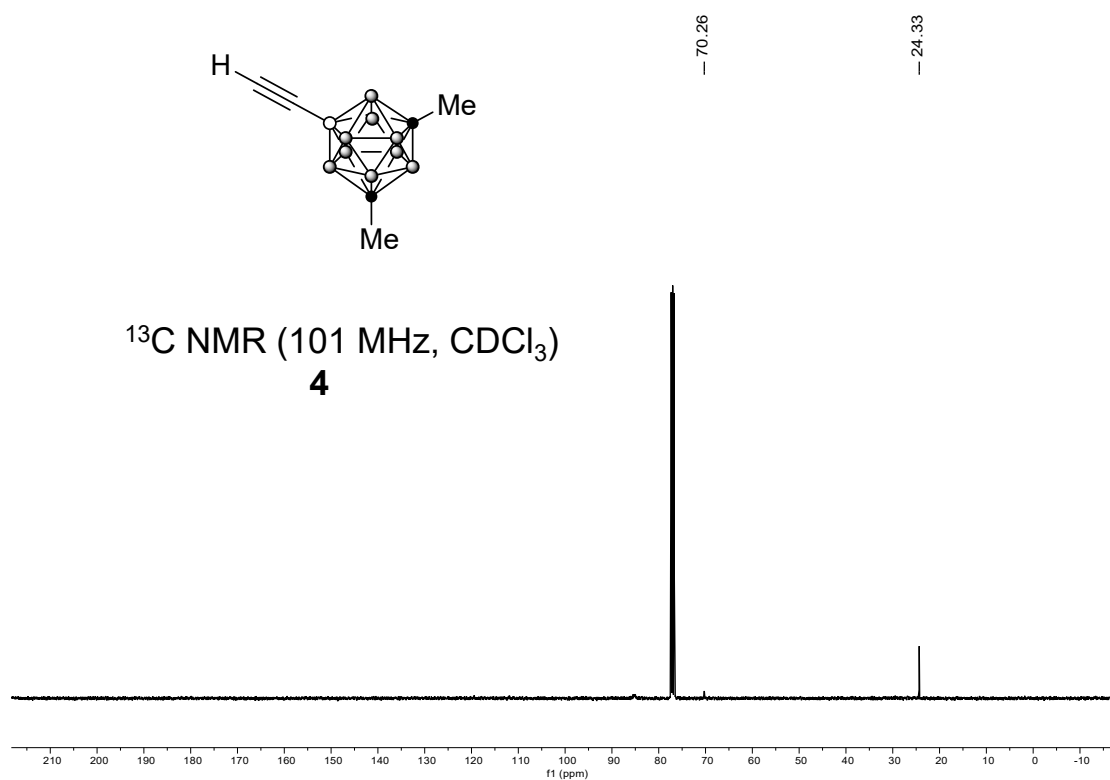

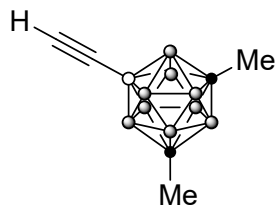

-6.82  
 -9.63  
 -10.12  
 -10.64  
 -12.75  
 -14.04

$^{11}\text{B}\{^1\text{H}\}$  NMR (128 MHz,  $\text{CDCl}_3$ )

**4**

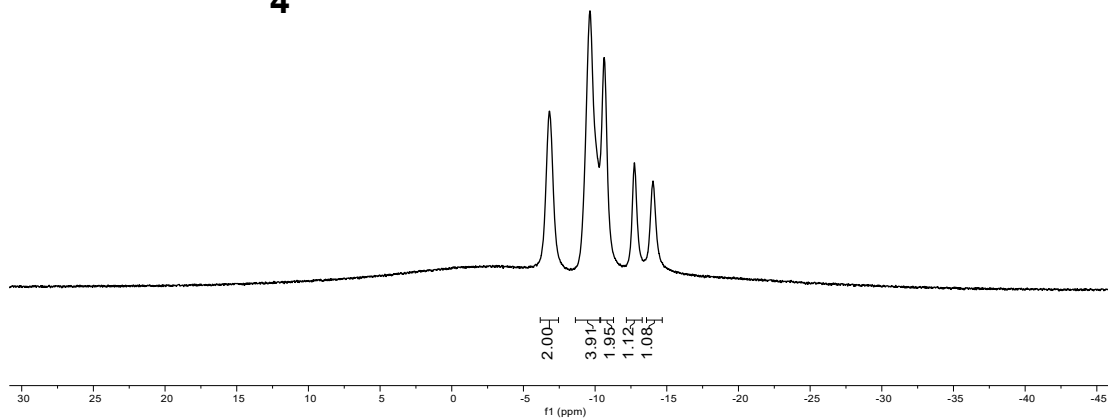

-6.18  
 -7.46  
 -8.92  
 -10.10  
 -11.28  
 -12.04  
 -13.40  
 -14.72

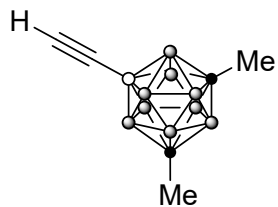

$^{11}\text{B}$  NMR (128 MHz,  $\text{CDCl}_3$ )

**4**

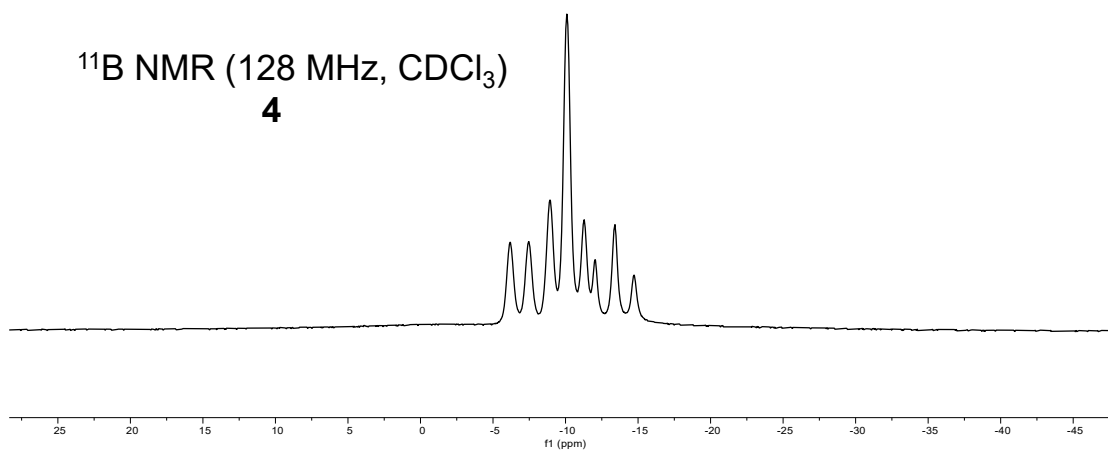

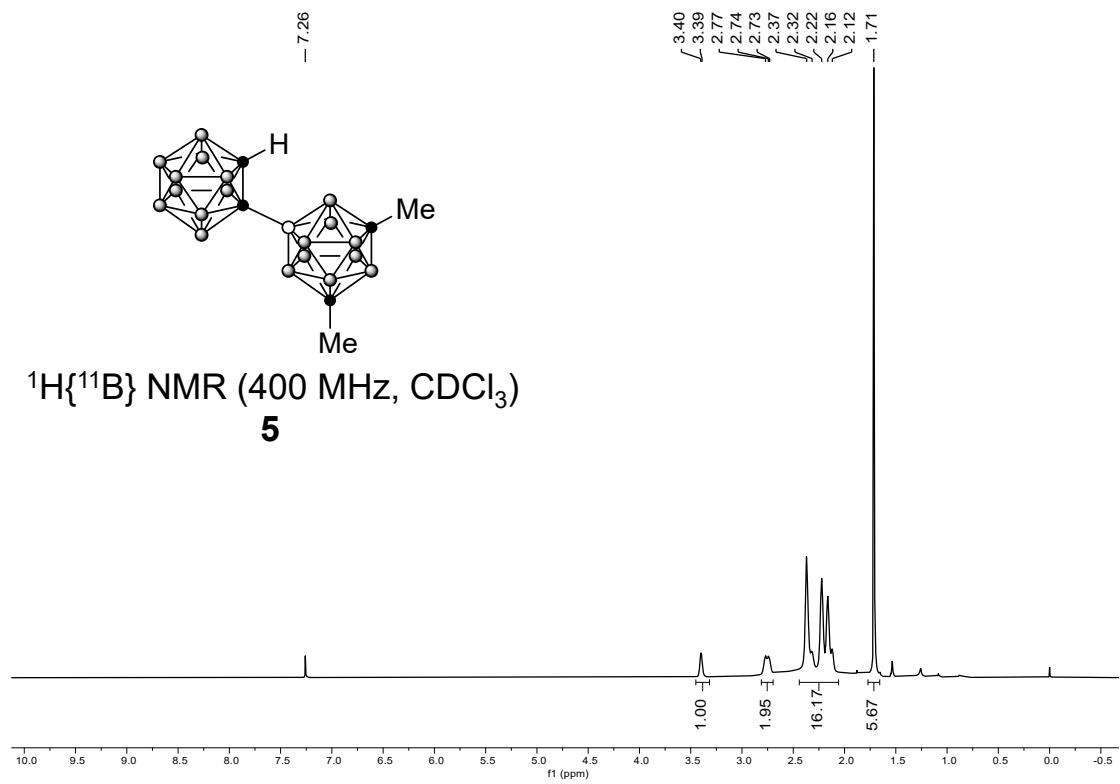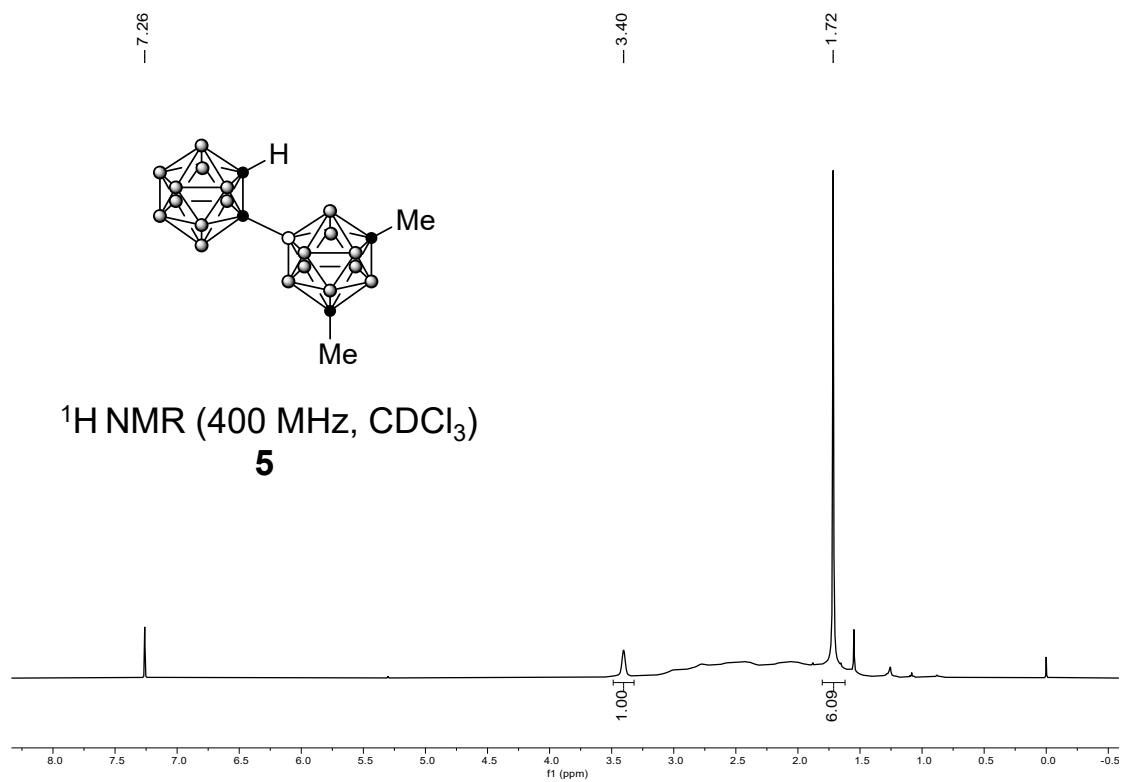

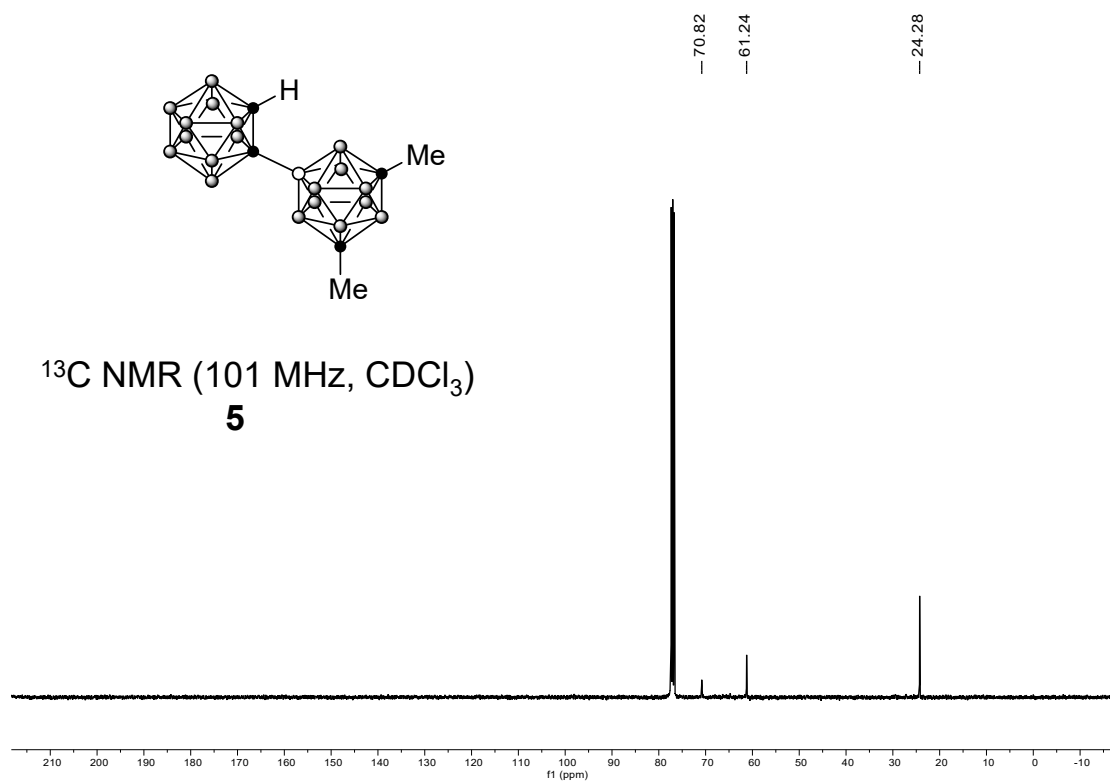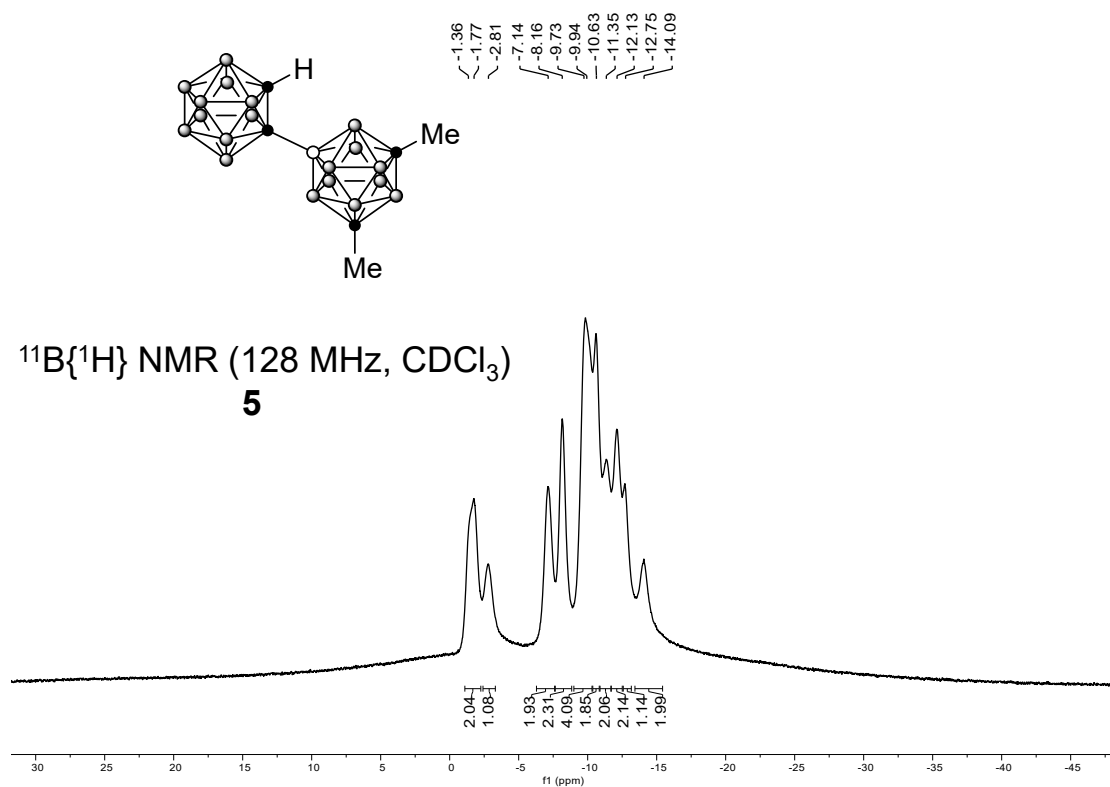



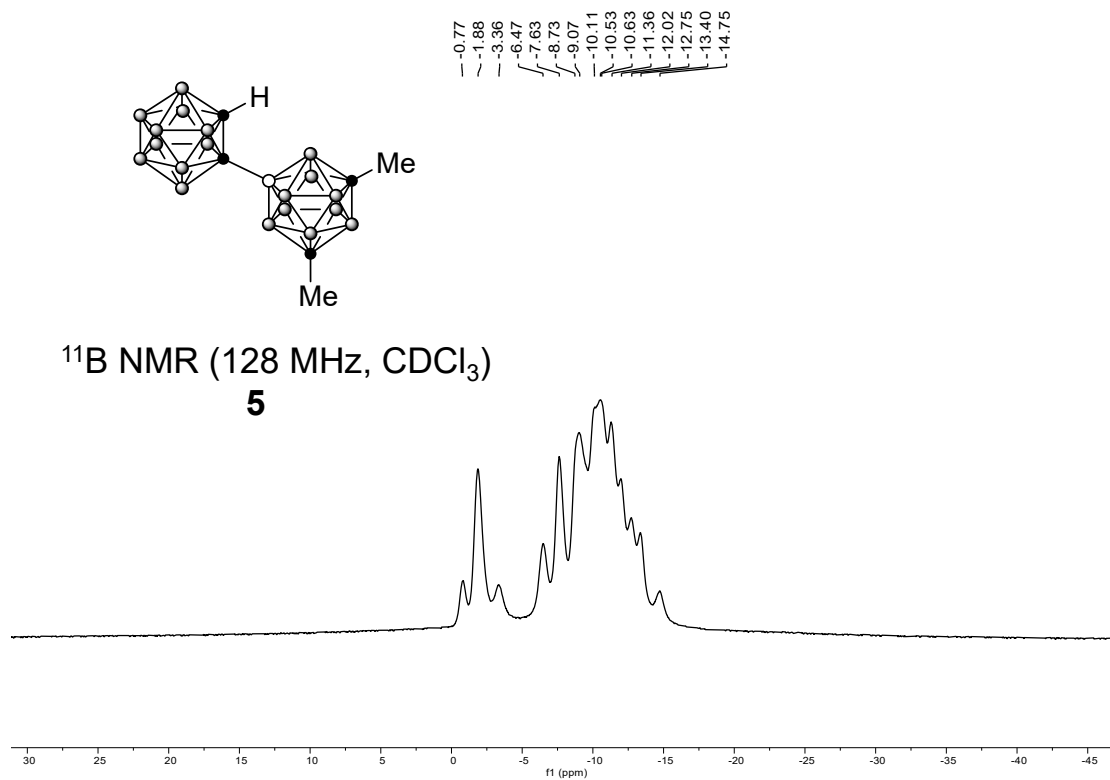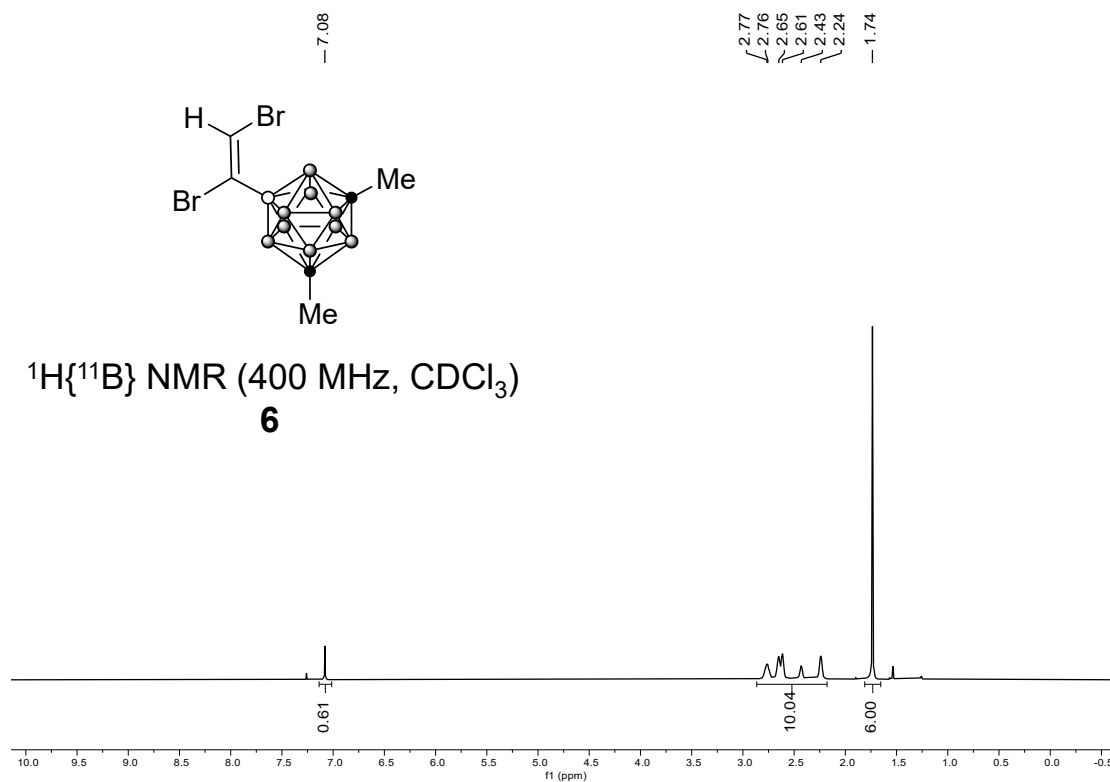

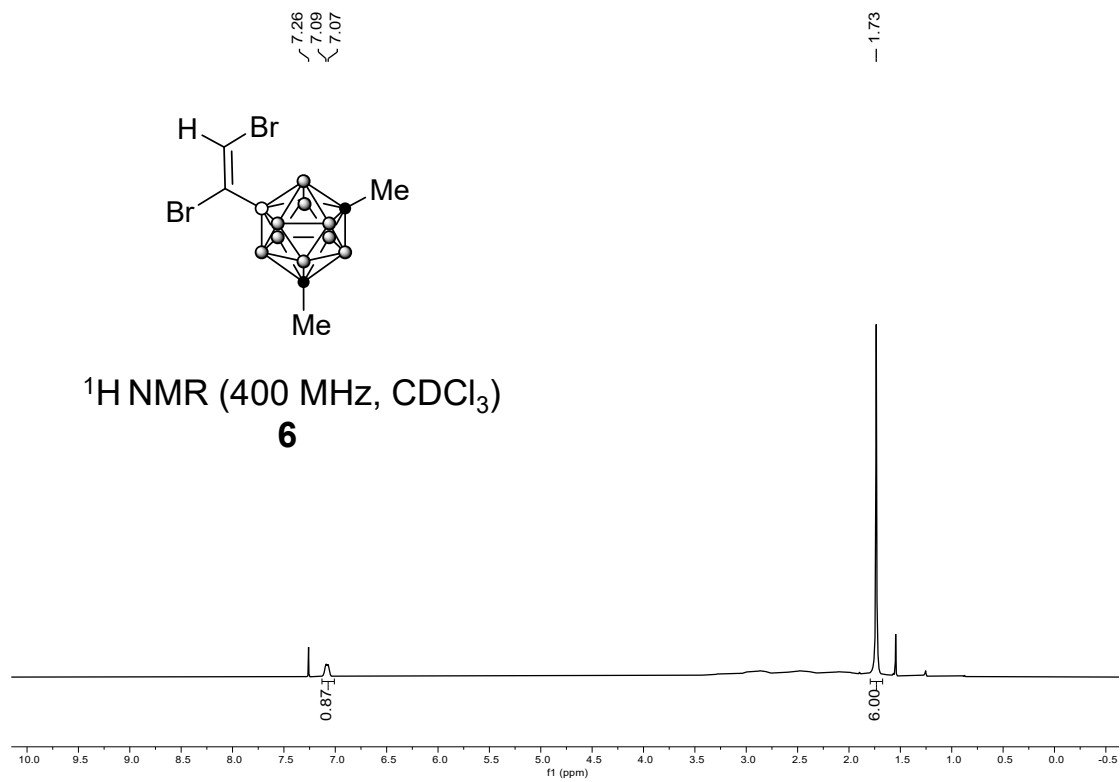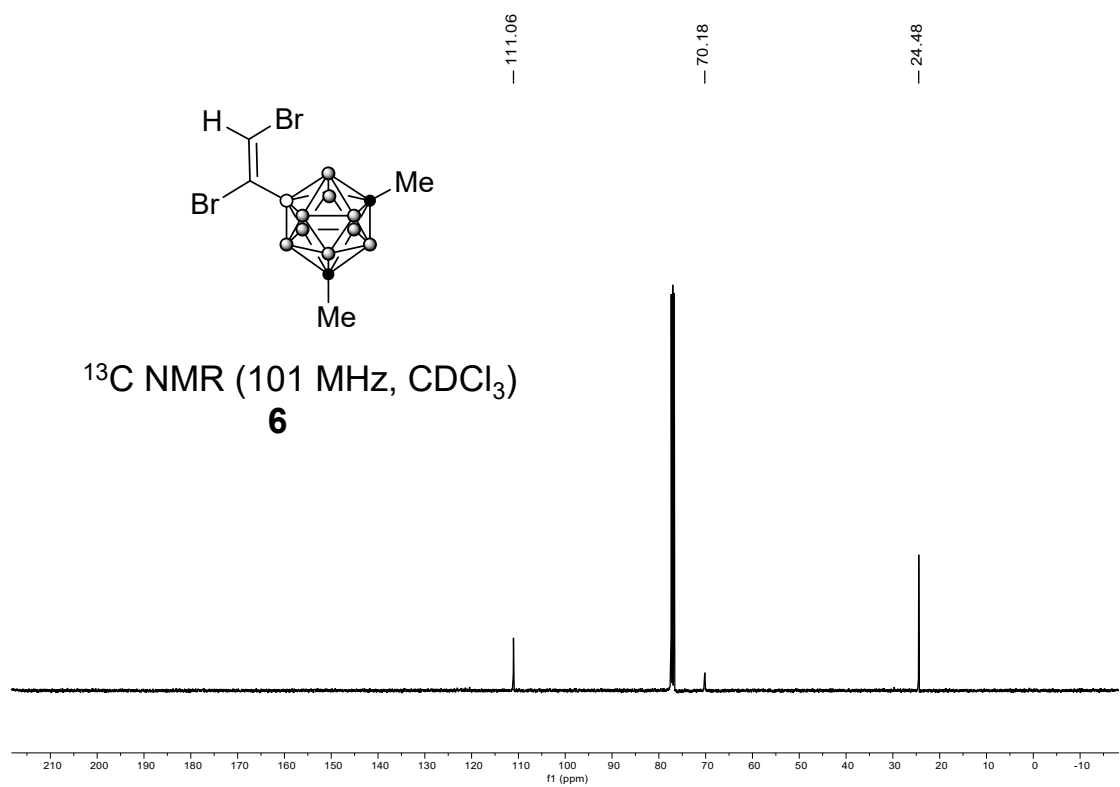

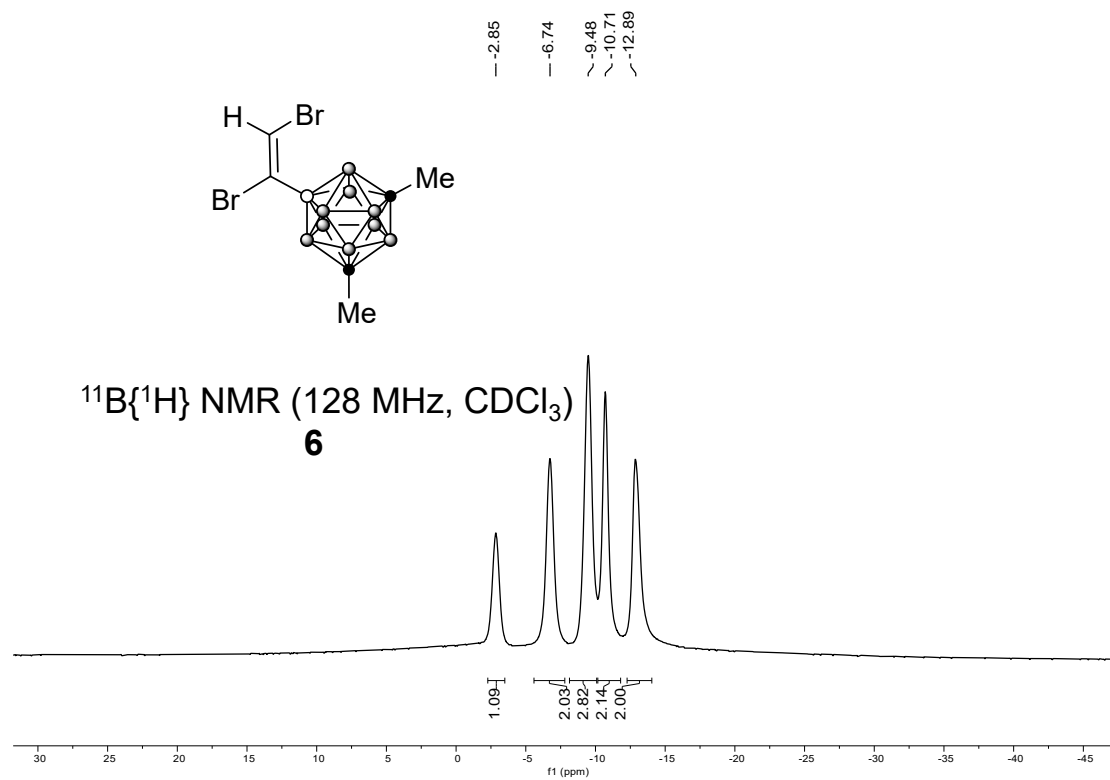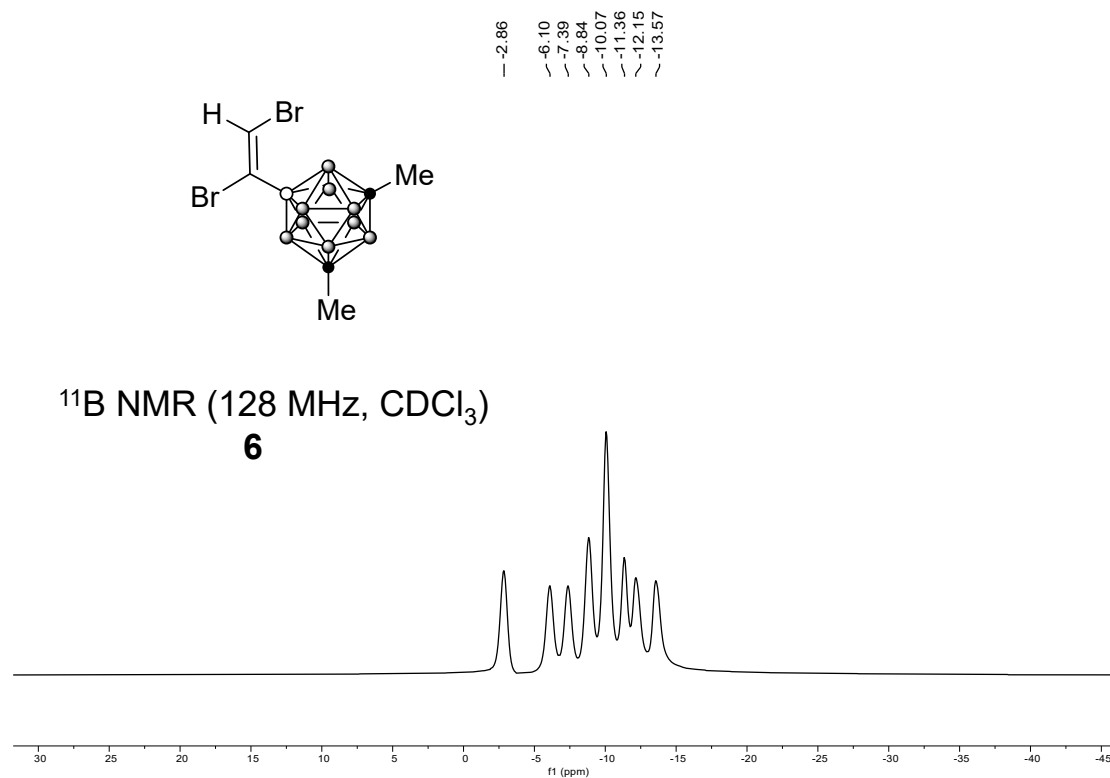

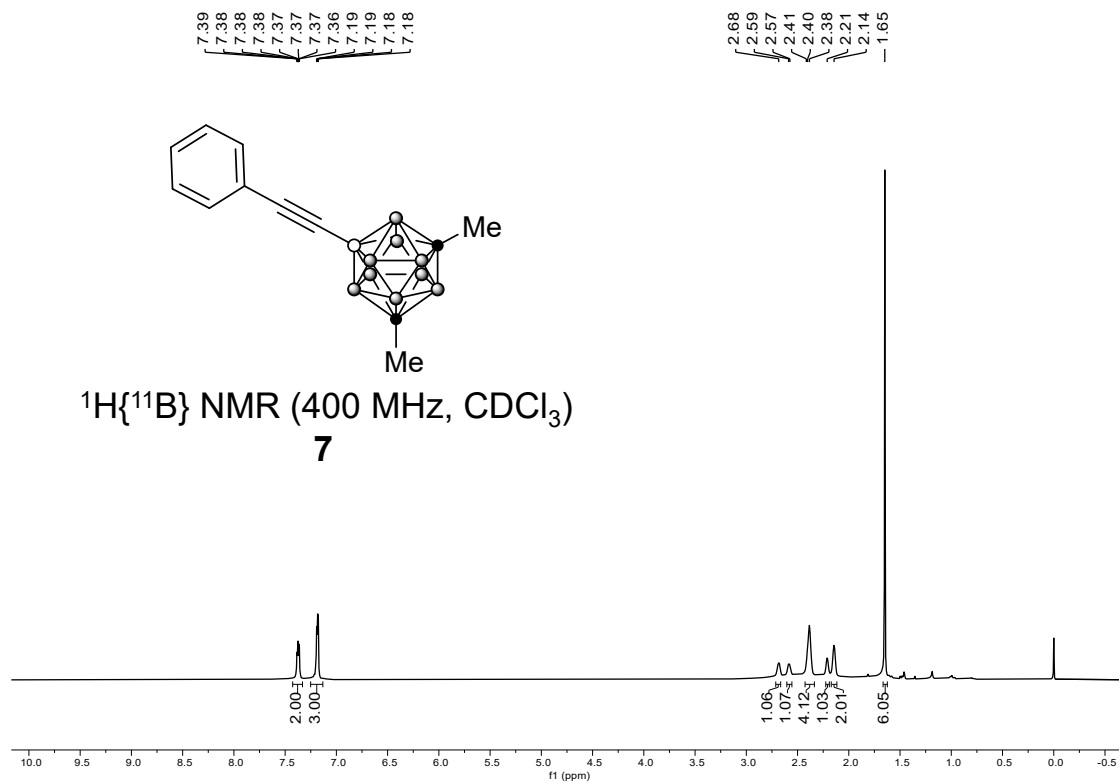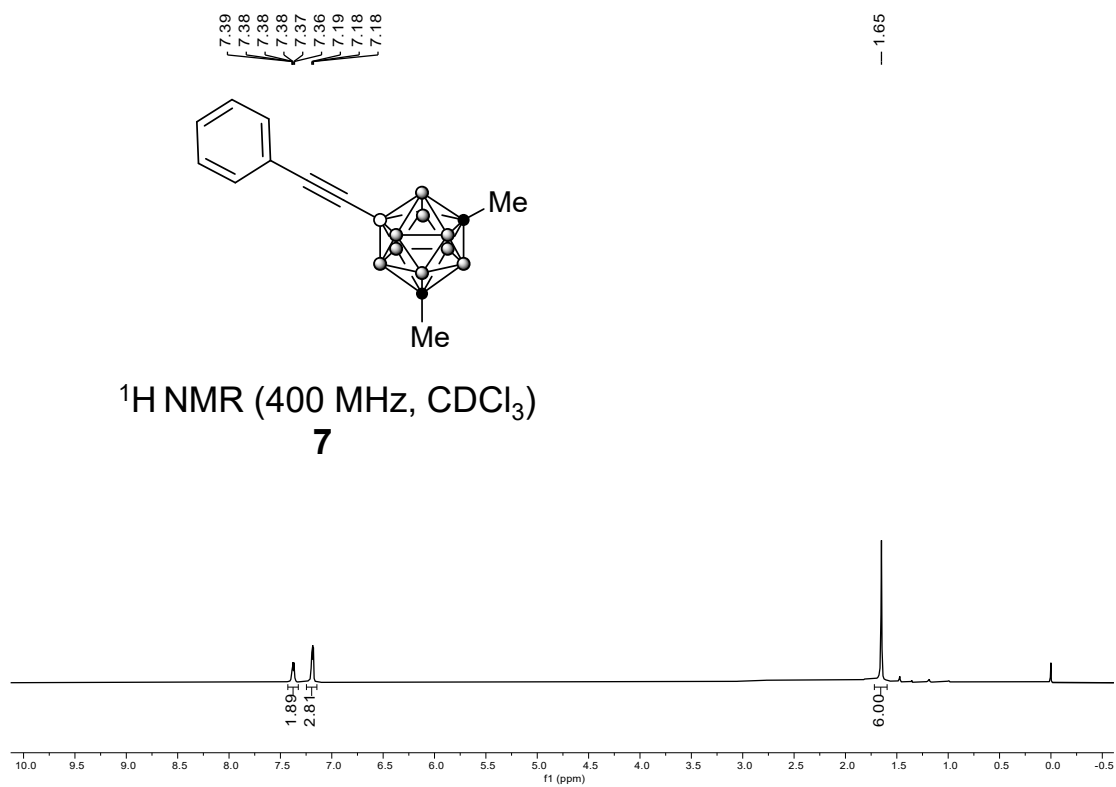

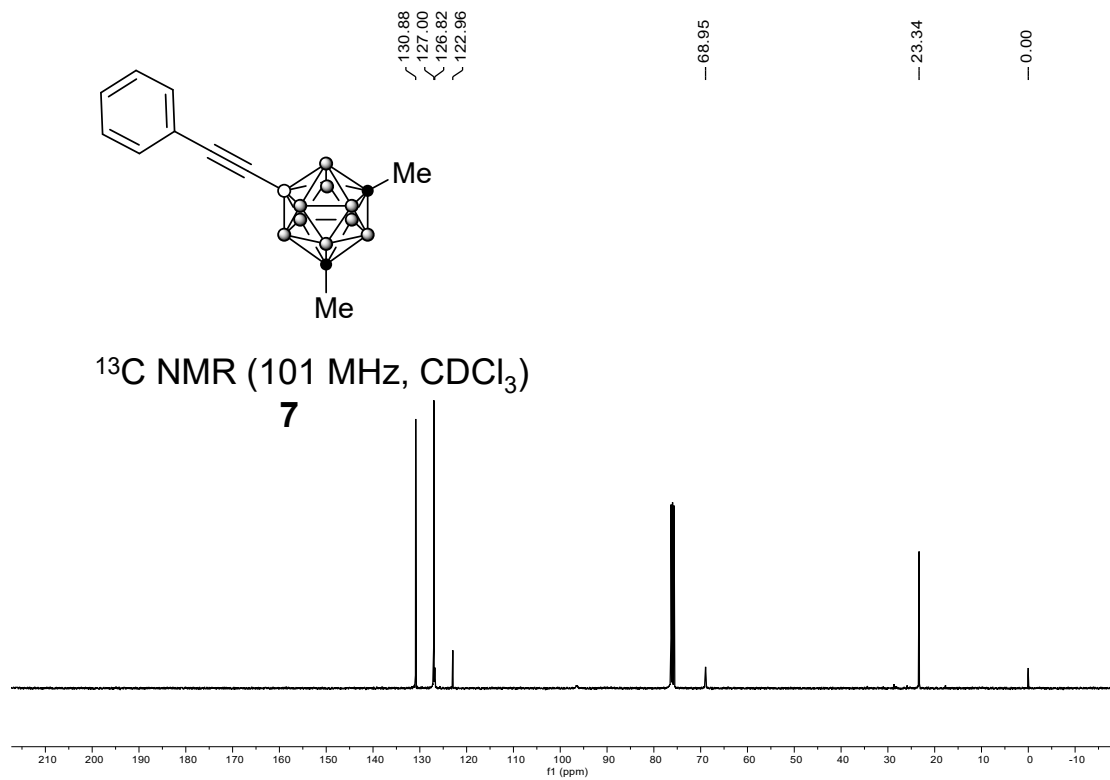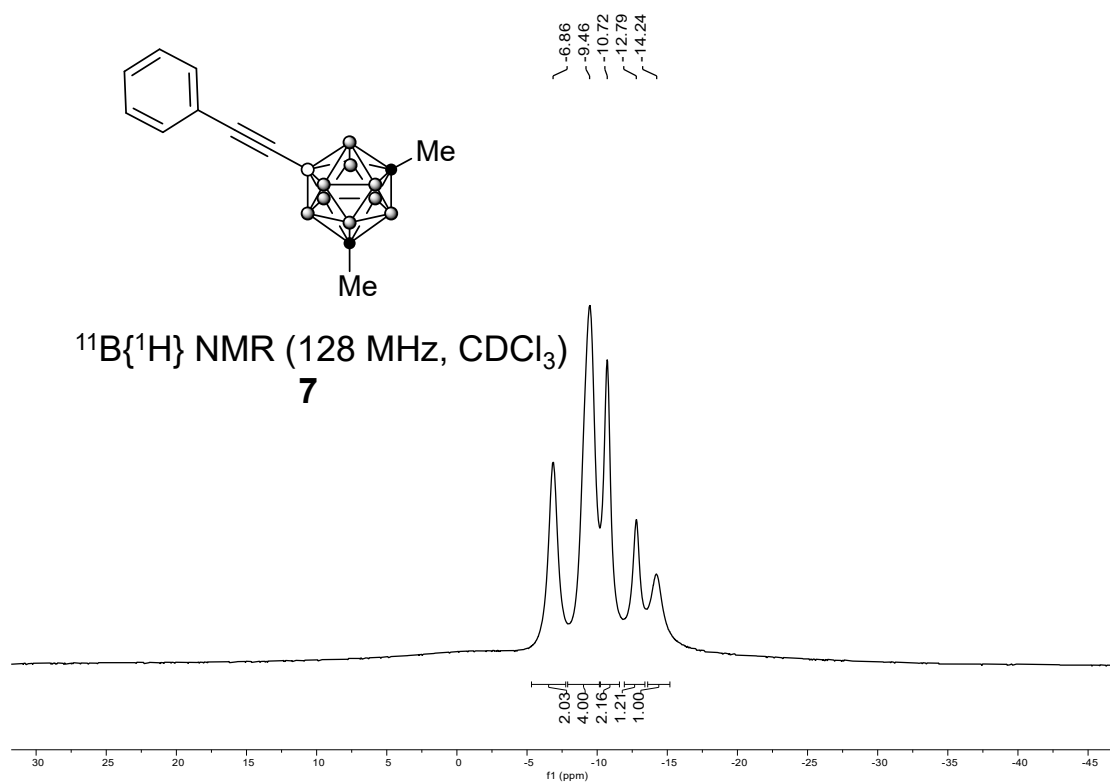

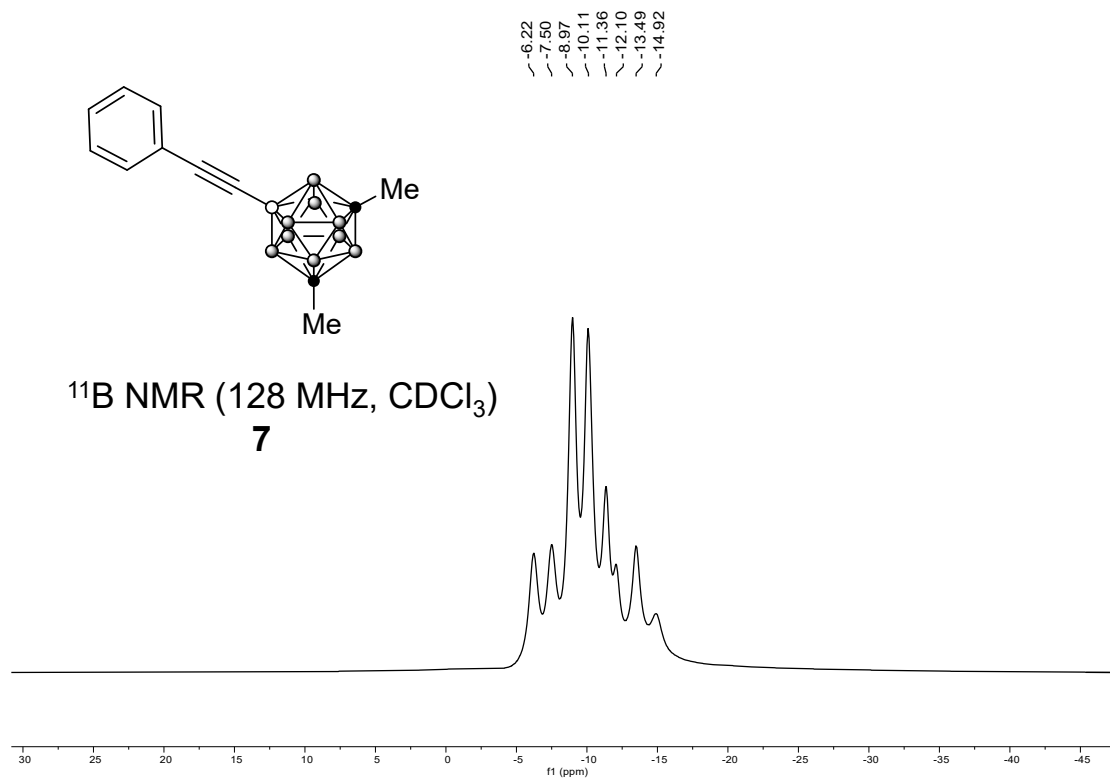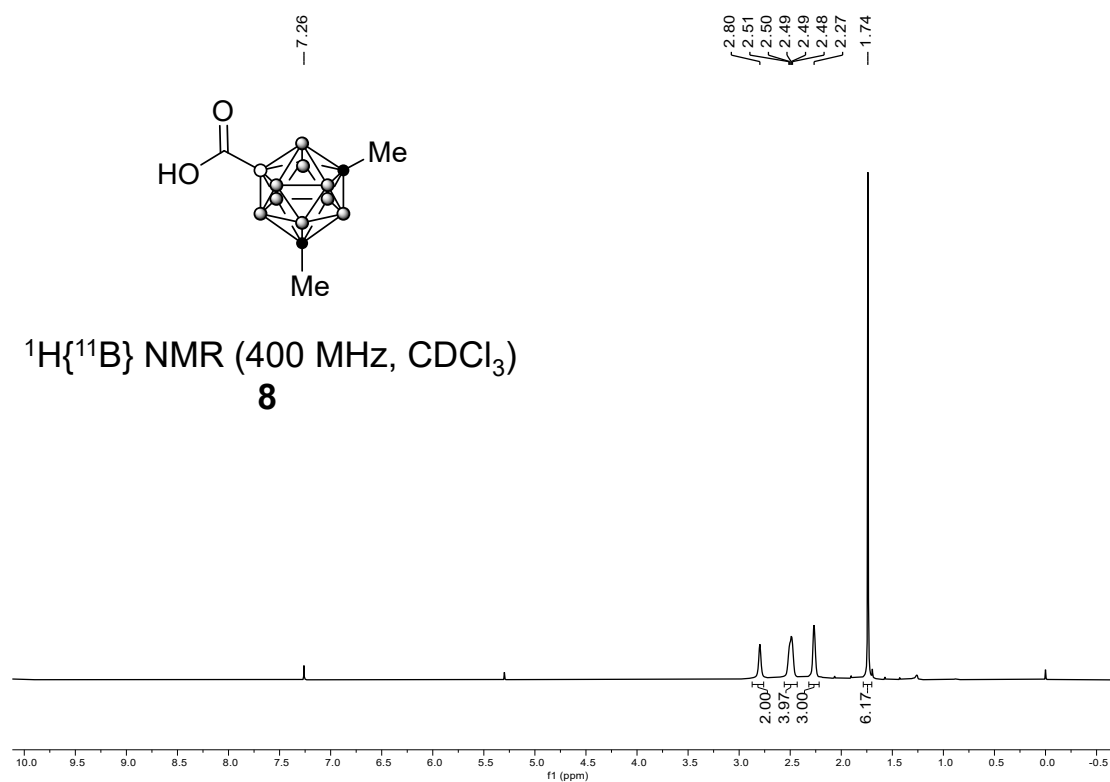

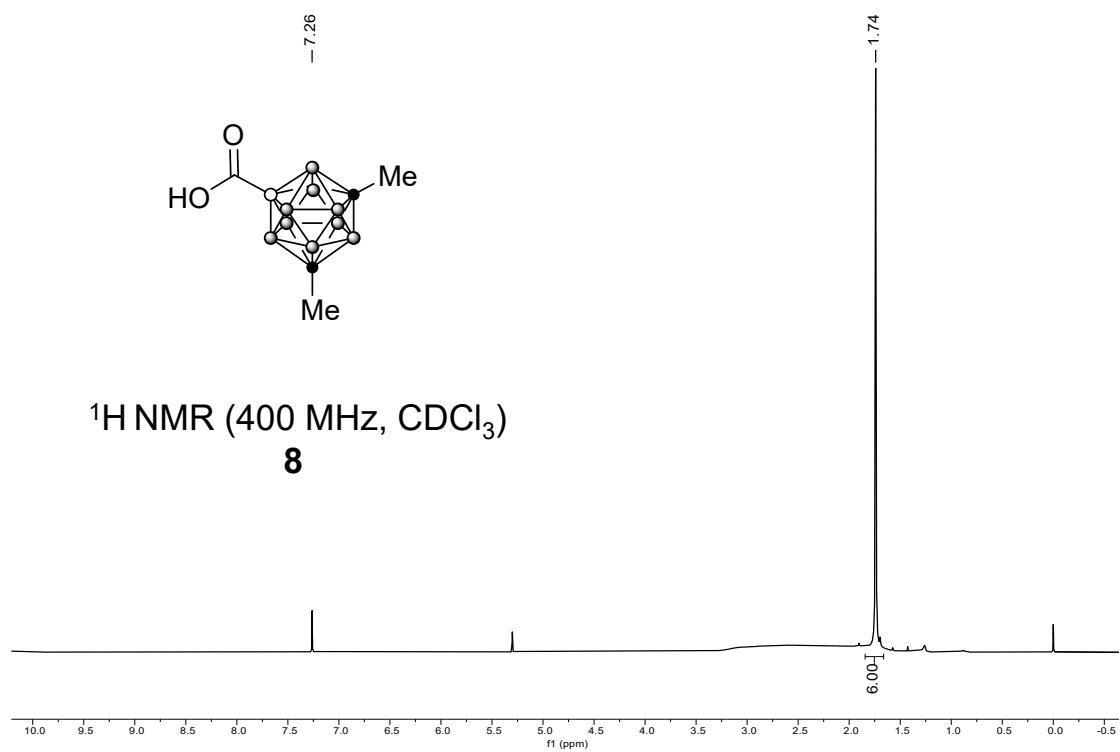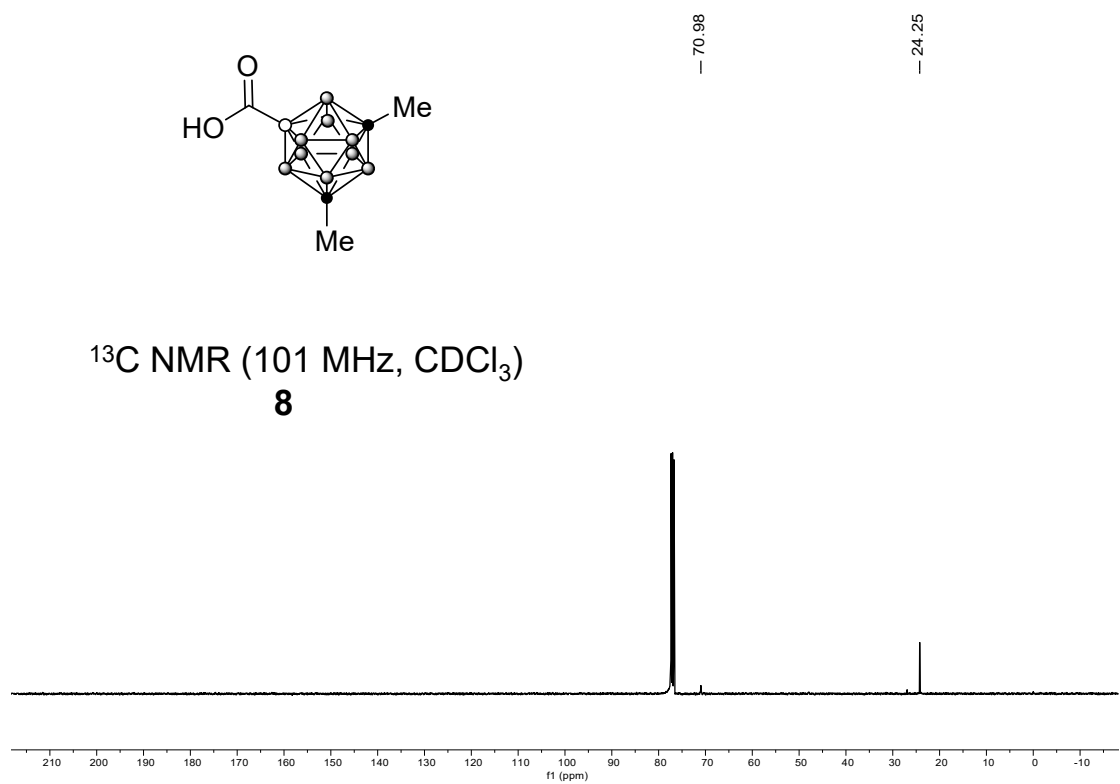

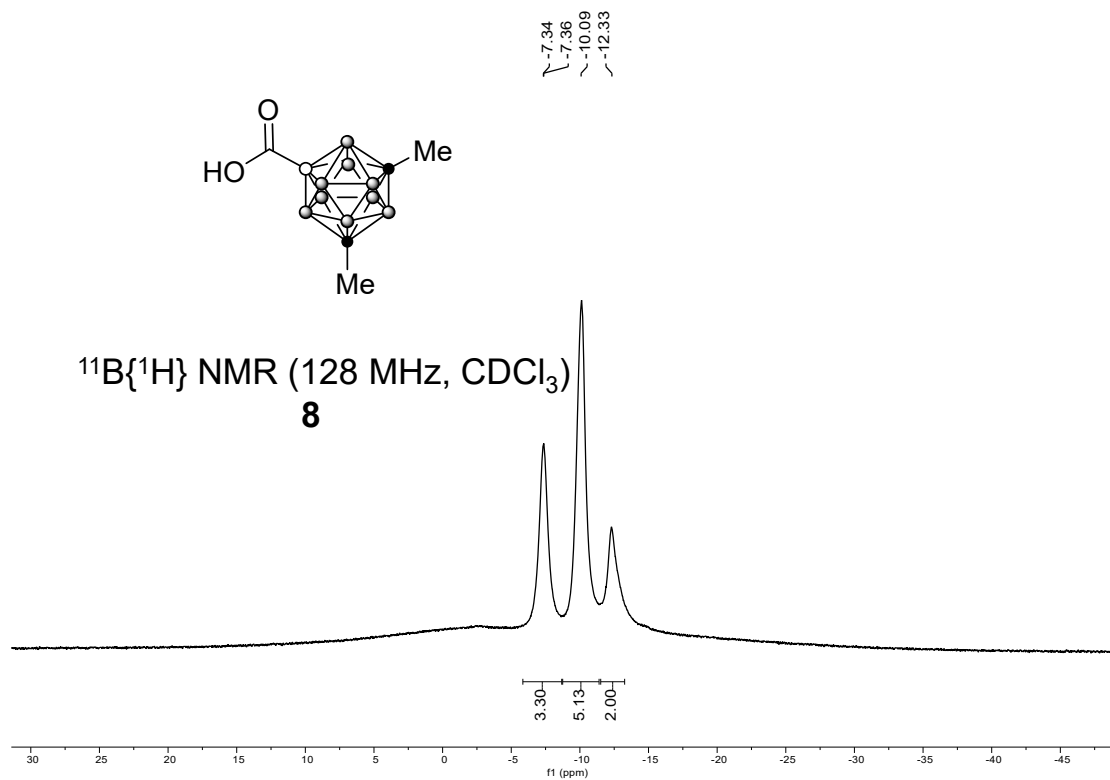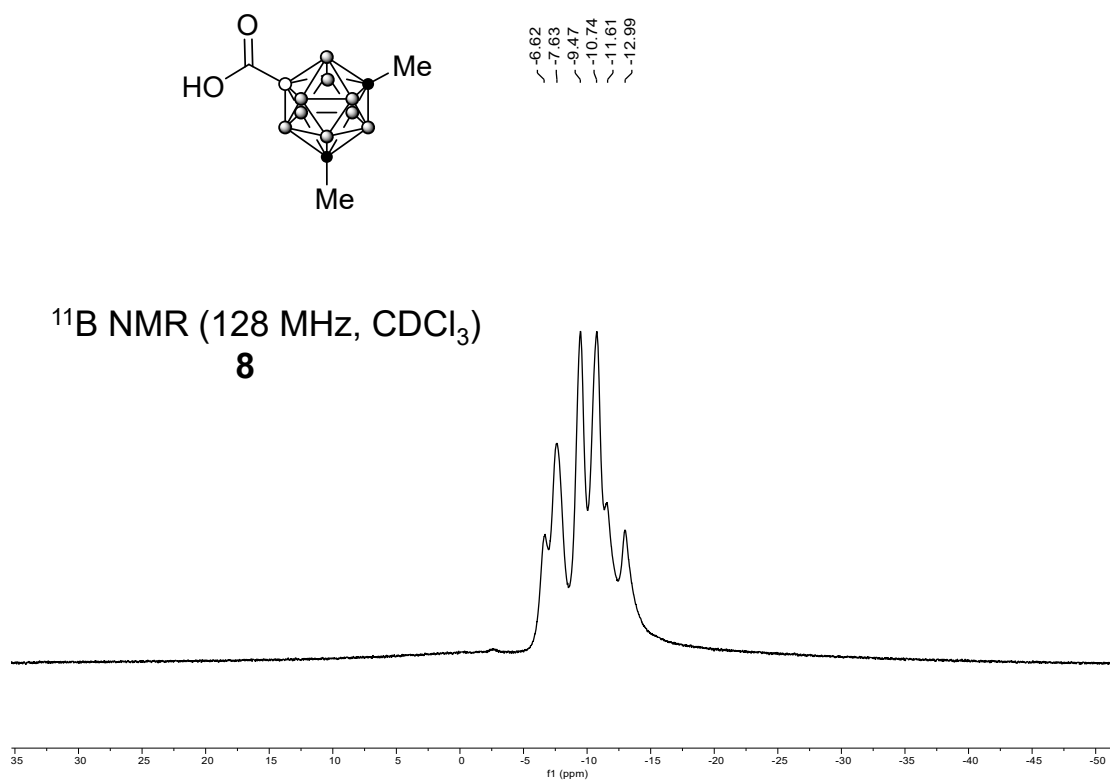



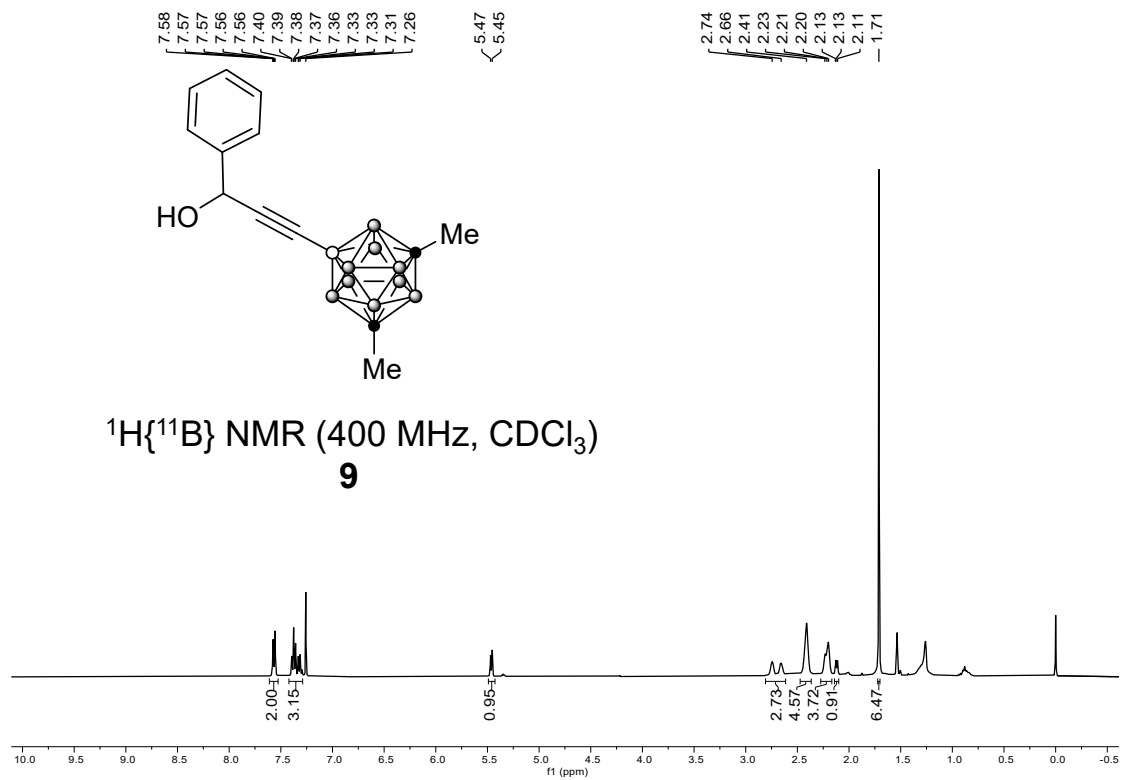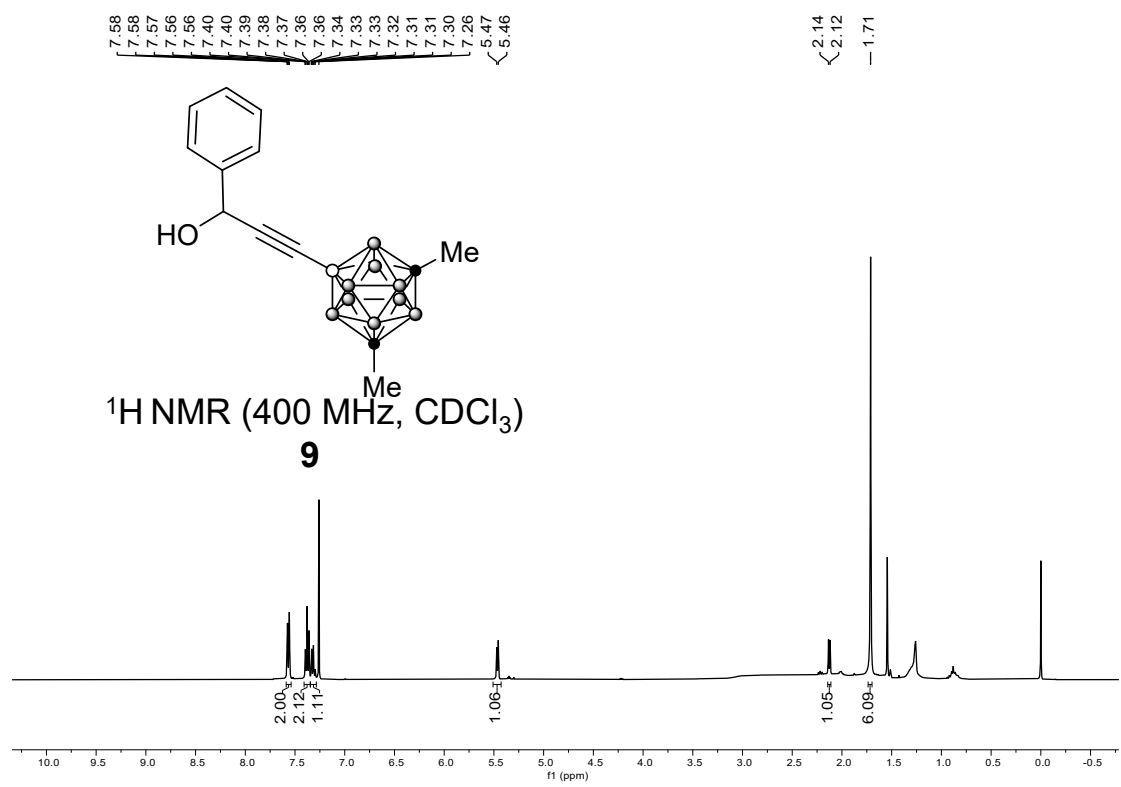

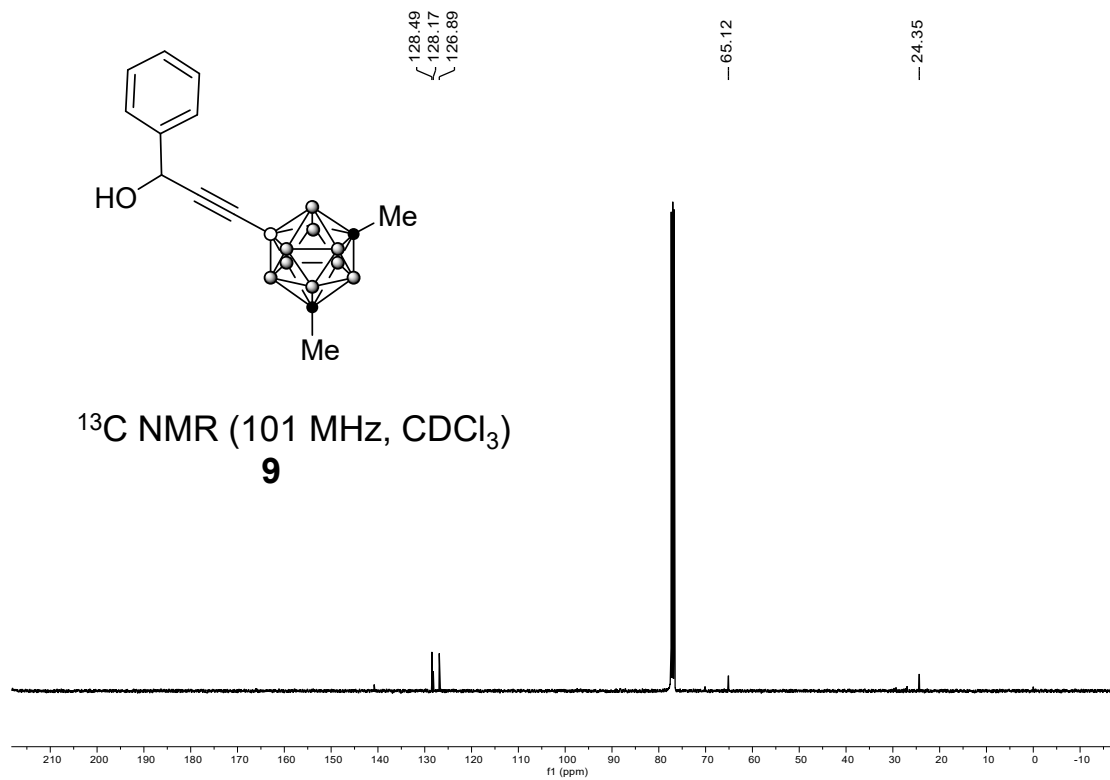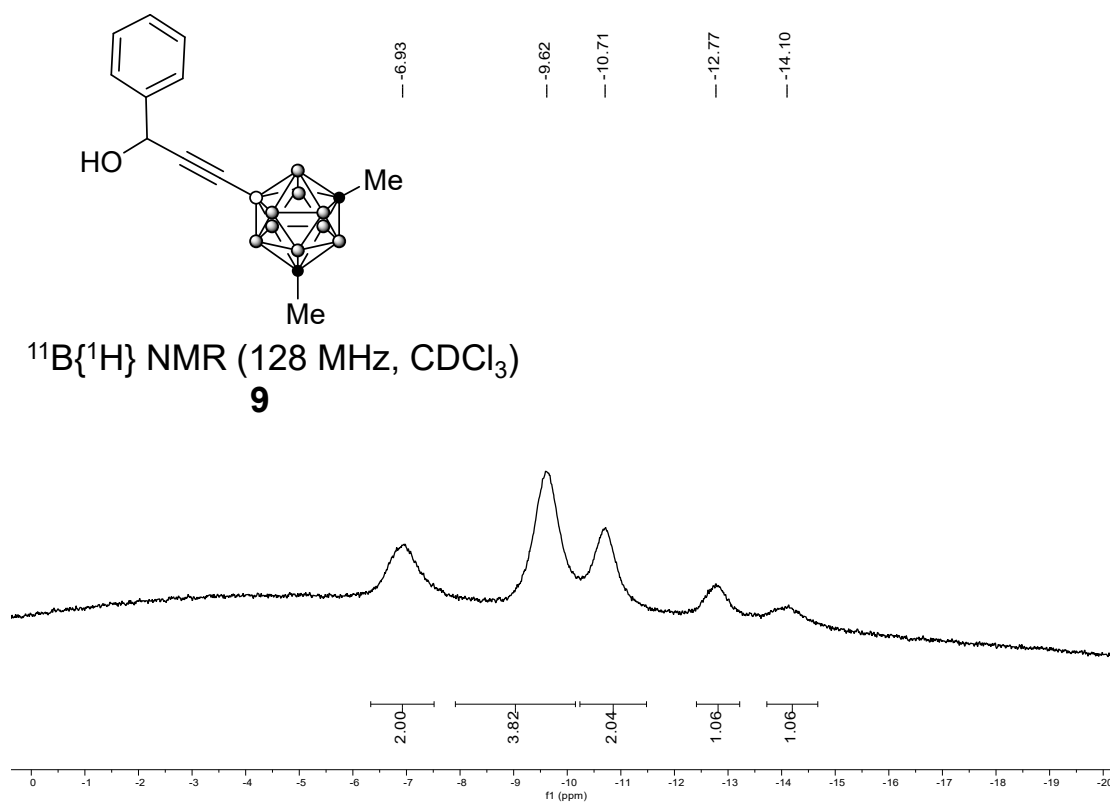

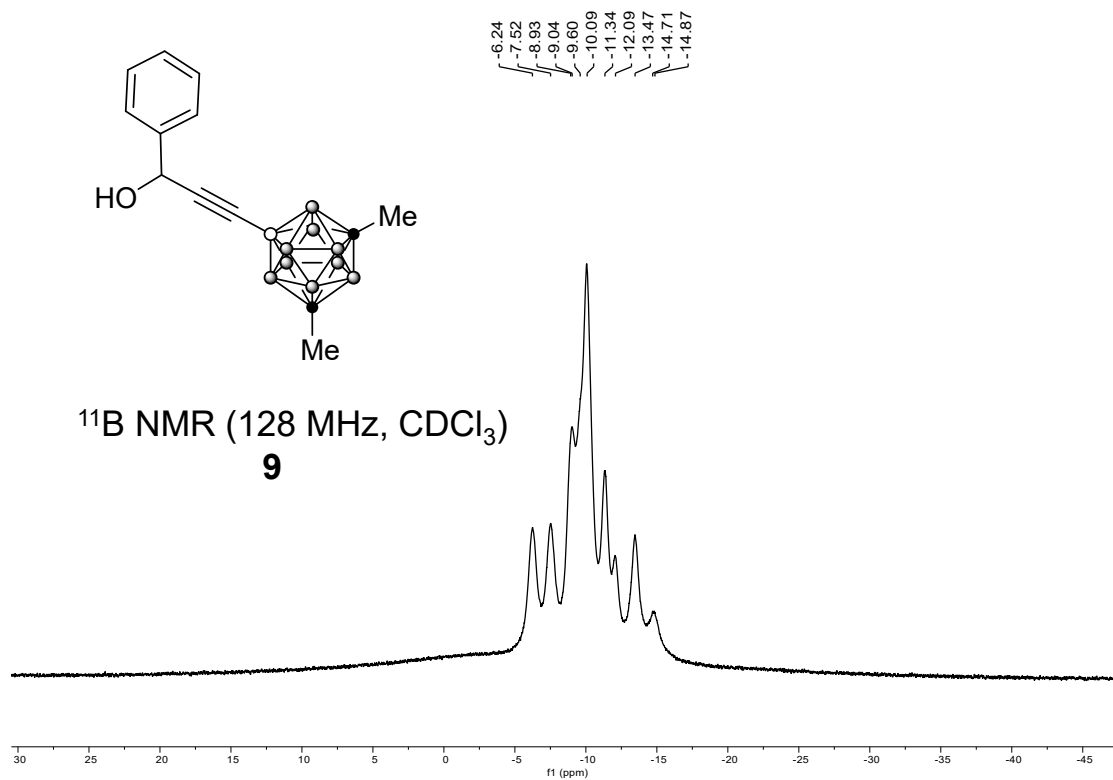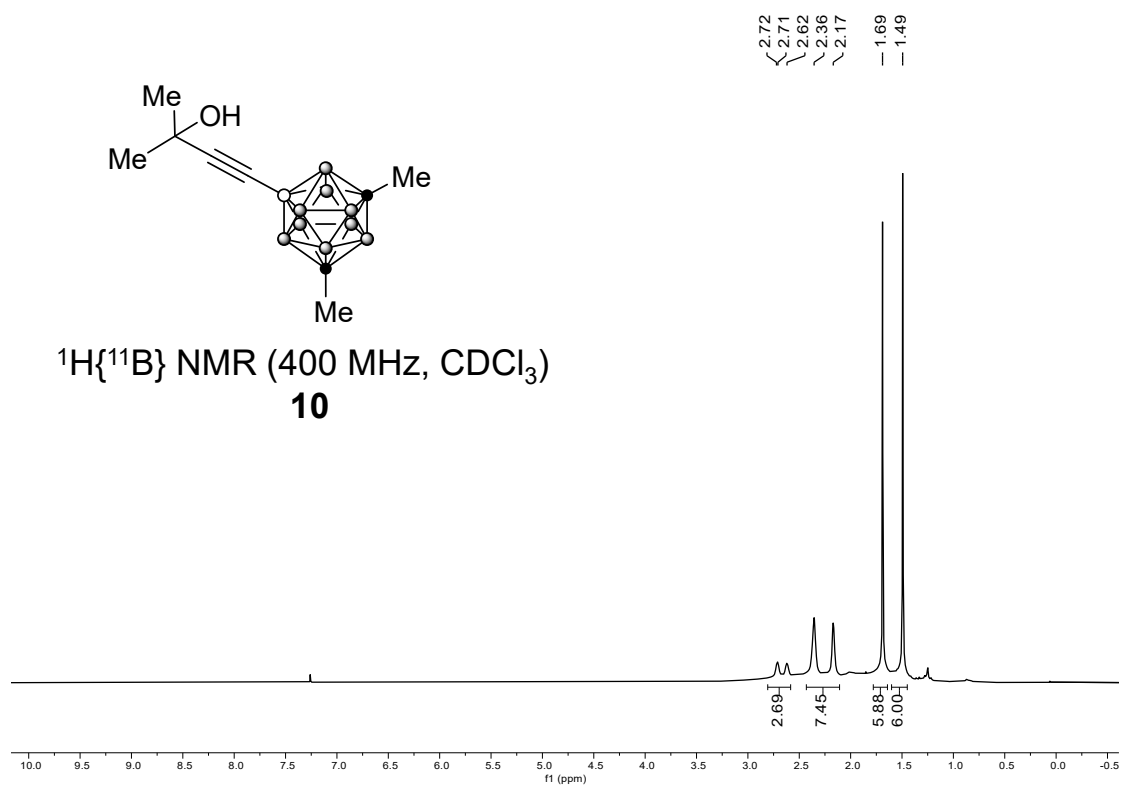

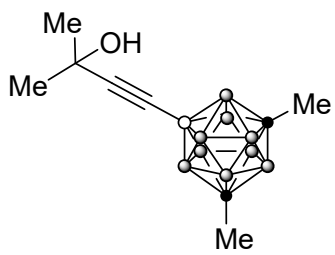

$^1\text{H}$  NMR (400 MHz,  $\text{CDCl}_3$ )  
**10**

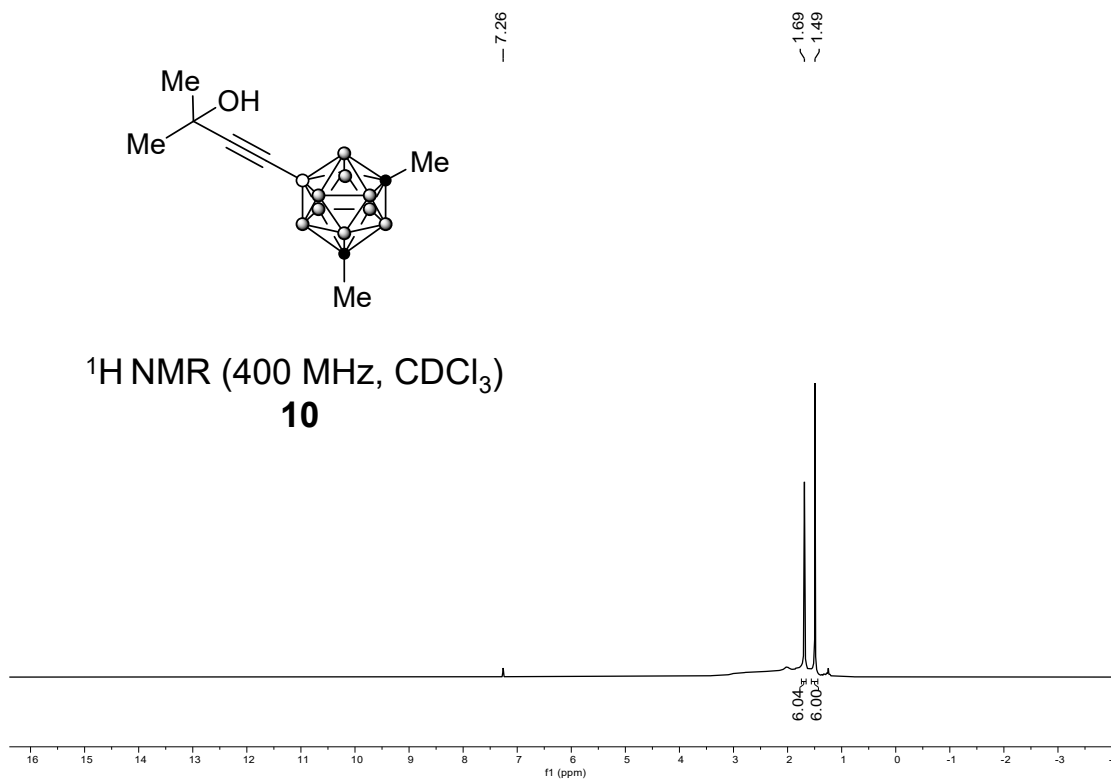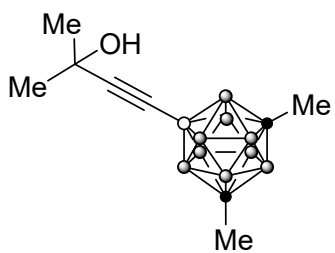

$^{13}\text{C}$  NMR (101 MHz,  $\text{CDCl}_3$ )  
**10**

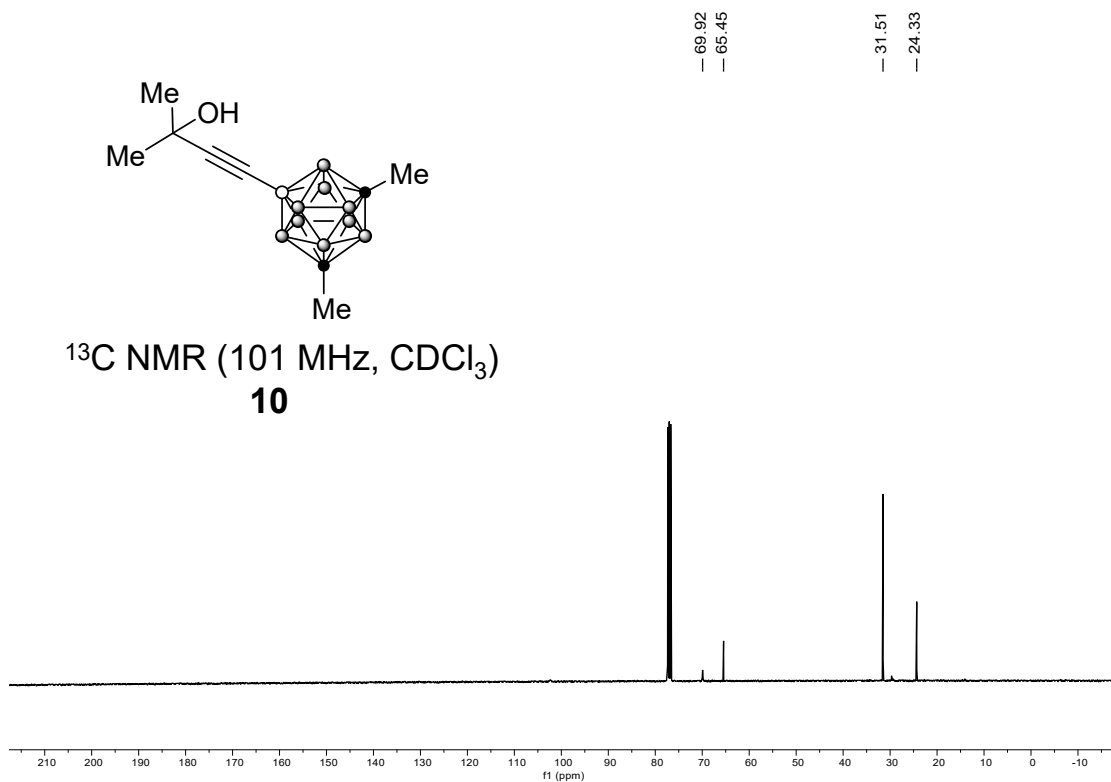

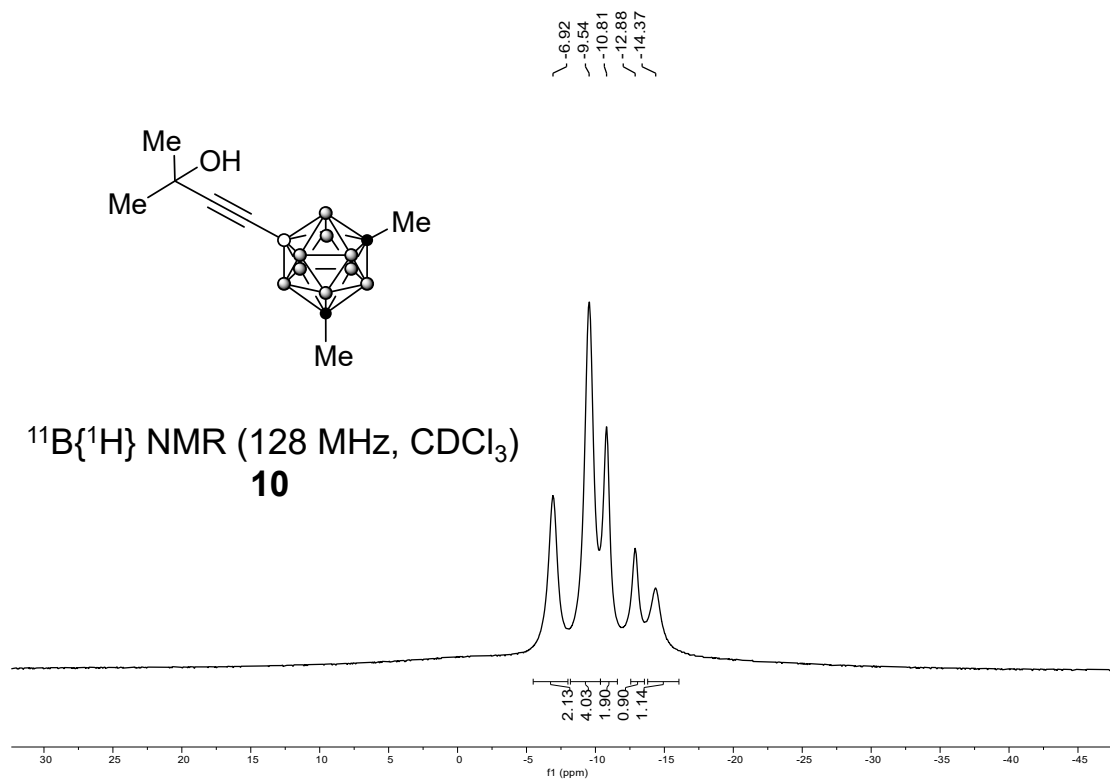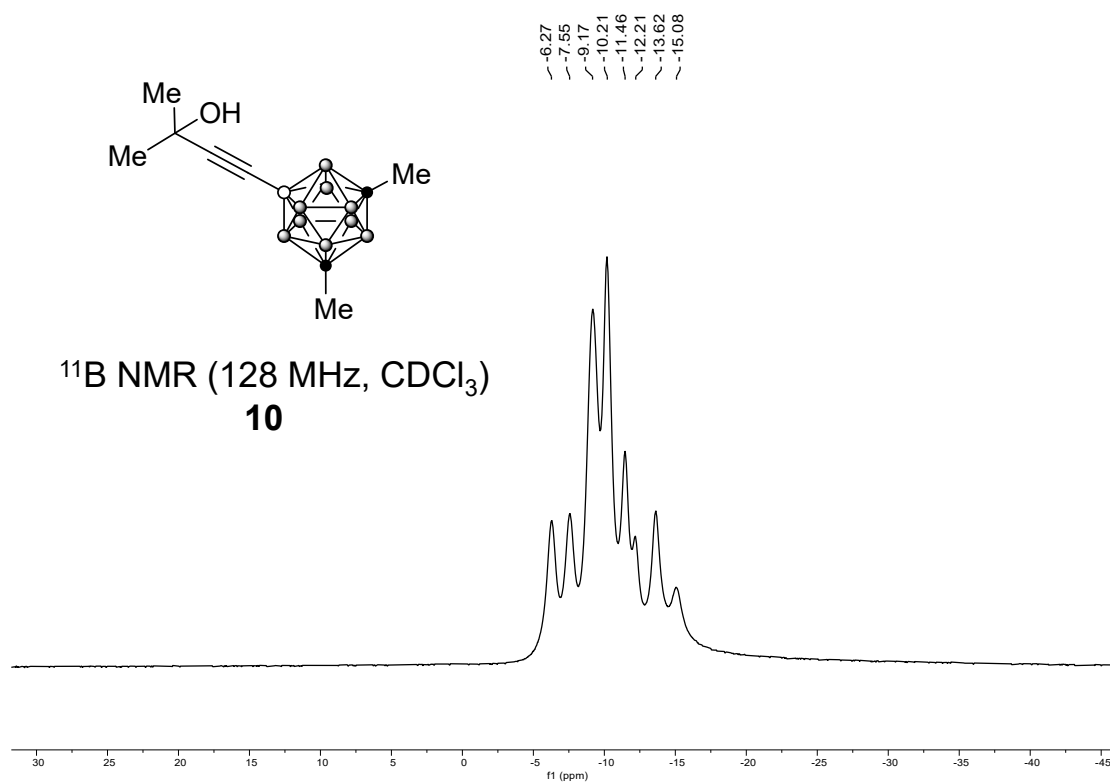

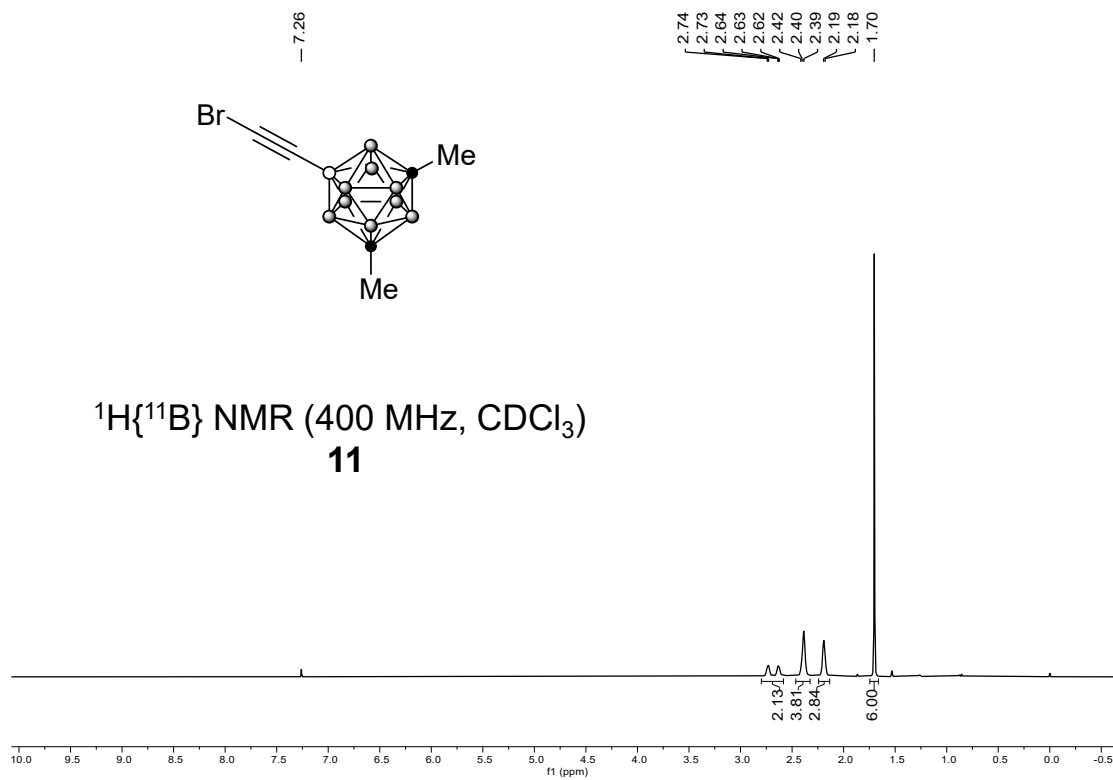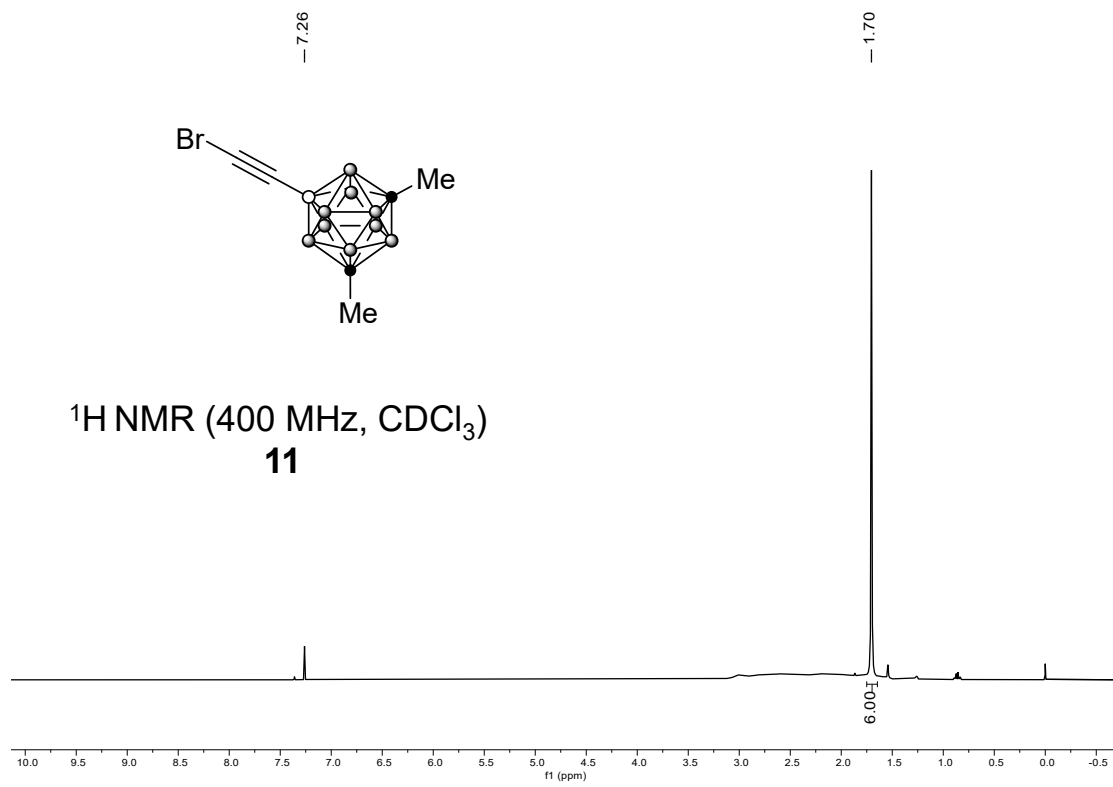

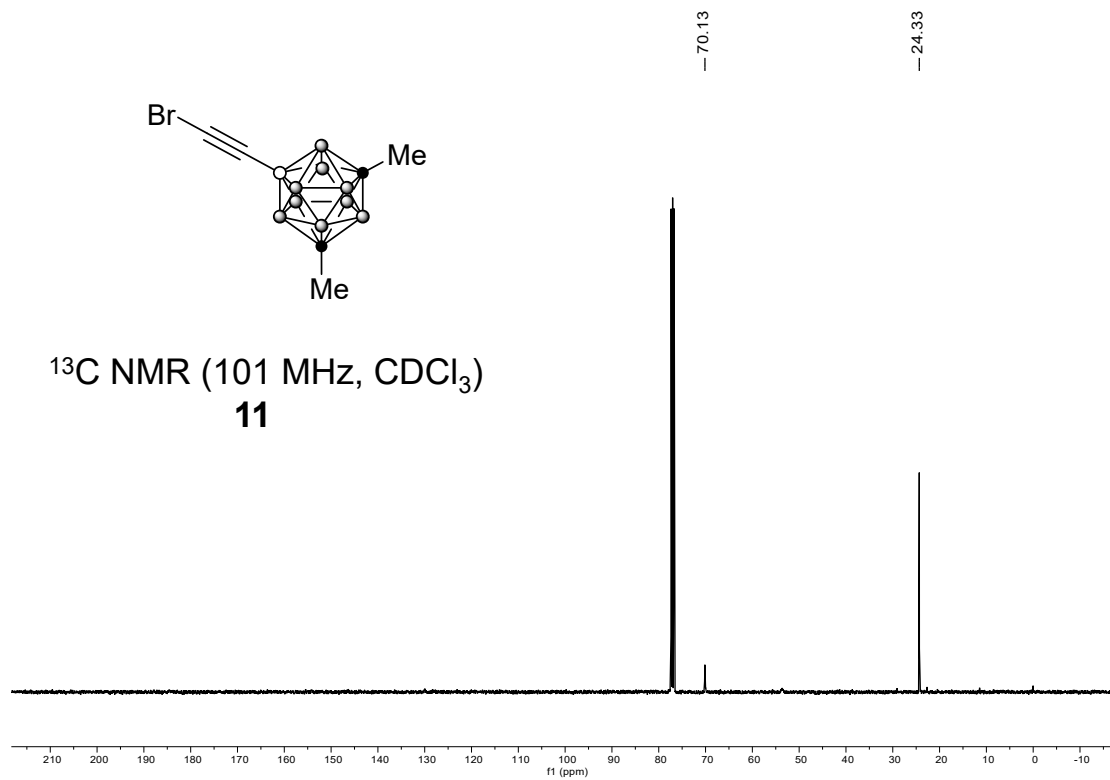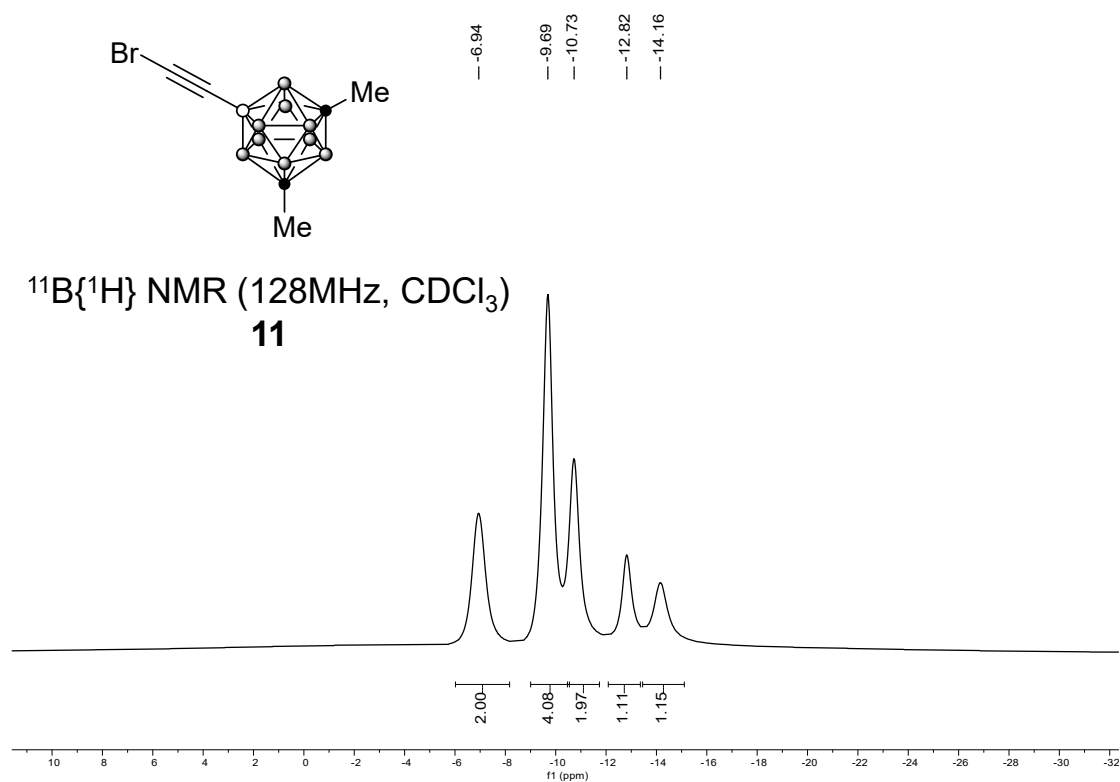

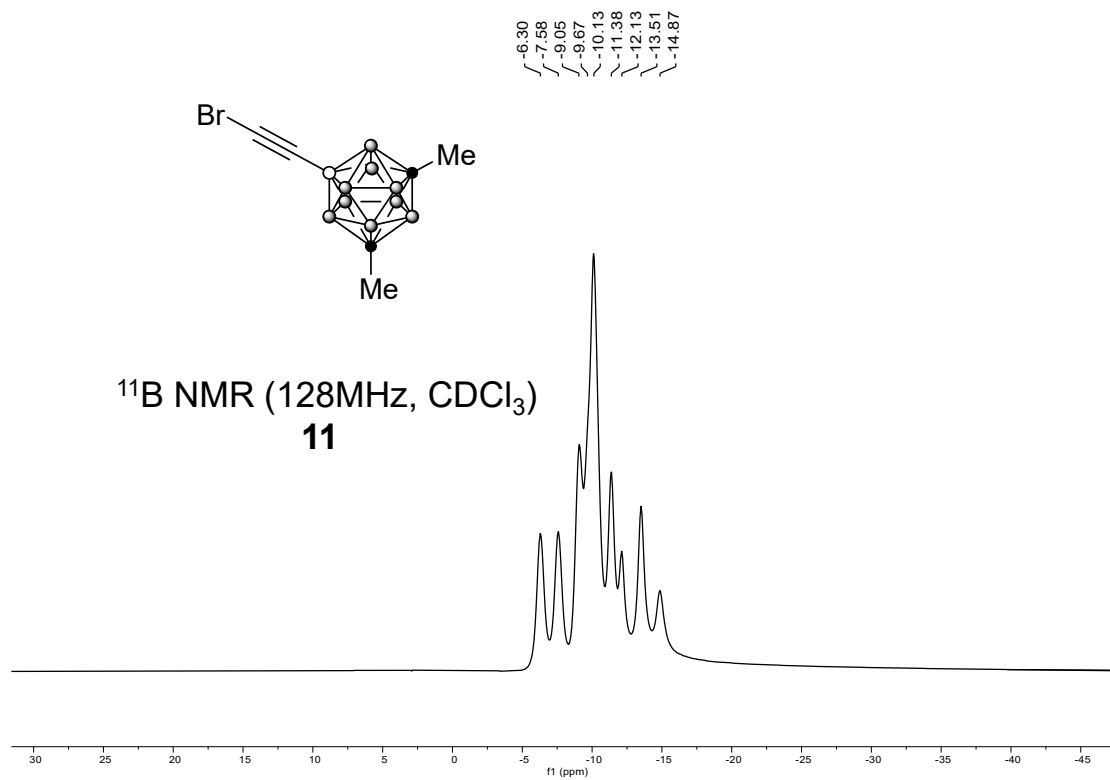

Supplement: d4qo01428f1.pdf [file d4qo01428f1.pdf]
